# Supplementary material for: Asymmetric C–H functionalization of cyclopropanes using an isoleucine-NH2 bidentate directing group
Source: PubMed Central journal article supplement (PMC5659170; doi:10.1039/c5sc01137j), 2015-04-16
Supplement: SC-006-C5SC01137J-s001.pdf [file SC-006-C5SC01137J-s001.pdf]

## *Supporting Information*

### **Asymmetric C–H Functionalization of Cyclopropanes Using Isoleucine-NH<sub>2</sub> Bidentate Directing Group**

Jinhee Kim, Mikyung Sim, Namhoon Kim, Sungwoo Hong\*

*Department of Chemistry, Korea Advance Institute of Science and Technology (KAIST) &  
Center for Catalytic Hydrocarbon Functionalizations, Institute for Basic Science (IBS),  
Daejeon 305-701, Korea*

|                                                      |     |
|------------------------------------------------------|-----|
| <b>General Methods and Materials</b>                 | S2  |
| <b>Experimental Procedure and data</b>               | S7  |
| <b><sup>1</sup>H- and <sup>13</sup>C-NMR Spectra</b> | S26 |
| <b>X-Ray-generated images for 2a</b>                 | S57 |

## General Methods and Materials

Commercial grade reagents and solvents were used without further purification except as indicated below. Analytical thin layer chromatography (TLC) was performed on precoated silica gel 60 F<sup>254</sup> plates and visualization on TLC was achieved by UV light (254 nm) and ninhydrin solution, and heat as developing agents. Flash column chromatography was undertaken on silica gel (400-630 mesh). <sup>1</sup>H NMR was recorded on 400 MHz and chemical shifts were quoted in parts per million (ppm) referenced to the appropriate solvent peak or 2.50 ppm for DMSO-d<sub>6</sub>. The following abbreviations were used to describe peak splitting patterns when appropriate: s = singlet, d = doublet, t = triplet, q = quartet, h = hexet, m = multiplet, dd = doublet of doublet, td = doublet of triplet, ddd = doublet of doublet of doublet. Coupling constants, *J*, were reported in hertz unit (Hz). <sup>13</sup>C NMR was recorded on 100 MHz and was fully decoupled by broad band proton decoupling. Chemical shifts were reported in ppm referenced to the center line of a triplet at 39.5 ppm of DMSO-d<sub>6</sub>. Diastereomeric ratios were determined by integration of HPLC. Analytical HPLC was performed with an Agilent 1200 Series HPLC utilizing Poroschell 120 EC-C18 columns (4.6 mm x 50 mm) with visualization at 254 nm. Melting points were determined using an electronthermal IA9000 series melting point apparatus. Mass spectral data were obtained from the KAIST Basic Science Institute by using ESI method.

## Experimental Procedure and data

### General procedure (GP I) for synthesis of starting materials

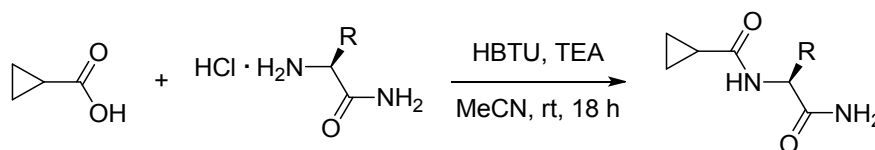

Triethylamine (2.15 equiv.) and HBTU (1.04 equiv.) were added to a solution of cyclopropane carboxylic acid (1.0 equiv.) and amino amide HCl (1.0 equiv.) in acetonitrile (3.5 M). After it was stirred at room temperature for 18 h, the resulting white solid was washed with acetonitrile to give pure amide. (Bach, A.; Eildal, J. N. N.; Stuhr-Hansen, N.; Deeskamp, R.; Gottschalk, M.; Pedersen, Søren, W.; Kristensen, A. S.; Strømgaard, K. *J. Med. Chem.* **2011**, *54*, 1333.)

## Optimization of Reaction Conditions

### Initial reaction condition

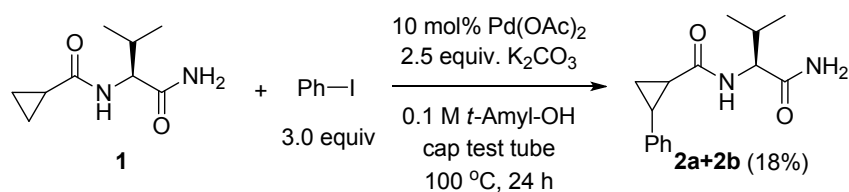

Solvent and Base screening was conducted, but the reaction did not proceed or only trace amount of product was observed under followed condition (Solvent : Toluene, *t*BuOH, DCE, Dioxane, H<sub>2</sub>O, *i*PrOH, DME, HFIP, DMF, DMSO, MeCN, MIBK, *n*BuOH, THF, 3-Pentanol, 1-pentanol/ Base : Na<sub>2</sub>CO<sub>3</sub>, Li<sub>2</sub>CO<sub>3</sub>, Cs<sub>2</sub>CO<sub>3</sub>, Ag<sub>2</sub>CO<sub>3</sub>, CuCO<sub>3</sub>, Cu(OH)<sub>2</sub>, CaCO<sub>3</sub>, (NH<sub>4</sub>)<sub>2</sub>CO<sub>3</sub>, KHCO<sub>3</sub>, NaHCO<sub>3</sub>, KOAc, KTFA, KOTf, KO<sup>t</sup>Bu, KF, KH<sub>2</sub>PO<sub>4</sub>, K<sub>3</sub>PO<sub>4</sub>, CsOAc, Ba(OAc)<sub>2</sub>, Co(OAc)<sub>2</sub>, Pyridine, TEA)

**Table S1. Concentration Control**

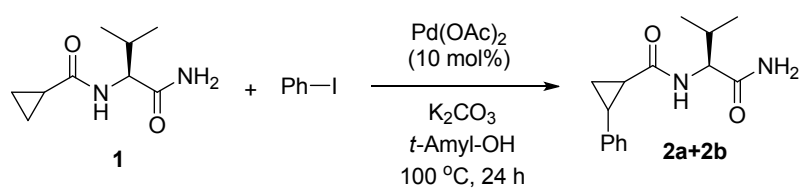

| entry    | Concentration (M) | Yield (mono + di) |
|----------|-------------------|-------------------|
| 1        | 0.1               | 23+ trace%        |
| 2        | 0.25              | 57 + 6 %          |
| 3        | 0.33              | 59 + 8 %          |
| <b>4</b> | <b>0.5</b>        | <b>62 + 10 %</b>  |
| 5        | 1.0               | 62 + 13%          |

<sup>a</sup> Conditions: 0.1 mmol of substrate, 10 mol % Pd(OAc)<sub>2</sub>, 2.0 equiv of Ph-I, 2.0 equiv of K<sub>2</sub>CO<sub>3</sub>, *t*-Amyl-OH, 100 °C, cap test tube, 24 h.

**Table S2. Equivalent Control**

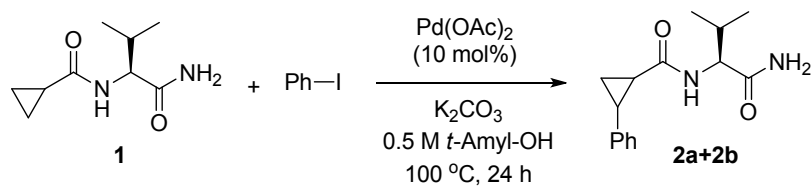

| entry    | PhI (equiv) | K <sub>2</sub> CO <sub>3</sub> (equiv) | Yield (mono + di) |
|----------|-------------|----------------------------------------|-------------------|
| 1        | 4           | 3.0                                    | 46 + 24 %         |
| 2        | 3           | 3.0                                    | 46 + 20 %         |
| 3        | 2           | 3.0                                    | 50 + 17 %         |
| 4        | 2           | 2.5                                    | 57 + 14 %         |
| 5        | 2           | 2.0                                    | 66 + 13 %         |
| 6        | 2           | 1.5                                    | 53 + 7 %          |
| 7        | 2           | 1.0                                    | 49 + 6 %          |
| <b>9</b> | <b>1.5</b>  | <b>2.0</b>                             | <b>71+16 %</b>    |

<sup>a</sup> Conditions: 0.1 mmol of substrate, 10 mol% Pd(OAc)<sub>2</sub>, Ph-I, K<sub>2</sub>CO<sub>3</sub>, 0.2 mL of *t*-Amyl-OH, 100 °C, cap test tube, 24 h.

**Table S3. Ligand Screening**

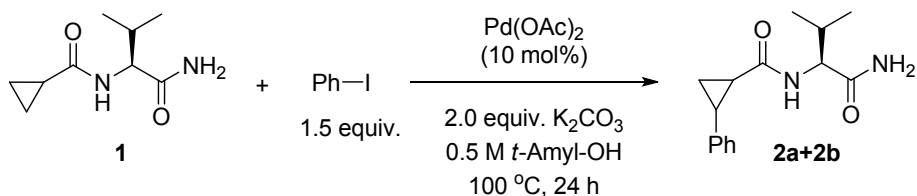

| entry | ligand                             | Conversion (mono + di) | entry | ligand                                     | Conversion (mono + di) |
|-------|------------------------------------|------------------------|-------|--------------------------------------------|------------------------|
| 1     | PPh <sub>3</sub> (0.2)             | 56+12 %                | 11    | PivOH (0.2)                                | 54 + 13 %              |
| 2     | PCy <sub>3</sub> (0.2)             | -                      | 12    | BzOH (0.2)                                 | 57 + 8 %               |
| 3     | X-Phos (0.2)                       | trace                  | 13    | TFA (0.2)                                  | 66 + 11 %              |
| 4     | DavePhos (0.2)                     | product ~ sm           | 14    | AdOH (0.2)                                 | -                      |
| 5     | JohnPhos (0.2)                     | trace                  | 15    | TsOH.H <sub>2</sub> O (0.2)                | product ~ sm           |
| 6     | pyridine (0.2)                     | product ~ sm           | 16    | CSA (0.2)                                  | -                      |
| 7     | diMepyr (0.2)                      | -                      | 17    | (BnO) <sub>2</sub> PO <sub>2</sub> H (0.2) | -                      |
| 8     | Me <sub>2</sub> Npyr (0.2)         | trace                  | 18    | DMSO (0.2)                                 | 64%                    |
| 9     | <i>t</i> Bu <sub>2</sub> pyr (0.2) | 67 + 13%               | 19    | PhSO <sub>2</sub> NH <sub>2</sub> (0.2)    | Trace                  |

|    |            |          |    |                          |           |
|----|------------|----------|----|--------------------------|-----------|
| 10 | AcOH (0.2) | 68 +13 % | 20 | iPr <sub>2</sub> S (0.2) | 61 + 21 % |
|----|------------|----------|----|--------------------------|-----------|

<sup>a</sup> Conditions: 0.1 mmol of substrate, 10 mol % Pd(OAc)<sub>2</sub>, 1.5 equiv of Ph-I, 2.0 equiv of K<sub>2</sub>CO<sub>3</sub>, 0.2 mL of *t*-Amyl-OH, 100 °C, cap test tube, 24 h. <sup>b</sup> Yield was determined by <sup>1</sup>H NMR analysis of the crude product using *p*-anisaldehyde as an internal standard.

**Table S4. Reaction Profile<sup>a</sup>**

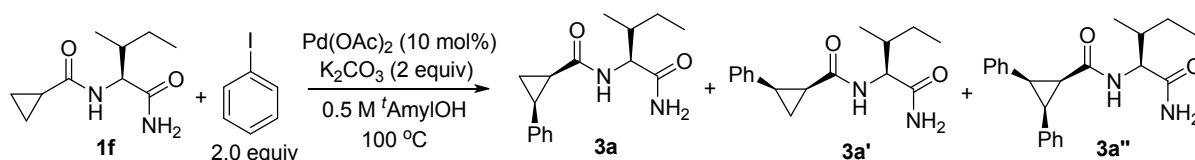

| entry | Time | NMR yield <sup>b</sup> |      |      | d.r. <sup>c</sup> |
|-------|------|------------------------|------|------|-------------------|
|       |      | 3a                     | 3a'  | 3a'' |                   |
| 1     | 1 h  | 33.7%                  | 4.7% | 2%   | 7.2:1             |
| 2     | 2 h  | 39.5%                  | 5.5% | 3%   | 7.2:1             |
| 3     | 4 h  | 49.3%                  | 6.7% | 7%   | 7.3:1             |
| 4     | 6 h  | 57.5%                  | 7.5% | 8%   | 7.7:1             |
| 5     | 9 h  | 57.4%                  | 7.5% | 11%  | 7.7:1             |
| 6     | 12 h | 66.3%                  | 6.7% | 16%  | 9.9:1             |
| 7     | 24 h | 66.1%                  | 6.2% | 16%  | 10.7:1            |

<sup>a</sup> (0.1 mmol), iodobenzene (2.0 equiv), Pd(OAc)<sub>2</sub> (10 mol%) and K<sub>2</sub>CO<sub>3</sub> (2.0 equiv.) in 0.2 mL of *t*-Amyl-OH (0.5 M), 100 °C, cap test tube. <sup>b</sup> 2-(4-bromophenyl)acetonitrile was used as reference material. <sup>c</sup> diastereomeric ratio was determined by HPLC analysis (C18 column, TFA:MeCN:H<sub>2</sub>O = 0.1:17:83)

### H/D exchange study

Although two diastereotopic hydrogens do not split each other, significant level of di-deuterated product (>40%) was observed when the reaction mixture was treated with D<sub>2</sub>O under the optimized conditions and in the absence of aryl iodide.

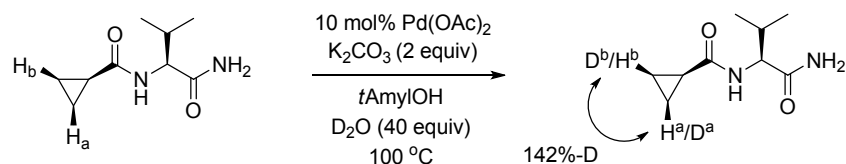

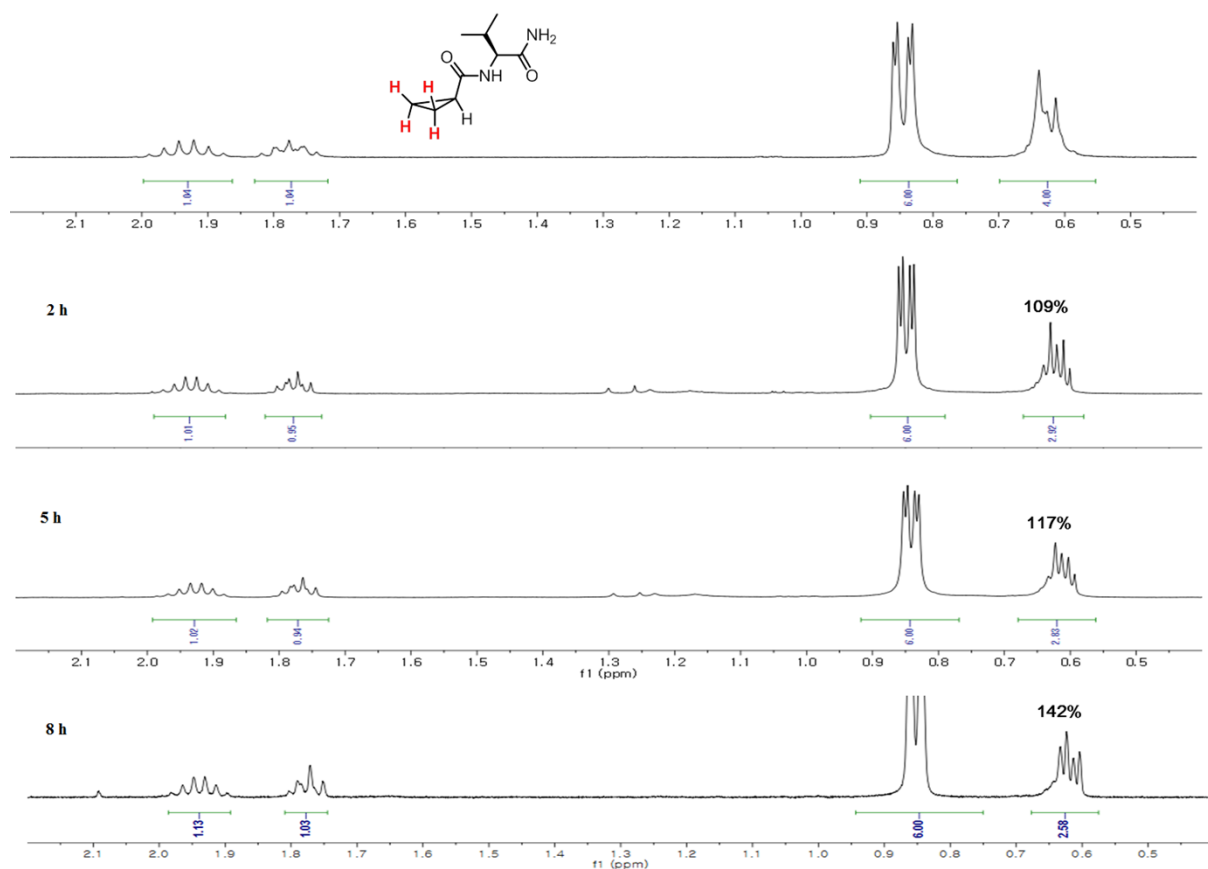

## LC data of representative compounds

### *cis-N-((2S, 3R)-1-amino-3-methyl-1-oxopentan-2-yl)-2-phenylcyclopropanecarboxamide*

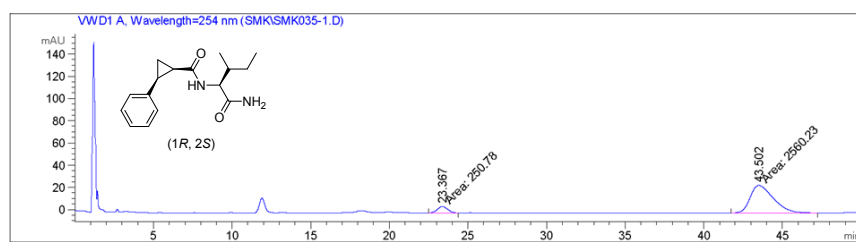

| Peak # | RetTime [min] | Type | Width [min] | Area [mAU*s] | Height [mAU] | Area %  |
|--------|---------------|------|-------------|--------------|--------------|---------|
| 1      | 23.367        | MM   | 0.7393      | 250.78035    | 5.65387      | 8.9214  |
| 2      | 43.502        | MM   | 1.7180      | 2560.22876   | 24.83679     | 91.0786 |

### *cis-N-((2S, 3R)-1-amino-3-methyl-1-oxopentan-2-yl)-2-(3,5-dimethylphenyl)cyclopropanecarboxamide*

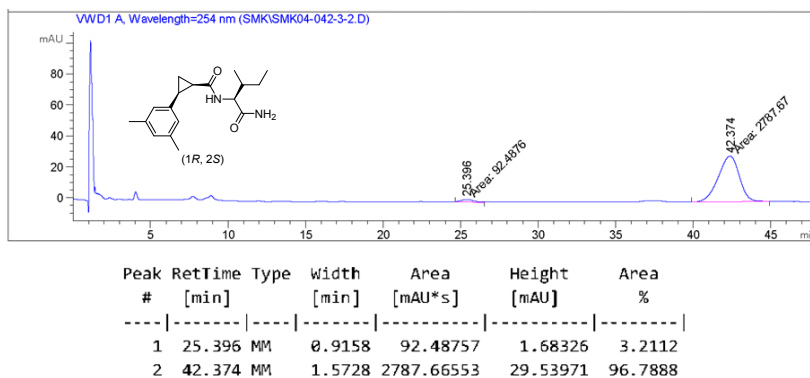

***cis*-*N*-((2*S*, 3*R*)-1-amino-3-methyl-1-oxopentan-2-yl)-2-(4-formylphenyl)cyclopropanecarboxamide**

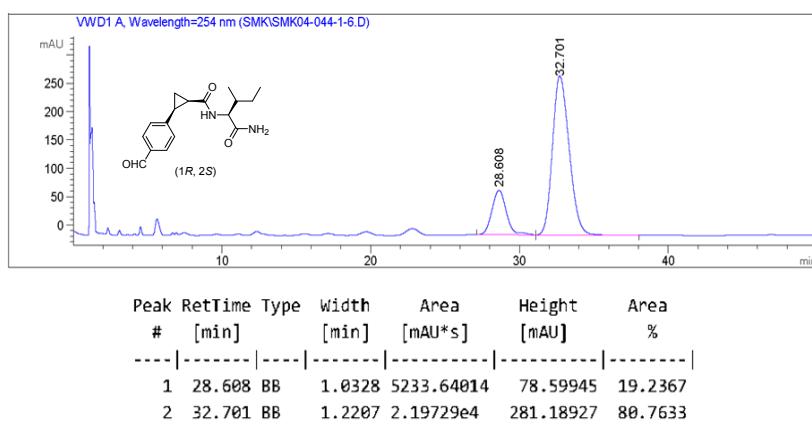

**General procedure (GP II) for diastereoselective arylation of cyclopropanes (2a-3z)**

The mixture of substrate **1** (0.2 mmol), aryl iodide (1.5-3.0 equiv.), Pd(OAc)<sub>2</sub> (0.1 equiv.), K<sub>2</sub>CO<sub>3</sub> (2.0-2.5 equiv.) in *tert*-Amyl alcohol (0.4 mL) was stirred for 24 h at 100 °C. The mixture was monitored by TLC using DCM and MeOH (20:1, 3 times) as the mobile phase. The reaction mixture was cooled to room temperature, filtrated on celite using EtOAc as eluent. After the filtrate was evaporated on reduced pressure, the crude residue was roughly purified by flash chromatography on silica gel (DCM to DCM:MeOH=10:1). The residue was dissolve in DMSO and diastereomeric ratio was determined by HPLC analysis (EC-C18 column, λ = 254 nm). The major diastereomer was separated by flash chromatography on silica gel (DCM:MeOH = 30:1).

***cis*-*N*-((*S*)-3-methyl-1-(methylamino)-1-oxobutan-2-yl)-2-phenylcyclopropanecarboxamide (**2**)**

Substrate (0.1 mmol), aryl iodide (3.0 equiv), Pd(OAc)<sub>2</sub> (0.1 equiv.), K<sub>2</sub>CO<sub>3</sub> (2.5 equiv) in *tert*-Amylalcohol (0.2 mL), 100 °C, 24 h. Yield 26% (d.r. = 8.1:1). The diastereomeric ratio was determined by HPLC analysis on C18 column (TFA:MeCN:H<sub>2</sub>O = 0.1:16:84, flow rate 0.5 mL/min, λ = 254 nm, τ<sub>minor</sub> = 17.0 min, τ<sub>major</sub> = 26.5 min.). A trace amount of the corresponding minor diastereomer was not isolated.

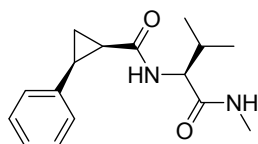

(1R, 2S)

Yield 23% (6.3 mg). mp 198-200 °C, White solid. <sup>1</sup>H NMR (400 MHz, DMSO-*d*<sub>6</sub>) δ 7.93 (d, *J* = 8.8 Hz, 1H), 7.75 (q, *J* = 4.6 Hz, 1H), 7.20 – 7.11 (m, 4H), 7.14 – 7.05 (m, 1H), 3.80 (dd, *J* = 8.8, 6.8 Hz, 1H), 2.53 (d, *J* = 4.6 Hz, 3H), 2.42 – 2.31 (m, 1H), 2.19 (ddd, *J* = 9.4, 7.8, 5.8 Hz, 1H), 1.76 (h, *J* = 6.8 Hz, 1H), 1.47 (ddd, *J* = 7.2, 5.8, 4.4 Hz, 1H), 1.20 – 1.09 (m, 1H), 0.62 (d, *J* = 6.8 Hz, 3H) 0.58 (d, *J* = 6.8 Hz, 3H). <sup>13</sup>C NMR (101 MHz, DMSO-*d*<sub>6</sub>) δ 171.6, 168.3, 137.6, 128.9, 127.3, 125.7, 57.9, 29.9, 25.3, 24.0, 23.1, 18.9, 18.0, 9.3. HRMS (ESI<sup>+</sup>) *m/z* calcd. C<sub>16</sub>H<sub>22</sub>N<sub>2</sub>NaO<sub>2</sub><sup>+</sup> [M+Na]<sup>+</sup>: 297.1573, found: 297.1577.

***cis* N-((*S*)-1-amino-3-methyl-1-oxobutan-2-yl)-2-phenylcyclopropane-carboxamide (2)**

Substrate (0.3 mmol), aryl iodide (2.0 equiv), Pd(OAc)<sub>2</sub> (0.1 equiv), K<sub>2</sub>CO<sub>3</sub> (2.0 equiv) in *tert*-Amylalcohol (0.6 mL), 100 °C, 24 h. Yield 71% (d.r. = 8.6:1). The diastereomeric ratio was determined by HPLC analysis on C18 column (TFA:MeCN:H<sub>2</sub>O = 0.1:20:80, flow rate 0.5 mL/min, λ = 254 nm, τ<sub>major</sub> = 4.1 min, τ<sub>minor</sub> = 5.8 min.) NOE was observed between H<sup>1</sup> and H<sup>2</sup> in both of diastereomers. This result indicates that obtained 2 diastereomers has *cis* configuration. The absolute configuration of major product was confirmed by crystallographic data.

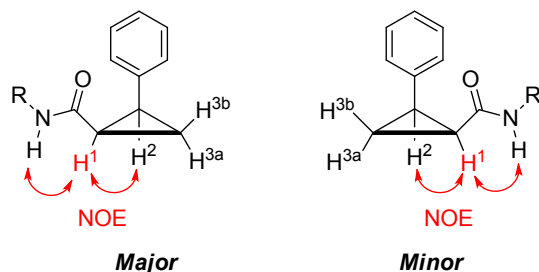



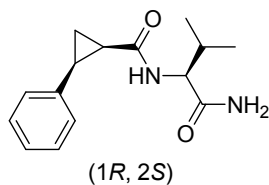

Yield 63% (49 mg). mp 184-185 °C. White solid. <sup>1</sup>H NMR (400 MHz, DMSO-*d*<sub>6</sub>) δ 7.83 (d, *J* = 8.9 Hz, 1H), 7.25 (s, 1H), 7.19 – 7.13 (m, 4H), 7.13 – 7.06 (m, 1H), 6.92 (s, 1H), 3.87 (dd, *J* = 8.9, 6.4 Hz, 1H), 2.42 – 2.31 (m, 1H), 2.20 (ddd, *J* = 9.4, 7.8, 5.7 Hz, 1H), 1.78 (h, *J* = 6.8 Hz, 1H), 1.48 (ddd, *J* = 7.3, 5.7, 4.3 Hz, 1H), 1.15 (ddd, *J* = 8.6, 7.8, 4.3 Hz, 1H), 0.63 (d, *J* = 6.8 Hz, 3H), 0.57 (d, *J* = 6.8 Hz, 3H). <sup>13</sup>C NMR (101 MHz, DMSO-*d*<sub>6</sub>) δ 173.6, 168.7, 138.1, 129.4, 127.8, 126.2, 57.9, 30.4, 24.4, 23.6, 19.4, 18.2, 9.7. HRMS (ESI<sup>+</sup>) *m/z* calcd. C<sub>15</sub>H<sub>20</sub>N<sub>2</sub>NaO<sub>2</sub><sup>+</sup> [M+Na]<sup>+</sup>: 283.1417, found: 283.1400.

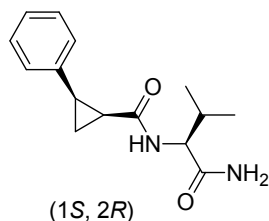

Minor product. mp 195-197 °C. White solid. <sup>1</sup>H NMR (400 MHz, DMSO-*d*<sub>6</sub>) δ 7.89 (d, *J* = 9.2 Hz, 1H), 7.23 – 7.02 (m, 6H), 6.90 (s, 1H), 3.98 (dd, *J* = 9.2, 6.7 Hz, 1H), 2.37 (q, *J* = 8.5 Hz, 1H), 2.27 – 2.16 (m, 1H), 1.88 (h, *J* = 6.7 Hz, 1H), 1.43 (ddd, *J* = 7.2, 5.7, 4.2 Hz, 1H), 1.16 (td, *J* = 8.2, 4.2 Hz, 1H), 0.78 (d, *J* = 6.7 Hz, 3H), 0.78 (d, *J* = 6.7 Hz, 3H). <sup>13</sup>C NMR (101 MHz, DMSO-*d*<sub>6</sub>) δ 173.0, 168.7, 137.8, 129.2, 127.5, 125.8, 57.2, 30.5, 24.0, 22.4, 19.3, 17.9, 9.9. HRMS (ESI<sup>+</sup>) *m/z* calcd. C<sub>15</sub>H<sub>20</sub>N<sub>2</sub>NaO<sub>2</sub><sup>+</sup> [M+Na]<sup>+</sup>: 283.1417, found: 283.1397.

**(1*s*, 2*R*, 3*S*)-*N*-((*S*)-1-amino-3-methyl-1-oxobutan-2-yl)-2,3-diphenylcyclopropanecarboxamide (2)**

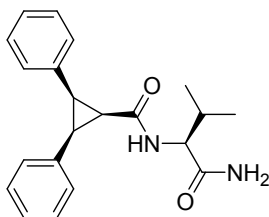

Diarylated product. mp 90-92 °C. White solid. <sup>1</sup>H NMR (400 MHz, DMSO-*d*<sub>6</sub>) δ 7.92 (d, *J* = 8.9 Hz, 1H), 7.26 (s, 1H), 7.22 – 7.00 (m, 10H), 7.00 – 6.88 (m, 1H), 3.99 (dd, *J* = 8.9, 6.5 Hz, 1H), 2.91 – 2.76 (m, 2H), 2.59 (t, *J*

= 9.3 Hz, 1H), 1.93 – 1.84 (m, 1H), 0.74 (d,  $J = 6.7$  Hz, 6H).  $^{13}\text{C}$  NMR (101 MHz,  $\text{DMSO-}d_6$ )  $\delta$  173.1, 168.1, 135.7, 135.3, 131.2, 130.7, 126.8, 126.8, 125.5, 125.5, 57.4, 30.1, 28.2, 28.1, 26.4, 19.2, 17.9. HRMS (ESI<sup>+</sup>)  $m/z$  calcd.  $\text{C}_{21}\text{H}_{24}\text{N}_2\text{NaO}_2^+$   $[\text{M}+\text{Na}]^+$ : 359.1730, found: 359.1733.

***cis-N-((2S, 3R)-1-amino-3-methyl-1-oxopentan-2-yl)-2-phenylcyclopropanecarboxamide (3a)***

Substrate (0.3 mmol), aryl iodide (2.0 equiv),  $\text{Pd}(\text{OAc})_2$  (0.1 equiv),  $\text{K}_2\text{CO}_3$  (2.0 equiv) in *tert*-Amyl alcohol (0.6 mL), 100 °C, 24 h. Yield 70% (d.r. = 10.2:1). The diastereomeric ratio was determined by HPLC analysis on C18 column (TFA:MeCN:H<sub>2</sub>O = 0.1:17:83, flow rate 0.5 mL/min,  $\lambda = 254$  nm,  $\tau_{\text{minor}} = 23.4$  min,  $\tau_{\text{major}} = 43.5$  min.)

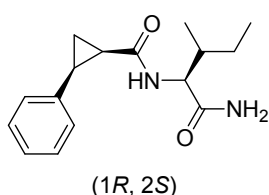

Yield 64% (52.8 mg). mp 193-195 °C. White solid.  $^1\text{H}$  NMR (400 MHz,  $\text{DMSO-}d_6$ )  $\delta$  7.85 (d,  $J = 9.0$  Hz, 1H), 7.25 (s, 1H), 7.19 – 7.04 (m, 5H), 6.90 (s, 1H), 3.86 (dd,  $J = 9.0, 7.4$  Hz, 1H), 2.40 – 2.29 (m, 1H), 2.17 (ddd,  $J = 9.4, 7.8, 5.7$  Hz, 1H), 1.57 – 1.42 (m, 2H), 1.23 – 1.08 (m, 2H), 0.90 – 0.77 (m, 1H), 0.62 (t,  $J = 7.4$  Hz, 3H), 0.59 (d,  $J = 6.8$  Hz, 3H).  $^{13}\text{C}$  NMR (101 MHz,  $\text{DMSO-}d_6$ )  $\delta$  173.3, 168.1, 137.6, 128.9, 127.3, 125.7, 56.5, 36.1, 24.0, 24.0, 23.2, 15.2, 10.8, 9.2. HRMS (ESI<sup>+</sup>)  $m/z$  calcd.  $\text{C}_{16}\text{H}_{22}\text{N}_2\text{NaO}_2^+$   $[\text{M}+\text{Na}]^+$ : 297.1573, found: 297.1574.

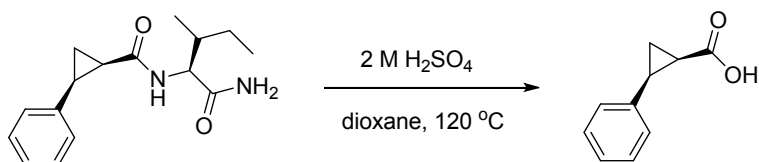

The Suspension of the amide (0.1 mmol) in 4 M  $\text{H}_2\text{SO}_4(\text{aq})$  and 1,4-dioxane (1:1) was heated to 120 °C for 20 h. The resulting solution was cooled to room temperature, diluted with  $\text{H}_2\text{O}$  and extracted 3 times with ether. The combined organic layer was dried over  $\text{Mg}_2\text{SO}_4$  and concentrated. The residue was purified by flash chromatography on silica gel (DCM:MeOH = 15:1) to give (1R,2S)-2-phenylcyclopropanecarboxylic acid (13 mg, 81%). Observed  $[\alpha]_D^{20} = -28.9^\circ$  ( $c = 0.4$ ,  $\text{CHCl}_3$ , 20 °C), lit. for >98% ee  $[\alpha]_D^{20} = -28^\circ$  ( $c = 1.02$ ,  $\text{CHCl}_3$ ) (Elling, G. R.; Hahn, R. C.; Schwab, G. *J. Am. Chem. Soc.* **1973**, *95*, 5659.)

***cis-N-((S)-1-amino-3,3-dimethyl-1-oxobutan-2-yl)-2-phenylcyclopropanecarboxamide (3b)***

Substrate (0.3 mmol), aryl iodide (2.0 equiv), Pd(OAc)<sub>2</sub> (0.1 equiv), K<sub>2</sub>CO<sub>3</sub> (2.0 equiv) in *tert*-Amylalcohol (0.6 mL), 100 °C, 24 h. Yield 49%. (d.r. = 13.7:1). The diastereomeric ratio was determined by HPLC analysis on C18 column (TFA:MeCN:H<sub>2</sub>O = 0.1:20:80, flow rate 0.5 mL/min, λ = 254 nm, τ<sub>minor</sub> = 12.3 min, τ<sub>major</sub> = 23.0 min.)

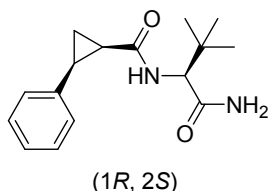

Yield 46% (38.2 mg). mp 178-180°C. White solid. <sup>1</sup>H NMR (400 MHz, DMSO-*d*<sub>6</sub>) δ 7.75 (d, *J* = 9.5 Hz, 1H), 7.33 (s, 1H), 7.22 – 7.10 (m, 4H), 7.13 – 7.03 (m, 1H), 6.93 (s, 1H), 3.92 (d, *J* = 9.5 Hz, 1H), 2.42 – 2.31 (m, 1H), 2.27 (ddd, *J* = 9.4, 7.8, 5.8 Hz, 1H), 1.49 (ddd, *J* = 7.2, 5.8, 4.3 Hz, 1H), 1.14 (td, *J* = 8.1, 4.3 Hz, 1H), 0.68 (s, 9H). <sup>13</sup>C NMR (101 MHz, DMSO-*d*<sub>6</sub>) δ 172.4, 168.1, 137.6, 129.0, 127.3, 125.7, 59.6, 33.3, 26.5, 24.1, 23.2, 9.2. HRMS (ESI<sup>+</sup>) *m/z* calcd. C<sub>16</sub>H<sub>22</sub>N<sub>2</sub>NaO<sub>2</sub><sup>+</sup> [M+Na]<sup>+</sup>: 297.1573, found: 297.1581.

***cis*-N-((2*S*, 3*S*)-1-amino-3-(benzyloxy)-1-oxobutan-2-yl)-2-phenylcyclopropanecarboxamide (3c)**

Substrate (0.1 mmol), aryl iodide (5.0 equiv), Pd(OAc)<sub>2</sub> (0.1 equiv), K<sub>2</sub>CO<sub>3</sub> (3.0 equiv) in *tert*-Amylalcohol (0.6 mL), 100 °C, 6 h. Yield 46%. (d.r. = 6.2:1) The diastereomeric ratio was determined by HPLC analysis on C18 column (TFA:MeCN:H<sub>2</sub>O = 0.1:20:80, flow rate 0.5 mL/min, λ = 254 nm, τ<sub>minor</sub> = 53.8 min, τ<sub>major</sub> = 58.9 min.)

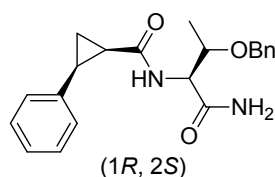

Yield 40% (13.8 mg). colorless gum. <sup>1</sup>H NMR (400 MHz, DMSO-*d*<sub>6</sub>) δ 7.84 (d, *J* = 9.1 Hz, 1H), 7.37 – 7.23 (m, 5H), 7.22 – 7.04 (m, 7H), 4.43 (d, *J* = 12.0 Hz, 1H), 4.37 (d, *J* = 12.0 Hz, 1H), 4.11 (dd, *J* = 9.1, 3.4 Hz, 1H), 3.74 (qd, *J* = 6.2, 3.1 Hz, 1H), 2.45 – 2.27 (m, 2H), 1.50 (ddd, *J* = 7.1, 5.7, 4.2 Hz, 1H), 1.17 (td, *J* = 8.2, 4.2 Hz, 1H), 0.71 (d, *J* = 6.2 Hz, 3H). <sup>13</sup>C NMR (101 MHz, DMSO-*d*<sub>6</sub>) δ 172.1, 168.6, 138.7, 137.5, 128.9, 128.1, 127.4, 127.3, 127.2, 125.8, 74.5, 70.1, 56.5, 24.1, 23.3, 15.8, 9.4. HRMS (ESI<sup>+</sup>) *m/z* calcd. C<sub>21</sub>H<sub>24</sub>N<sub>2</sub>NaO<sub>3</sub><sup>+</sup> [M+Na]<sup>+</sup>:

375.1679, found: 375.1681.

***cis-N-((S)-2-amino-2-oxo-1-phenylethyl)-2-phenylcyclopropanecarboxamide (3d)***

Substrate (0.1 mmol), aryl iodide (2.0 equiv), Pd(OAc)<sub>2</sub> (0.1 equiv), K<sub>2</sub>CO<sub>3</sub> (2.0 equiv) in *tert*-Amylalcohol (0.2 mL), 100 °C, 24 h. Yield 56% (d.r. = 3.2:1). The diastereomeric ratio was determined by HPLC analysis on C18 column (TFA:MeCN:H<sub>2</sub>O = 0.1:15:85, flow rate 0.5 mL/min, λ = 254 nm, τ<sub>minor</sub> = 43.9 min, τ<sub>major</sub> = 68.1 min.)

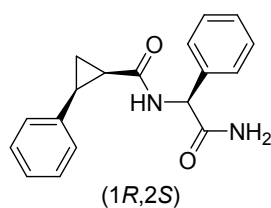

0.1 mmol scale. Yield 42% (12.3 mg). mp 178-180 °C. White solid. <sup>1</sup>H NMR (400 MHz, DMSO-*d*<sub>6</sub>) δ 8.46 (d, *J* = 8.0 Hz, 1H), 7.61 (s, 1H), 7.27 – 7.20 (m, 3H), 7.17 – 7.15 (m, 2H), 7.13 – 7.03 (m, 6H), 5.19 (d, *J* = 8.0 Hz, 1H), 2.41 – 2.32 (m, 1H), 2.30 – 2.25 (m, 1H), 1.48 – 1.44 (m, 1H), 1.20 – 1.15 (m, 1H). <sup>13</sup>C NMR (101 MHz, DMSO-*d*<sub>6</sub>) δ 171.8, 168.3, 138.8, 137.5, 129.0, 128.0, 127.4, 127.1, 126.8, 125.8, 56.1, 24.1, 22.7, 9.5. HRMS (ESI<sup>+</sup>) *m/z* calcd. C<sub>18</sub>H<sub>18</sub>N<sub>2</sub>NaO<sub>2</sub><sup>+</sup> [M+Na]<sup>+</sup>: 317.1260, found: 317.1232.

***cis-N-((S)-2-amino-1-cyclohexyl-2-oxoethyl)-2-phenylcyclopropanecarboxamide (3e)***

Substrate (0.3 mmol), aryl iodide (2.0 equiv), Pd(OAc)<sub>2</sub> (0.1 equiv), K<sub>2</sub>CO<sub>3</sub> (2.0 equiv) in *tert*-Amylalcohol (0.6 mL), 100 °C, 24 h. Yield 55% (d.r. = 8.8:1). The diastereomeric ratio was determined by HPLC analysis on C18 column (TFA:MeCN:H<sub>2</sub>O = 0.1:20:80, flow rate 0.5 mL/min, λ = 254 nm, τ<sub>minor</sub> = 14.3 min, τ<sub>major</sub> = 21.9 min.)

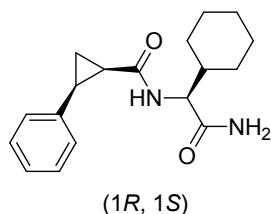

Yield 49% (44.3 mg). mp 244-245°C. White solid. <sup>1</sup>H NMR (400 MHz, DMSO-*d*<sub>6</sub>) δ 7.81 (d, *J* = 8.9 Hz, 1H),

7.27 (s, 1H), 7.22 – 7.11 (m, 4H), 7.14 – 7.06 (m, 1H), 6.94 (s, 1H), 3.89 (dd,  $J = 8.9, 6.7$  Hz, 1H), 2.41 – 2.30 (m, 1H), 2.19 (ddd,  $J = 9.4, 7.7, 5.7$  Hz, 1H), 1.58 – 1.44 (m, 4H), 1.45 – 1.21 (m, 3H), 1.13 (td,  $J = 8.1, 4.4$  Hz, 1H), 1.09 – 0.88 (m, 3H), 0.74 – 0.55 (m, 2H).  $^{13}\text{C}$  NMR (101 MHz, DMSO- $d_6$ )  $\delta$  173.0, 168.0, 137.6, 128.9, 127.3, 125.7, 56.8, 28.9, 27.6, 25.7, 25.5, 23.9, 23.4, 9.0. HRMS (ESI $^+$ )  $m/z$  calcd.  $\text{C}_{18}\text{H}_{24}\text{N}_2\text{NaO}_2^+$  [M+Na] $^+$ : 323.1730, found: 323.1737.

***cis-N-((S)-1-amino-1-oxo-3-phenylpropan-2-yl)-2-phenylcyclopropanecarboxamide (3f)***

Substrate (0.3 mmol), aryl iodide (2.0 equiv), Pd(OAc) $_2$  (0.1 equiv), K $_2$ CO $_3$  (2.0 equiv) in *tert*-Amyl alcohol (0.6 mL), 100 °C, 24 h. Yield 54%. (d.r. = 3.4:1) The diastereomeric ratio was determined by HPLC analysis on C18 column (TFA:MeCN:H $_2$ O = 0.1:25:75, flow rate 0.5 mL/min,  $\lambda = 254$  nm,  $\tau_{\text{minor}} = 26.0$  min,  $\tau_{\text{major}} = 42.4$  min.)

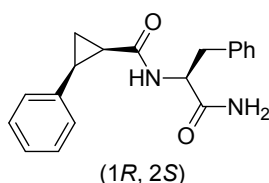

Yield 41% (36.7 mg). mp 216-218 °C. White solid.  $^1\text{H}$  NMR (400 MHz, DMSO- $d_6$ )  $\delta$  8.16 (d,  $J = 8.1$  Hz, 1H), 7.34 (s, 1H), 7.29 – 7.18 (m, 3H), 7.15 – 7.08 (m, 2H), 7.08 – 7.01 (m, 3H), 6.98 (s, 1H), 6.92 – 6.83 (m, 2H), 4.24 (ddd,  $J = 9.6, 8.1, 4.6$  Hz, 1H), 2.84 (dd,  $J = 13.9, 4.6$  Hz, 1H), 2.67 (dd,  $J = 13.9, 9.6$  Hz, 1H), 2.34 – 2.22 (m, 1H), 2.06 (ddd,  $J = 9.2, 7.8, 5.6$  Hz, 1H), 1.34 (ddd,  $J = 7.2, 5.6, 4.1$  Hz, 1H), 1.13 (ddd,  $J = 8.8, 7.8, 4.1$  Hz, 1H).  $^{13}\text{C}$  NMR (101 MHz, DMSO- $d_6$ )  $\delta$  173.4, 168.6, 138.1, 137.7, 129.0, 129.0, 128.0, 127.4, 126.1, 125.6, 53.8, 37.4, 24.0, 22.1, 9.9. HRMS (ESI $^+$ )  $m/z$  calcd.  $\text{C}_{19}\text{H}_{20}\text{N}_2\text{NaO}_2^+$  [M+Na] $^+$ : 331.1417, found: 331.1413.

***cis-N-((S)-1-amino-3-methyl-1-oxopentan-2-yl)-2-(p-tolyl)cyclopropanecarboxamide (3g)***

Substrate (0.2 mmol), aryl iodide (1.5 equiv), Pd(OAc) $_2$  (0.1 equiv), K $_2$ CO $_3$  (2.0 equiv) in *tert*-Amyl alcohol (0.4 mL), 100 °C, 24 h. Yield 63% (d.r. = 16.5:1). The diastereomeric ratio was determined by HPLC analysis on C18 column (TFA:MeCN:H $_2$ O = 0.1:30:70, flow rate 0.5 mL/min,  $\lambda = 254$  nm,  $\tau_{\text{minor}} = 7.34$  min,  $\tau_{\text{major}} = 10.2$  min.)

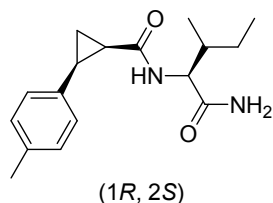

Yield 59% (34 mg). mp 202-203 °C. White solid. <sup>1</sup>H NMR (400 MHz, DMSO-*d*<sub>6</sub>) δ 7.81 (d, *J* = 8.9 Hz, 1H), 7.24 (s, 1H), 7.04 (d, *J* = 7.8 Hz, 2H), 6.96 (d, *J* = 7.7 Hz, 2H), 6.90 (s, 1H), 3.85 (t, *J* = 8.2 Hz, 1H), 2.33 – 2.27 (m, 1H), 2.21 (s, 3H), 2.13 (ddd, *J* = 9.6, 7.6, 5.7 Hz, 1H), 1.55 – 1.38 (m, 2H), 1.32 – 1.06 (m, 2H), 0.91 – 0.77 (m, 1H), 0.69 – 0.58 (m, 6H). <sup>13</sup>C NMR (101 MHz, DMSO-*d*<sub>6</sub>) δ 173.8, 168.7, 135.0, 135.0, 129.3, 128.4, 57.1, 36.6, 24.5, 24.1, 23.5, 21.1, 15.7, 9.6 HRMS (ESI<sup>+</sup>) *m/z* calcd. C<sub>17</sub>H<sub>24</sub>N<sub>2</sub>NaO<sub>2</sub><sup>+</sup> [M+Na]<sup>+</sup>: 311.1730, found: 311.1707.

***cis*-N-((2*S*, 3*R*)-1-amino-3-methyl-1-oxopentan-2-yl)-2-(4-(*tert*-butyl)phenyl)cyclopropanecarboxamide(3h)**

Substrate (0.2 mmol), aryl iodide (2.0 equiv), Pd(OAc)<sub>2</sub> (0.1 equiv), K<sub>2</sub>CO<sub>3</sub> (2.0 equiv) in *tert*-Amyl alcohol (0.4 mL), 100 °C, 24 h. Yield 62% (d.r. = 18:1) The diastereomeric ratio was determined by HPLC analysis on C18 column (TFA:MeCN:H<sub>2</sub>O = 0.1:40:60, flow rate 0.5 mL/min, λ = 254 nm, τ<sub>minor</sub> = 10.0 min, τ<sub>major</sub> = 12.7 min.)

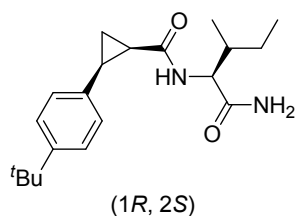

Yield 58% (38.5 mg). mp 198-199 °C. White solid. <sup>1</sup>H NMR (400 MHz, DMSO-*d*<sub>6</sub>) δ 7.80 (d, *J* = 9.0 Hz, 1H), 7.26 (s, 1H), 7.17 (d, *J* = 8.2 Hz, 2H), 7.08 (d, *J* = 8.2 Hz, 2H), 6.92 (s, 1H), 3.88 (dd, *J* = 9.0, 7.2 Hz, 1H), 2.34 – 2.27 (m, 1H), 2.15 (ddd, *J* = 9.5, 7.7, 5.7 Hz, 1H), 1.54 – 1.42 (m, 2H), 1.23 (s, 9H), 1.20 – 1.05 (m, 2H), 0.80 (ddd, *J* = 13.6, 9.0, 7.2 Hz, 1H), 0.61 (t, *J* = 7.4 Hz, 3H), 0.55 (d, *J* = 6.8 Hz, 3H). <sup>13</sup>C NMR (101 MHz, DMSO-*d*<sub>6</sub>) δ 173.7, 168.4, 148.3, 134.8, 128.9, 124.5, 56.9, 36.6, 34.4, 31.6, 24.4, 23.9, 23.8, 15.6, 11.2, 9.4. HRMS (ESI<sup>+</sup>) *m/z* calcd. C<sub>20</sub>H<sub>30</sub>N<sub>2</sub>NaO<sub>2</sub><sup>+</sup> [M+Na]<sup>+</sup>: 353.2199, found: 353.2211.

***cis*-N-((*S*)-1-amino-3-methyl-1-oxopentan-2-yl)-2-([1,1'-biphenyl]-4-yl)cyclopropanecarboxamide (3i)**

Substrate (0.2 mmol), aryl iodide (1.5 equiv), Pd(OAc)<sub>2</sub> (0.1 equiv), K<sub>2</sub>CO<sub>3</sub> (2.0 equiv) in *tert*-Amyl alcohol (0.4 mL), 100 °C, 24 h. Yield 68% (d.r. = 10.9:1). The diastereomeric ratio was determined by HPLC analysis on C18 column (TFA:MeCN:H<sub>2</sub>O = 0.1:40:60, flow rate 0.5 mL/min, λ = 254 nm, τ<sub>minor</sub> = 7.8 min, τ<sub>major</sub> = 8.7 min.)

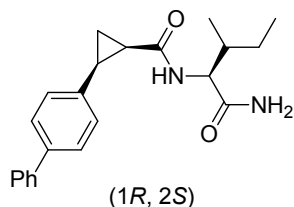

Yield 63% (44 mg). mp 217 °C. White solid. <sup>1</sup>H NMR (400 MHz, DMSO-*d*<sub>6</sub>) δ 7.88 (d, *J* = 8.9 Hz, 1H), 7.59 (d, *J* = 7.7 Hz, 2H), 7.50 – 7.39 (m, 4H), 7.37 – 7.22 (m, 4H), 6.91 (s, 1H), 3.88 (t, *J* = 8.2 Hz, 1H), 2.43 – 2.37 (m, 1H), 2.22 (td, *J* = 8.4, 5.7 Hz, 1H), 1.55 – 1.47 (m, 2H), 1.23 – 1.11 (m, 2H), 0.92 – 0.76 (m, 1H), 0.62 – 0.58 (m, 6H). <sup>13</sup>C NMR (101 MHz, DMSO-*d*<sub>6</sub>) δ 173.2, 168.0, 140.1, 137.6, 137.0, 129.4, 128.9, 127.1, 126.3, 125.6, 56.6, 40.1, 39.9, 39.7, 39.5, 39.3, 39.1, 38.9, 36.1, 24.0, 23.6, 23.4, 15.2, 10.7, 9.3. HRMS (ESI<sup>+</sup>) *m/z* calcd. C<sub>22</sub>H<sub>26</sub>N<sub>2</sub>NaO<sub>2</sub><sup>+</sup> [M+Na]<sup>+</sup>: 373.1886, found: 373.1875.

***cis*-*N*-((*S*)-1-amino-3-methyl-1-oxopentan-2-yl)-2-(4-methoxyphenyl)cyclopropanecarboxamide (3j)**

Substrate (0.2 mmol), aryl iodide (1.5 equiv), Pd(OAc)<sub>2</sub> (0.1 equiv), K<sub>2</sub>CO<sub>3</sub> (2.0 equiv) in *tert*-Amyl alcohol (0.4 mL), 100 °C, 24 h. Yield 58% (d.r. = 17.1:1) The diastereomeric ratio was determined by HPLC analysis on C18 column (TFA:MeCN:H<sub>2</sub>O = 0.1:20:80, flow rate 0.5 mL/min, λ = 254 nm, τ<sub>minor</sub> = 4.5 min, τ<sub>major</sub> = 5.1 min.)

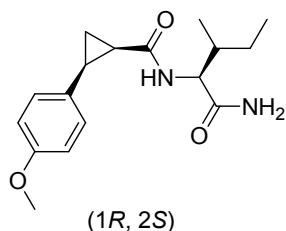

Yield 55% (33.6 mg). mp 186-187 °C. White solid. <sup>1</sup>H NMR (400 MHz, DMSO-*d*<sub>6</sub>) δ 7.82 (d, *J* = 8.9 Hz, 1H), 7.26 (s, 1H), 7.07 (d, *J* = 8.4 Hz, 2H), 6.91 (s, 1H), 6.73 (d, *J* = 8.4 Hz, 2H), 3.88 (dd, *J* = 8.9, 7.2 Hz, 1H), 3.68 (s, 3H), 2.32 – 2.26 (m, 1H), 2.11 (ddd, *J* = 9.7, 7.7, 5.7 Hz, 1H), 1.57 – 1.38 (m, 2H), 1.26 – 1.05 (m, 2H), 0.92

– 0.78 (m, 1H), 0.69 – 0.59 (m, 6H). <sup>13</sup>C NMR (101 MHz, DMSO-*d*<sub>6</sub>) δ 173.3, 168.2, 157.5, 129.9, 129.4, 112.8, 56.6, 54.9, 36.2, 24.1, 23.3, 23.0, 15.2, 10.8, 9.2. HRMS (ESI<sup>+</sup>) *m/z* calcd. C<sub>17</sub>H<sub>24</sub>N<sub>2</sub>NaO<sub>3</sub><sup>+</sup> [M+Na]<sup>+</sup>: 327.1679, found: 327.1678.

***cis-N-((2S, 3R)-1-amino-3-methyl-1-oxopentan-2-yl)-2-(3,5-dimethylphenyl)cyclopropanecarboxamide (3k)***

Substrate (0.2 mmol), aryl iodide (3.0 equiv), Pd(OAc)<sub>2</sub> (0.1 equiv), K<sub>2</sub>CO<sub>3</sub> (2.5 equiv) in *tert*-Amyl alcohol (0.4 mL), 100 °C, 24 h. Yield 72% (d.r. = 30.1:1). The diastereomeric ratio was determined by HPLC analysis on C18 column (TFA:MeCN:H<sub>2</sub>O = 0.1:25:75, flow rate 0.5 mL/min, λ = 254 nm, τ<sub>minor</sub> = 25.4 min, τ<sub>major</sub> = 42.4 min.)

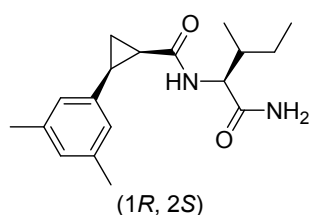

Yield 69% (41.8 mg). mp 184-185 °C. White solid. <sup>1</sup>H NMR (400 MHz, DMSO-*d*<sub>6</sub>) δ 7.85 (d, *J* = 8.9 Hz, 1H), 7.27 (s, 1H), 6.93 (s, 1H), 6.76 (s, 2H), 6.73 (s, 1H), 3.91 (dd, *J* = 8.9, 7.2 Hz, 1H), 2.33 – 2.22 (m, 1H), 2.17-2.10 (m, 7H), 1.62 – 1.47 (m, 1H), 1.41 (ddd, *J* = 7.1, 5.6, 4.1 Hz, 1H), 1.31 – 1.21 (m, 1H), 1.08 (td, *J* = 8.1, 4.2 Hz, 1H), 0.96 – 0.82 (m, 1H), 0.75 – 0.59 (m, 6H). <sup>13</sup>C NMR (101 MHz, DMSO-*d*<sub>6</sub>) δ 173.3, 168.2, 137.5, 136.0, 127.3, 126.9, 56.6, 36.3, 24.1, 23.8, 22.6, 20.9, 15.2, 11.0, 9.1. HRMS (ESI<sup>+</sup>) *m/z* calcd. : C<sub>18</sub>H<sub>26</sub>N<sub>2</sub>NaO<sub>2</sub><sup>+</sup> [M+Na]<sup>+</sup>: 325.1886, found: 325.1886.

***cis-N-((2S, 3R)-1-amino-3-methyl-1-oxopentan-2-yl)-2-(3,5-dichlorophenyl)cyclopropanecarboxamide (3l)***

Substrate (0.2 mmol), aryl iodide (1.5 equiv), Pd(OAc)<sub>2</sub> (0.1 equiv), K<sub>2</sub>CO<sub>3</sub> (2.0 equiv) in *tert*-Amyl alcohol (0.4 mL), 100 °C, 24 h. Yield 41% (d.r. = 71.5:1) The diastereomeric ratio was determined by HPLC analysis on C18 column (TFA:MeCN:H<sub>2</sub>O = 0.1:30:70, flow rate 0.5 mL/min, λ = 254 nm, τ<sub>minor</sub> = 16.3 min, τ<sub>major</sub> = 28.8 min.)



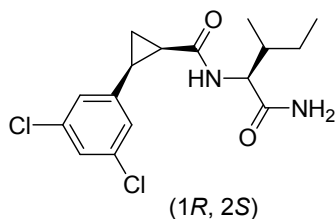

Yield 40% (27.5 mg). mp 212-214 °C. White solid.  $^1\text{H}$  NMR (400 MHz,  $\text{DMSO-}d_6$ )  $\delta$  8.01 (d,  $J = 9.0$  Hz, 1H), 7.34-7.33 (m, 2H), 7.18 (d,  $J = 2.0$  Hz, 2H), 6.93 (s, 1H), 3.92 (dd,  $J = 9.0, 7.4$  Hz, 1H), 2.44 – 2.38 (m, 1H), 2.24 (ddd,  $J = 9.5, 7.7, 5.7$  Hz, 1H), 1.59 – 1.44 (m, 2H), 1.23 – 1.15 (m, 2H), 0.89 – 0.82 (m, 1H), 0.71 – 0.56 (m, 6H).  $^{13}\text{C}$  NMR (101 MHz,  $\text{DMSO-}d_6$ )  $\delta$  173.5, 168.1, 142.8, 133.4, 128.2, 125.9, 56.9, 36.6, 24.5, 23.9, 23.6, 15.5, 11.2, 10.0. HRMS (ESI<sup>+</sup>)  $m/z$  calcd.  $\text{C}_{16}\text{H}_{20}\text{Cl}_2\text{N}_2\text{NaO}_2^+$   $[\text{M}+\text{Na}]^+$ : 365.0794, found: 365.0799.

***cis-N-((2S, 3R)-1-amino-3-methyl-1-oxopent-2-yl)-2-(3,5-di-*tert*-butylphenyl)cyclopropanecarboxamide (3m)***

Substrate (0.2 mmol), aryl iodide (3.0 equiv),  $\text{Pd}(\text{OAc})_2$  (0.1 equiv),  $\text{K}_2\text{CO}_3$  (2.5 equiv) in *tert*-Amyl alcohol (0.4 mL), 100 °C, 24 h. Yield 78% (d.r. = 10.4:1). The diastereomeric ratio was determined by HPLC analysis on C18 column (TFA:MeCN:H<sub>2</sub>O = 0.1:50:50, flow rate 0.5 mL/min,  $\lambda = 254$  nm,  $\tau_{\text{minor}} = 12.7$  min,  $\tau_{\text{major}} = 16.2$  min.)

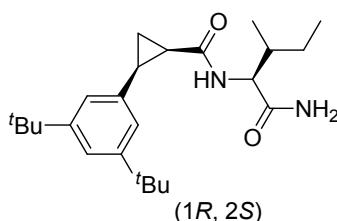

Yield 72% (55 mg). mp 62-64 °C. White solid.  $^1\text{H}$  NMR (400 MHz,  $\text{DMSO-}d_6$ )  $\delta$  7.71 (d,  $J = 9.0$  Hz, 1H), 7.25 (s, 1H), 7.13 (t,  $J = 1.8$  Hz, 1H), 6.98 (d,  $J = 1.8$  Hz, 2H), 6.92 (s, 1H), 3.93 (dd,  $J = 9.0, 6.8$  Hz, 1H), 2.51 – 2.49 (m, 1H), 2.17 (ddd,  $J = 9.4, 7.8, 5.7$  Hz, 1H), 1.54 – 1.41 (m, 2H), 1.24 (s, 18H), 1.20 – 1.07 (m, 2H), 0.80 – 0.73 (m, 1H), 0.59 (t,  $J = 7.3$  Hz, 3H), 0.51 (d,  $J = 6.7$  Hz, 3H).  $^{13}\text{C}$  NMR (101 MHz,  $\text{DMSO-}d_6$ )  $\delta$  173.6, 168.5, 149.3, 136.8, 123.1, 119.8, 57.0, 36.8, 34.7, 31.7, 25.1, 24.6, 24.1, 15.5, 11.5, 9.9. HRMS (ESI<sup>+</sup>)  $m/z$  calcd.  $\text{C}_{24}\text{H}_{38}\text{N}_2\text{NaO}_2^+$   $[\text{M}+\text{Na}]^+$ : 409.2825, found: 409.2877.

***cis-N-((S)-1-amino-3-methyl-1-oxopent-2-yl)-2-(4-bromophenyl)cyclopropanecarboxamide (3n)***

Substrate (0.2 mmol), aryl iodide (1.5 equiv), Pd(OAc)<sub>2</sub> (0.1 equiv), K<sub>2</sub>CO<sub>3</sub> (2.0 equiv) in *tert*-Amylalcohol (0.4 mL), 100 °C, 24 h. Yield 55% (d.r. =10.9:1) The diastereomeric ratio was determined by HPLC analysis on C18 column (TFA:MeCN:H<sub>2</sub>O = 0.1:40:60, flow rate 0.5 mL/min, λ = 254 nm, τ<sub>minor</sub> = 4.10 min, τ<sub>major</sub> = 4.94 min.)

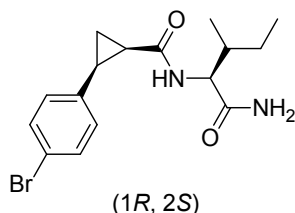

Yield 51% (35 mg). mp 214-215 °C. White solid. <sup>1</sup>H NMR (400 MHz, DMSO-*d*<sub>6</sub>) δ 7.89 (d, *J* = 8.9 Hz, 1H), 7.34 (d, *J* = 8.2 Hz, 2H), 7.31 – 7.25 (m, 1H), 7.11 (d, *J* = 8.2 Hz, 2H), 6.91 (s, 1H), 3.87 (dd, *J* = 8.9, 7.5 Hz, 1H), 2.37 – 2.31 (m, 1H), 2.19 (ddd, *J* = 9.8, 7.7, 5.6 Hz, 1H), 1.53 – 1.45 (m, 2H), 0.90 – 0.74 (m, 1H), 0.67 – 0.57 (m, 6H). <sup>13</sup>C NMR (101 MHz, DMSO-*d*<sub>6</sub>) δ 173.2, 167.9, 137.2, 131.1, 130.1, 118.8, 56.5, 36.1, 24.0, 23.4, 23.3, 15.2, 10.7, 9.3. HRMS (ESI<sup>+</sup>) *m/z* calcd. C<sub>16</sub>H<sub>21</sub>BrN<sub>2</sub>NaO<sub>2</sub><sup>+</sup> [M+Na]<sup>+</sup>: 375.0679, found: 375.0688.

***cis*-N-((2S, 3R)-1-amino-3-methyl-1-oxopent-2-yl)-2-(4-chlorophenyl)cyclopropanecarboxamide (3o)**

Substrate (0.2 mmol), aryl iodide (2.5 equiv), Pd(OAc)<sub>2</sub> (0.1 equiv), K<sub>2</sub>CO<sub>3</sub> (2.0 equiv) in *tert*-Amylalcohol (0.4 mL), 100 °C, 24 h. Yield 55% (d.r. = 15.8:1) The diastereomeric ratio was determined by HPLC analysis on C18 column (TFA:MeCN:H<sub>2</sub>O = 0.1:20:80 to 0.1:30:70, flow rate 0.5 mL/min, λ = 254 nm, τ<sub>minor</sub> = 36.4 min, τ<sub>major</sub> = 69.5 min.)

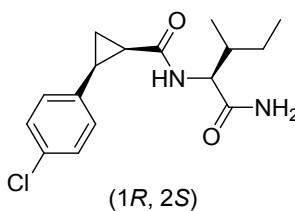

Yield 52% (32 mg). mp 217-218 °C. White solid. <sup>1</sup>H NMR (400 MHz, DMSO-*d*<sub>6</sub>) δ 7.90 (d, *J* = 9.0 Hz, 1H), 7.29 (s, 1H), 7.21 (d, *J* = 8.6 Hz, 2H), 7.17 (d, *J* = 8.6 Hz, 2H), 6.92 (s, 1H), 3.87 (dd, *J* = 9.0, 7.5 Hz, 1H), 2.39 – 2.33 (m, 1H), 2.19 (ddd, *J* = 9.4, 7.8, 5.7 Hz, 1H), 1.55 – 1.43 (m, 2H), 1.21 – 1.06 (m, 2H), 0.90 – 0.74 (m, 1H), 0.67 – 0.54 (m, 6H). <sup>13</sup>C NMR (101 MHz, DMSO-*d*<sub>6</sub>) δ 173.7, 168.3, 137.2, 131.1, 130.8, 127.64, 57.0, 36.5, 24.4, 23.8, 23.7, 15.6, 11.2, 9.8. HRMS (ESI<sup>+</sup>) *m/z* calcd. C<sub>16</sub>H<sub>21</sub>ClN<sub>2</sub>NaO<sub>2</sub><sup>+</sup> [M+Na]<sup>+</sup>: 331.1184, found:

331.1171.

***cis*-N-((2*S*, 3*R*)-1-amino-3-methyl-1-oxopentan-2-yl)-2-(4-fluorophenyl)cyclopropanecarboxamide (3p)**

Substrate (0.2 mmol), aryl iodide (3.0 equiv), Pd(OAc)<sub>2</sub> (0.1 equiv), K<sub>2</sub>CO<sub>3</sub> (2.5 equiv) in *tert*-Amyl alcohol (0.4 mL), 100 °C, 24 h. Yield 57% (d.r. = 11.4:1). The diastereomeric ratio was determined by HPLC analysis on C18 column (TFA:MeCN:H<sub>2</sub>O = 0.1:20:80, flow rate 0.5 mL/min, λ = 254 nm, τ<sub>minor</sub> = 10.9 min, τ<sub>major</sub> = 21.4 min.)

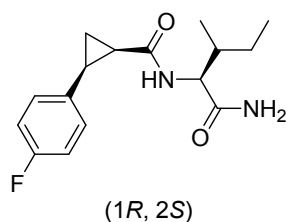

Yield 53% (31 mg). mp 206-207 °C. White solid. <sup>1</sup>H NMR (400 MHz, DMSO-*d*<sub>6</sub>) δ 7.88 (d, *J* = 9.0 Hz, 1H), 7.28 (s, 1H), 7.22 – 7.14 (m, 2H), 7.04 – 6.93 (m, 2H), 6.92 (s, 1H), 3.88 (dd, *J* = 9.0, 7.4 Hz, 1H), 2.38 – 2.32 (m, 1H), 2.17 (ddd, *J* = 9.4, 7.8, 5.7 Hz, 1H), 1.57 – 1.42 (m, 2H), 1.20 – 1.08 (m, 2H), 0.91 – 0.77 (m, 1H), 0.68 – 0.56 (m, 6H). <sup>13</sup>C NMR (101 MHz, DMSO-*d*<sub>6</sub>) δ 173.7, 168.4, 161.1 (d, *J* = 241 Hz), 134.1 (d, *J* = 3 Hz), 131.03 (d, *J* = 8 Hz), 114.39 (d, *J* = 21 Hz), 57.0, 36.5, 24.4, 23.6, 15.6, 11.2, 9.8. HRMS (ESI<sup>+</sup>) *m/z* calcd. C<sub>16</sub>H<sub>21</sub>FN<sub>2</sub>NaO<sub>2</sub><sup>+</sup> [M+Na]<sup>+</sup>: 315.1479, found: 315.1465.

***cis*-N-((2*S*, 3*R*)-1-amino-3-methyl-1-oxopentan-2-yl)-2-(4-(trifluoromethyl)phenyl)cyclopropanecarboxamide (3q)**

Substrate (0.2 mmol), aryl iodide (2.0 equiv), Pd(OAc)<sub>2</sub> (0.1 equiv), K<sub>2</sub>CO<sub>3</sub> (2.0 equiv) in *tert*-Amyl alcohol (0.4 mL), 100 °C, 24 h. Yield 52% (d.r. = 20.4:1) The diastereomeric ratio was determined by HPLC analysis on C18 column (TFA:MeCN:H<sub>2</sub>O = 0.1:25:75, flow rate 0.5 mL/min, λ = 254 nm, τ<sub>minor</sub> = 31.0 min, τ<sub>major</sub> = 51.9 min.)

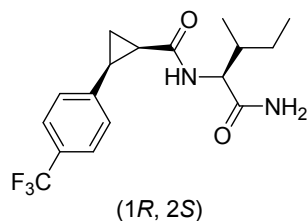

Yield 50% (34 mg). mp 202-203 °C. White solid. <sup>1</sup>H NMR (400 MHz, DMSO-*d*<sub>6</sub>) δ 7.94 (d, *J* = 9.0 Hz, 1H), 7.51 (d, *J* = 7.8 Hz, 2H), 7.37 (d, *J* = 7.8 Hz, 2H), 7.30 (s, 1H), 6.93 (s, 1H), 3.86 (dd, *J* = 9.0, 7.5 Hz, 1H), 2.48 – 2.43 (m, 1H), 2.27 (ddd, *J* = 9.5, 7.8, 5.8 Hz, 1H), 1.58 (ddd, *J* = 7.2, 5.8, 4.5 Hz, 1H), 1.50 – 1.42 (m, 1H), 1.22 (td, *J* = 8.1, 4.5 Hz, 1H), 1.13 – 1.03 (m, 1H), 0.83 – 0.68 (m, 1H), 0.61 – 0.50 (m, 6H). <sup>13</sup>C NMR (101 MHz, DMSO-*d*<sub>6</sub>) δ 173.6, 168.1, 143.2, 130.0, 126.9 (q, *J* = 31 Hz), 124.9 (q, *J* = 272 Hz), 124.5 (q, *J* = 4 Hz), 56.9, 36.5, 24.3, 24.1, 15.5, 11.0, 9.8. HRMS (ESI<sup>+</sup>) *m/z* calcd. C<sub>17</sub>H<sub>21</sub>F<sub>3</sub>N<sub>2</sub>NaO<sub>2</sub><sup>+</sup> [M+Na]<sup>+</sup>: 365.1447, found: 365.1433.

**methyl 4-(*cis*-2-(((2*S*, 3*R*)-1-amino-3-methyl-1-oxopentan-2-yl)carbamoyl)cyclopropyl)benzoate (3r)**

Substrate (0.2 mmol), aryl iodide (2.0 equiv), Pd(OAc)<sub>2</sub> (0.1 equiv), K<sub>2</sub>CO<sub>3</sub> (2.0 equiv) in *tert*-Amyl alcohol (0.4 mL), 100 °C, 24 h. Yield 50% (d.r. = 7.8:1). The diastereomeric ratio was determined by HPLC analysis on C18 column (TFA:MeCN:H<sub>2</sub>O = 0.1:15:85 to 0.1:20:80, flow rate 0.5 mL/min, λ = 254 nm, τ<sub>minor</sub> = 51.1 min, τ<sub>major</sub> = 56.9 min.)

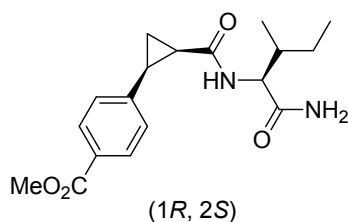

Yield 44% (26.9 mg). mp 186-187 °C. White solid. <sup>1</sup>H NMR (400 MHz, DMSO-*d*<sub>6</sub>) δ 7.93 (d, *J* = 9.0 Hz, 1H), 7.77 (d, *J* = 8.3 Hz, 1H), 7.31 – 7.29 (m, 3H), 6.92 (s, 1H), 3.85 (dd, *J* = 9.0, 7.5 Hz, 1H), 3.81 (s, 3H), 2.51 – 2.49 (m, 1H), 2.27 (ddd, *J* = 9.5, 7.7, 5.8 Hz, 1H), 1.56 (ddd, *J* = 7.2, 5.8, 4.4 Hz, 1H), 1.51 – 1.44 (m, 1H), 1.24 – 1.19 (m, 1H), 1.15 – 1.05 (m, 1H), 0.86 – 0.70 (m, 1H), 0.60 – 0.56 (m, 6H). <sup>13</sup>C NMR (101 MHz, DMSO-*d*<sub>6</sub>) δ 173.6, 168.2, 166.7, 144.2, 129.6, 128.7, 127.5, 57.0, 52.4, 36.5, 24.4, 24.3, 15.6, 11.1, 10.0. HRMS (ESI<sup>+</sup>) *m/z* calcd. C<sub>18</sub>H<sub>24</sub>N<sub>2</sub>NaO<sub>4</sub><sup>+</sup> [M+Na]<sup>+</sup>: 355.1628, found: 355.1638.

***cis*-2-(4-acetylphenyl)-*N*-((2*S*, 3*R*)-1-amino-3-methyl-1-oxopentan-2-yl)cyclopropanecarboxamide (3s)**

Substrate (0.2 mmol), aryl iodide (1.5 equiv), Pd(OAc)<sub>2</sub> (0.1 equiv), K<sub>2</sub>CO<sub>3</sub> (2.0 equiv) in *tert*-Amyl alcohol (0.4 mL), 100 °C, 24 h. Yield 34% (d.r. = 6.3:1) The diastereomeric ratio was determined by HPLC analysis on C18 column (TFA:IPA:H<sub>2</sub>O = 0.1:10:90, flow rate 0.5 mL/min, λ = 254 nm, τ<sub>minor</sub> = 12.1 min, τ<sub>major</sub> = 14.1 min.)

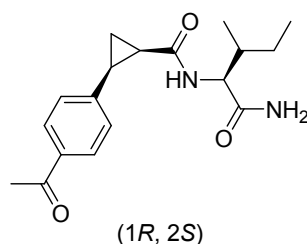

Yield 30% (18.7 mg). mp 197-198 °C. White solid. <sup>1</sup>H NMR (400 MHz, Methanol-*d*<sub>4</sub>) δ 7.89 – 7.81 (m, 2H), 7.39 – 7.32 (m, 2H), 3.95 (d, *J* = 7.5 Hz, 1H), 2.60 – 2.53 (m, 4H), 2.28 (ddd, *J* = 9.5, 7.8, 5.8 Hz, 1H), 1.75 (ddd, *J* = 7.3, 5.8, 5.1 Hz, 1H), 1.64 – 1.57 (m, 1H), 1.32 (ddd, *J* = 8.5, 7.8, 5.1 Hz, 1H), 1.28 – 1.16 (m, 1H), 0.94 – 0.81 (m, 1H), 0.74 – 0.64 (m, 6H). <sup>13</sup>C NMR (101 MHz, Methanol-*d*<sub>4</sub>) δ 200.2, 176.5, 171.3, 145.0, 136.5, 130.3, 129.0, 58.8, 37.8, 26.6, 25.6, 25.5, 25.3, 15.7, 11.3, 10.3. HRMS (ESI<sup>+</sup>) *m/z* calcd. C<sub>18</sub>H<sub>24</sub>N<sub>2</sub>NaO<sub>3</sub><sup>+</sup> [M+Na]<sup>+</sup>: 339.1679, found: 339.1678.

***cis*-*N*-((2*S*, 3*R*)-1-amino-3-methyl-1-oxopentan-2-yl)-2-(*m*-tolyl)cyclopropanecarboxamide (3t)**

Substrate (0.2 mmol), aryl iodide (2.0 equiv), Pd(OAc)<sub>2</sub> (0.1 equiv), K<sub>2</sub>CO<sub>3</sub> (2.0 equiv) in *tert*-Amyl alcohol (0.4 mL), 100 °C, 24 h. Yield 59% (d.r. = 17.9 :1). The diastereomeric ratio was determined by HPLC analysis on C18 column (TFA:MeCN:H<sub>2</sub>O = 0.1:25:75, flow rate 0.5 mL/min, λ = 254 nm, τ<sub>minor</sub> = 10.0 min, τ<sub>major</sub> = 12.7 min.)

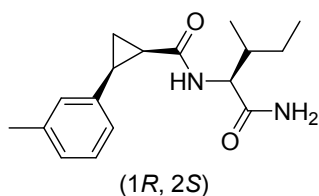

Yield 57% (33 mg). mp 172-173 °C. White solid. <sup>1</sup>H NMR (400 MHz, DMSO-*d*<sub>6</sub>) δ 7.85 (d, *J* = 9.0 Hz, 1H), 7.27 (s, 1H), 7.05 (t, *J* = 7.5 Hz, 1H), 7.00 – 6.87 (m, 4H), 3.89 (dd, *J* = 9.0, 7.3 Hz, 1H), 2.36 – 2.26 (m, 1H), 2.21 (s, 3H), 2.15 (ddd, *J* = 9.4, 7.7, 5.7 Hz, 1H), 1.56 – 1.50 (m, 1H), 1.44 (ddd, *J* = 7.2, 5.7, 4.2 Hz, 1H), 1.27

– 1.17 (m, 1H), 1.14 – 1.09 (m, 1H), 0.95 – 0.79 (m, 1H), 0.70 – 0.58 (m, 6H).  $^{13}\text{C}$  NMR (101 MHz,  $\text{DMSO-}d_6$ )  $\delta$  173.7, 168.58, 138.0, 136.6, 130.1, 127.7, 126.9, 126.5, 57.0, 36.6, 24.5, 24.3, 23.3, 21.4, 15.6, 11.3, 9.6. HRMS (ESI<sup>+</sup>)  $m/z$  calcd.  $\text{C}_{17}\text{H}_{24}\text{N}_2\text{NaO}_2^+ [\text{M}+\text{Na}]^+$ : 311.1730, found: 311.1725.

***cis-N-((2S, 3R)-1-amino-3-methyl-1-oxopentan-2-yl)-2-(3-nitrophenyl)cyclopropanecarboxamide (3u)***

Substrate (0.2 mmol), aryl iodide (3.0 equiv),  $\text{Pd}(\text{OAc})_2$  (0.1 equiv),  $\text{K}_2\text{CO}_3$  (2.5 equiv) in *tert*-Amyl alcohol (0.4 mL), 100 °C, 24 h. Yield 28% (d.r. 10.1:1). The diastereomeric ratio was determined by HPLC analysis on C18 column (TFA:MeCN:H<sub>2</sub>O = 0.1:25:75, flow rate 0.5 mL/min,  $\lambda$  = 254 nm,  $\tau_{\text{minor}}$  = 16.2 min,  $\tau_{\text{major}}$  = 26.4 min.)

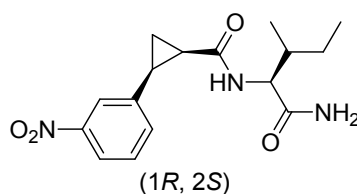

Yield 25% (15.9 mg). mp 185-187 °C. White solid.  $^1\text{H}$  NMR (400 MHz,  $\text{DMSO-}d_6$ )  $\delta$  8.06 – 7.96 (m, 3H), 7.64 (d,  $J$  = 7.7 Hz, 1H), 7.49 (td,  $J$  = 7.7, 0.8 Hz, 1H), 7.30 (s, 1H), 6.92 (s, 1H), 3.86 (dd,  $J$  = 9.0, 7.5 Hz, 1H), 2.58 – 2.52 (m, 1H), 2.29 (ddd,  $J$  = 9.4, 7.7, 5.7 Hz, 1H), 1.59 (ddd,  $J$  = 7.2, 5.7, 4.6 Hz, 1H), 1.51 – 1.43 (m, 1H), 1.26 (td,  $J$  = 8.1, 4.6 Hz, 1H), 1.13 – 1.05 (m, 1H), 0.84 – 0.68 (m, 1H), 0.60 – 0.49 (m, 6H).  $^{13}\text{C}$  NMR (101 MHz,  $\text{DMSO-}d_6$ )  $\delta$  173.5, 168.2, 147.6, 140.7, 136.3, 129.2, 123.9, 121.2, 56.9, 36.5, 24.4, 24.0, 23.8, 15.5, 11.0, 10.0. HRMS (ESI<sup>+</sup>)  $m/z$  calcd.  $\text{C}_{16}\text{H}_{21}\text{N}_3\text{NaO}_4^+ [\text{M}+\text{Na}]^+$ : 342.1424, found: 342.1417.

***cis-N-((2S, 3R)-1-amino-3-methyl-1-oxopentan-2-yl)-2-(4-nitrophenyl)cyclopropanecarboxamide (3v)***

Substrate (0.2 mmol), aryl iodide (3.0 equiv),  $\text{Pd}(\text{OAc})_2$  (0.1 equiv),  $\text{K}_2\text{CO}_3$  (2.5 equiv) in *tert*-Amyl alcohol (0.4 mL), 100 °C, 24 h. Yield 32% (d.r. = 6.3:1). The diastereomeric ratio was determined by HPLC analysis on C18 column (TFA:MeCN:H<sub>2</sub>O = 0.1:25:75, flow rate 0.5 mL/min,  $\lambda$  = 254 nm,  $\tau_{\text{minor}}$  = 16.0 min,  $\tau_{\text{major}}$  = 23.9 min.)

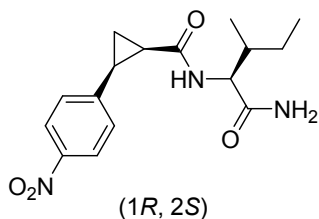

Yield 28% (17.8 mg). mp 197-198 °C. brown solid. <sup>1</sup>H NMR (400 MHz, Methanol-*d*<sub>4</sub>) δ 8.13 – 8.04 (m, 2H), 7.50 – 7.41 (m, 2H), 3.95 (d, *J* = 7.6 Hz, 1H), 2.65 – 2.59 (m, 1H), 2.33 (ddd, *J* = 9.5, 7.8, 5.8 Hz, 1H), 1.78 (ddd, *J* = 7.3, 5.8, 5.1 Hz, 1H), 1.65 – 1.58 (m, 1H), 1.38 (ddd, *J* = 8.5, 7.9, 5.1 Hz, 1H), 1.26 – 1.16 (m, 1H), 0.97 – 0.80 (m, 1H), 0.74 – 0.65 (m, 6H). <sup>13</sup>C NMR (101 MHz, Methanol-*d*<sub>4</sub>) δ 176.4, 171.1, 147.9, 147.1, 131.1, 123.79, 58.7, 37.7, 25.6, 25.5, 25.4, 15.7, 11.2, 10.7. HRMS (ESI<sup>+</sup>) *m/z* calcd. C<sub>16</sub>H<sub>21</sub>N<sub>3</sub>NaO<sub>4</sub><sup>+</sup> [M+Na]<sup>+</sup>: 342.1424, found: 342.1395.

***cis*-*N*-((2*S*, 3*R*)-1-amino-3-methyl-1-oxopentan-2-yl)-2-(2-methoxyphenyl)cyclopropanecarboxamide (3w)**

Substrate (0.2 mmol), aryl iodide (3.0 equiv), Pd(OAc)<sub>2</sub> (0.1 equiv), K<sub>2</sub>CO<sub>3</sub> (2.5 equiv) in *tert*-Amyl alcohol (0.4 mL), 120 °C, 24 h. Yield 73% (d.r. = 7.9:1) The diastereomeric ratio was determined by HPLC analysis on C18 column (TFA:MeCN:H<sub>2</sub>O = 0.1:20:80, flow rate 0.5 mL/min, λ = 254 nm, τ<sub>minor</sub> = 19.9 min, τ<sub>major</sub> = 24.9 min.)

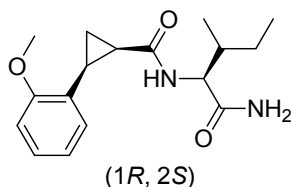

Yield 65% (40 mg). mp 168-170 °C. White solid. <sup>1</sup>H NMR (400 MHz, DMSO-*d*<sub>6</sub>) δ 7.64 (d, *J* = 9.0 Hz, 1H), 7.20 (s, 1H), 7.12 – 7.08 (m, 1H), 7.04 (dd, *J* = 7.5, 1.1 Hz, 1H), 6.90 (s, 1H), 6.83 (dd, *J* = 8.3, 1.1 Hz, 1H), 6.76 (td, *J* = 7.5, 1.1 Hz, 1H), 3.84 (dd, *J* = 9.0, 7.3 Hz, 1H), 3.74 (s, 3H), 2.32 – 2.25 (m, 1H), 2.17 (ddd, *J* = 9.3, 7.8, 5.5 Hz, 1H), 1.58 – 1.39 (m, 1H), 1.28 – 1.16 (m, 1H), 1.10 (td, *J* = 8.1, 4.2 Hz, 1H), 0.92 – 0.79 (m, 1H), 0.66 (t, *J* = 7.4 Hz, 3H), 0.60 (d, *J* = 6.8 Hz, 3H). <sup>13</sup>C NMR (101 MHz, DMSO-*d*<sub>6</sub>) δ 173.7, 168.9, 159.0, 129.9, 127.4, 125.8, 119.7, 110.1, 57.1, 55.5, 36.7, 24.4, 22.7, 20.2, 15.6, 11.4, 9.1. HRMS (ESI<sup>+</sup>) *m/z* calcd. C<sub>17</sub>H<sub>24</sub>N<sub>2</sub>NaO<sub>3</sub><sup>+</sup> [M+Na]<sup>+</sup>: 327.1679, found: 327.1687.

***cis-N-((2S, 3R)-1-amino-3-methyl-1-oxopentan-2-yl)-2-(2-chlorophenyl)cyclopropanecarboxamide (3x)***

Substrate (0.2 mmol), aryl iodide (3.0 equiv), Pd(OAc)<sub>2</sub> (0.1 equiv), K<sub>2</sub>CO<sub>3</sub> (2.5 equiv) in *tert*-Amyl alcohol (0.4 mL), 100 °C, 24 h. Yield 67% (d.r. = 5.7:1) The diastereomeric ratio was determined by HPLC analysis on C18 column (TFA:MeCN:H<sub>2</sub>O = 0.1:25:75, flow rate 0.5 mL/min, λ = 254 nm, τ<sub>minor</sub> = 11.3 min, τ<sub>major</sub> = 19.0 min.)

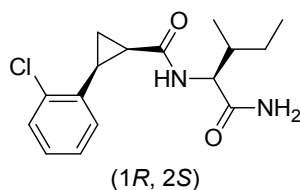

Yield 57% (35.4 mg). mp 149-151 °C. White solid. <sup>1</sup>H NMR (400 MHz, DMSO-*d*<sub>6</sub>) δ 7.88 (d, *J* = 8.9 Hz, 1H), 7.33 – 7.19 (m, 3H), 7.21 – 7.10 (m, 2H), 6.91 (s, 1H), 3.86 (dd, *J* = 8.9, 7.5 Hz, 1H), 2.42 – 2.27 (m, 2H), 1.61 – 1.51 (m, 2H), 1.34 – 1.17 (m, 2H), 1.02 – 0.91 (m, 1H), 0.73 – 0.58 (m, 6H). <sup>13</sup>C NMR (101 MHz, DMSO-*d*<sub>6</sub>) δ 173.7, 168.7, 135.8, 135.4, 131.4, 128.6, 127.9, 126.4, 57.0, 36.6, 24.5, 23.4, 22.7, 15.7, 11.2, 9.9. HRMS (ESI<sup>+</sup>) *m/z* calcd C<sub>16</sub>H<sub>21</sub>ClN<sub>2</sub>NaO<sub>2</sub><sup>+</sup> [M+Na]<sup>+</sup>: 331.1184, found: 331.1189.

***cis-N-((2S, 3R)-1-amino-3-methyl-1-oxopentan-2-yl)-2-(2-fluorophenyl)cyclopropanecarboxamide (3y)***

Substrate (0.2 mmol), aryl iodide (3.0 equiv), Pd(OAc)<sub>2</sub> (0.1 equiv), K<sub>2</sub>CO<sub>3</sub> (2.5 equiv) in *tert*-Amyl alcohol (0.4 mL), 100 °C, 24 h. Yield 68% (d.r. = 8.9:1). The diastereomeric ratio was determined by HPLC analysis on C18 column (TFA:MeCN:H<sub>2</sub>O = 0.1:25:75, flow rate 0.5 mL/min, λ = 254 nm, τ<sub>minor</sub> = 16.4 min, τ<sub>major</sub> = 28.7 min.)

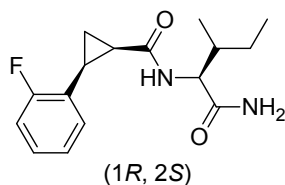

Yield 62% (35.7 mg). mp 179-181 °C. White solid. <sup>1</sup>H NMR (400 MHz, DMSO-*d*<sub>6</sub>) δ 7.92 (d, *J* = 9.0 Hz, 1H), 7.25 (s, 1H), 7.21 – 7.11 (m, 2H), 7.04 – 6.96 (m, 2H), 6.92 (s, 1H), 3.88 (dd, *J* = 9.0, 7.5 Hz, 1H), 2.38 – 2.21 (m, 2H), 1.60 – 1.53 (m, 1H), 1.48 (ddd, *J* = 7.3, 5.7, 4.3 Hz, 1H), 1.29 – 1.16 (m, 2H), 0.99 – 0.88 (m, 1H), 0.71 – 0.61 (m, 6H). <sup>13</sup>C NMR (101 MHz, DMSO-*d*<sub>6</sub>) δ 173.7, 168.7, 162.4 (d, *J* = 244 Hz), 131.4 (d, *J* = 4 Hz),



128.1 (d,  $J = 8$  Hz), 125.2 (d,  $J = 15$  Hz), 123.6 (d,  $J = 3$  Hz), 114.6 (d,  $J = 22$  Hz), 57.0, 36.5, 24.4, 22.3, 18.5 (d,  $J = 4$  Hz), 15.6, 11.2, 9.2. HRMS (ESI<sup>+</sup>)  $m/z$  calcd. C<sub>16</sub>H<sub>21</sub>FN<sub>2</sub>NaO<sub>2</sub><sup>+</sup> [M+Na]<sup>+</sup>: 315.1479, found: 315.1478.

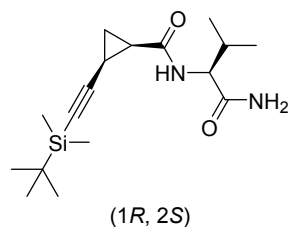

***cis*-N-((*S*)-1-amino-3-methyl-1-oxobutan-2-yl)-2-((*tert*-butyldimethylsilyl)ethynyl)cyclopropane-1-carboxamide (3z)**

Substrate (0.1 mmol), (bromoethynyl)(*tert*-butyl)dimethylsilane (5.0equiv), Pd(OAc)<sub>2</sub> (0.1 equiv), K<sub>2</sub>CO<sub>3</sub> (2.0 equiv) in *tert*-Amyl alcohol (0.2 mL), 100 °C, 24 h. Yield 55. Colorless oil. <sup>1</sup>H NMR (400 MHz, DMSO-*d*<sub>6</sub>)  $\delta$  7.97 (d,  $J = 9.2$  Hz, 1H), 7.42 (s, 1H), 7.00 (s, 1H), 4.22 (dd,  $J = 9.2, 6.3$  Hz, 1H), 2.14 – 2.09 (m, 1H), 1.94 (dd,  $J = 13.3, 6.7$  Hz, 1H), 1.78 – 1.72 (m, 1H), 1.18 (m, 1H), 1.08 – 1.02 (m, 1H), 0.87 – 0.83 (m, 15H), -0.02 (m, 6H). <sup>13</sup>C NMR (101 MHz, DMSO-*d*<sub>6</sub>) 173.1, 167.4, 106.4, 80.3, 57.3, 30.4, 25.9, 22.2, 19.4, 18.0, 16.2, 12.5, 8.7, -4.5, -4.5. HRMS (ESI<sup>+</sup>)  $m/z$  calcd. C<sub>17</sub>H<sub>30</sub>N<sub>2</sub>NaO<sub>2</sub>Si<sup>+</sup> [M+Na]<sup>+</sup>: 345.1969, found: 345.1980.

# *Appendix I*

**Spectral Copies of  $^1\text{H}$  and  $^{13}\text{C}$  NMR Data**

**Obtained in this Study**

**(1*R*, 2*S*)-*N*-((*S*)-3-methyl-1-(methylamino)-1-oxobutan-2-yl)-2-phenylcyclopropanecarboxamide**

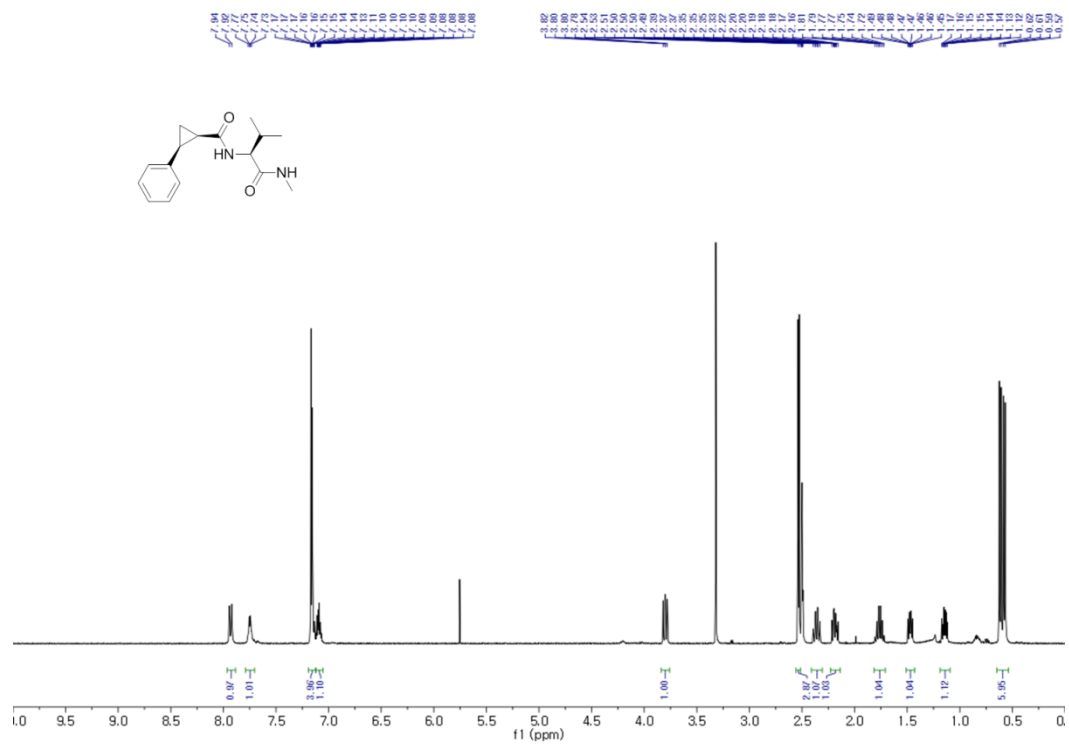

**400 MHz, <sup>1</sup>H NMR in DMSO-*d*<sub>6</sub>**



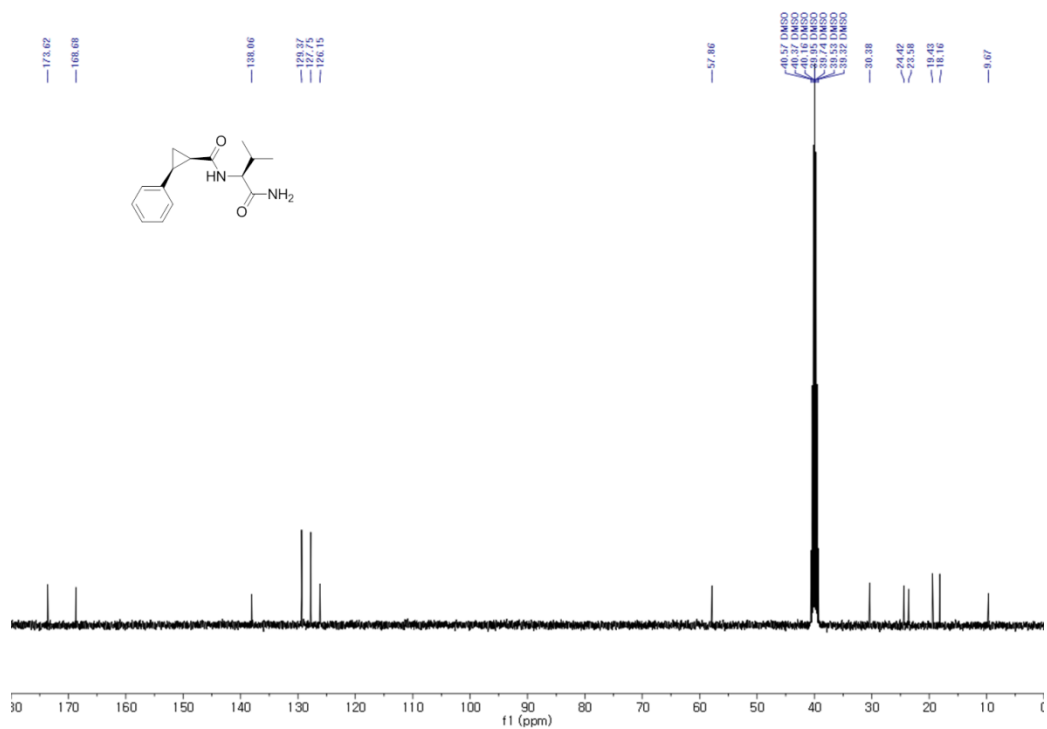

100 MHz, <sup>13</sup>C NMR in DMSO-*d*<sub>6</sub>

(1S, 2R)-N-((S)-1-amino-3-methyl-1-oxobutan-2-yl)-2-phenylcyclopropanecarboxamide (2b)

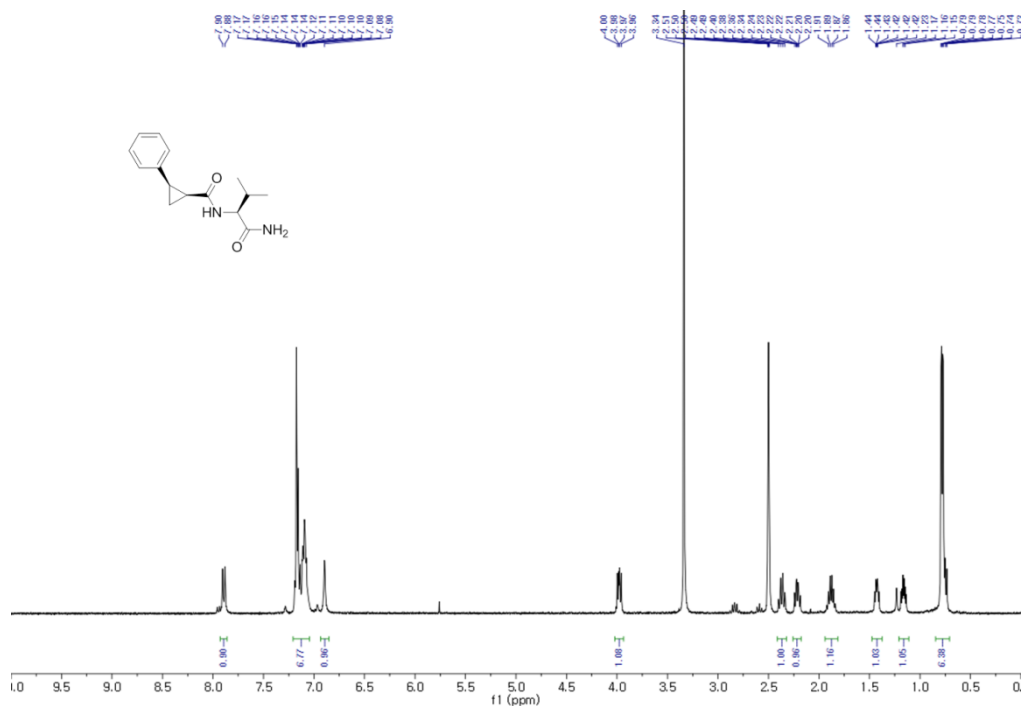

400 MHz, <sup>1</sup>H NMR in DMSO-*d*<sub>6</sub>





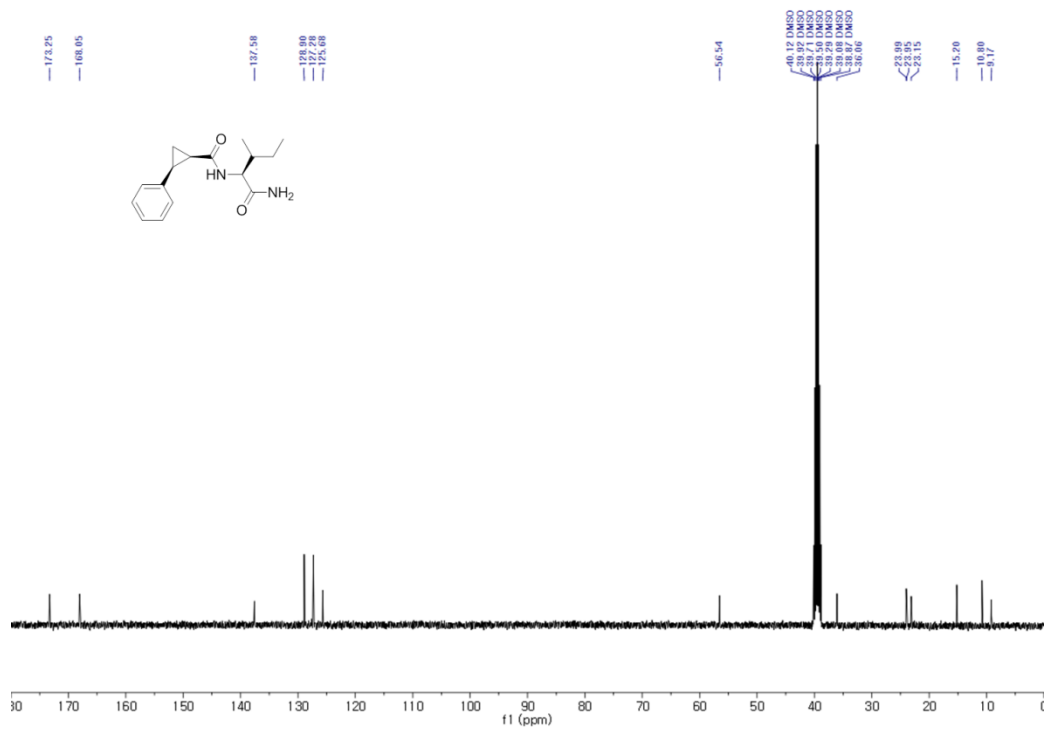

100 MHz,  $^{13}\text{C}$  NMR in  $\text{DMSO-}d_6$

(1R,2S)-N-((S)-1-amino-3,3-dimethyl-1-oxobutan-2-yl)-2-phenylcyclopropanecarboxamide (3b)

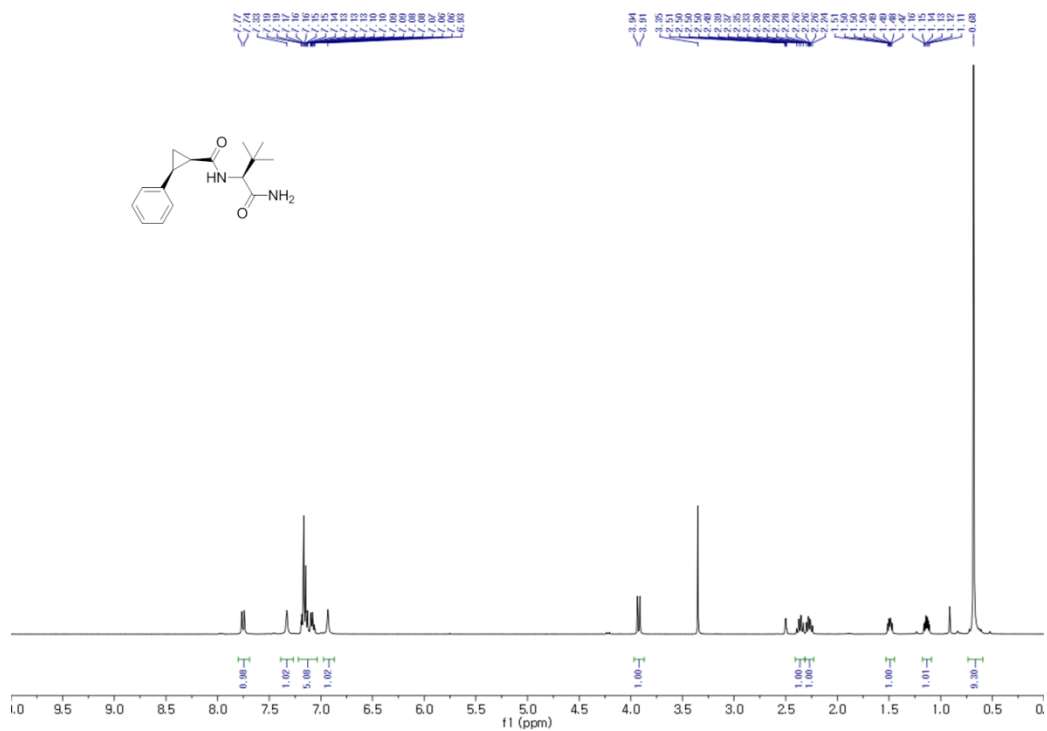

400 MHz,  $^1\text{H}$  NMR in  $\text{DMSO-}d_6$



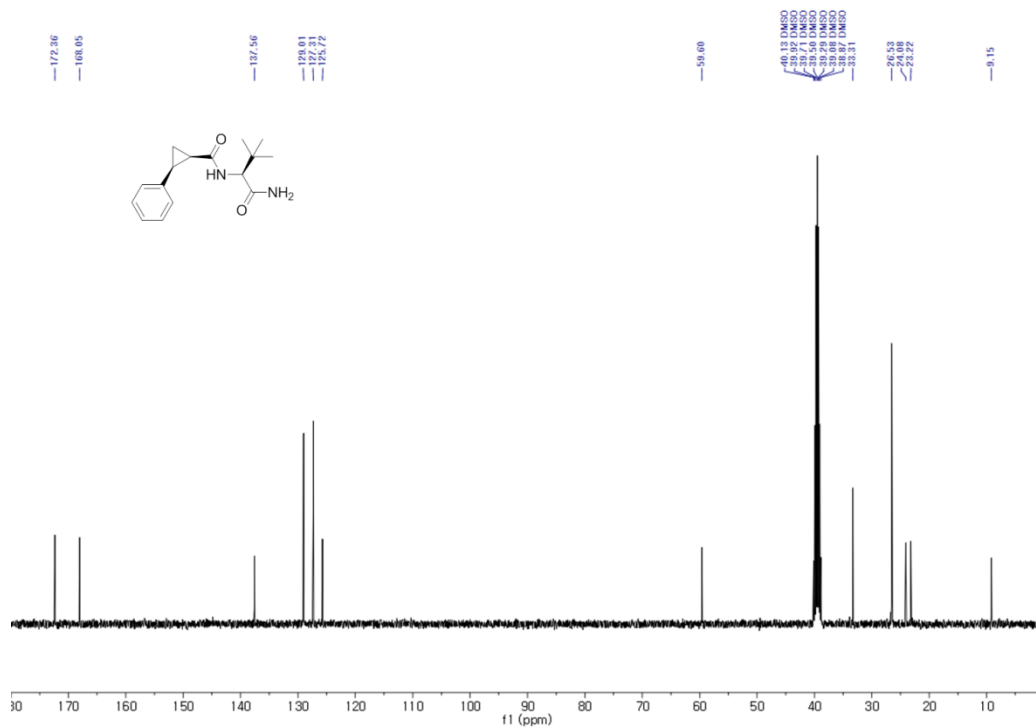

100 MHz,  $^{13}\text{C}$  NMR in  $\text{DMSO}-d_6$

(1*R*, 2*S*)-*N*-((2*S*, 3*S*)-1-amino-3-(benzyloxy)-1-oxobutan-2-yl)-2-phenylcyclopropanecarboxamide (3c)

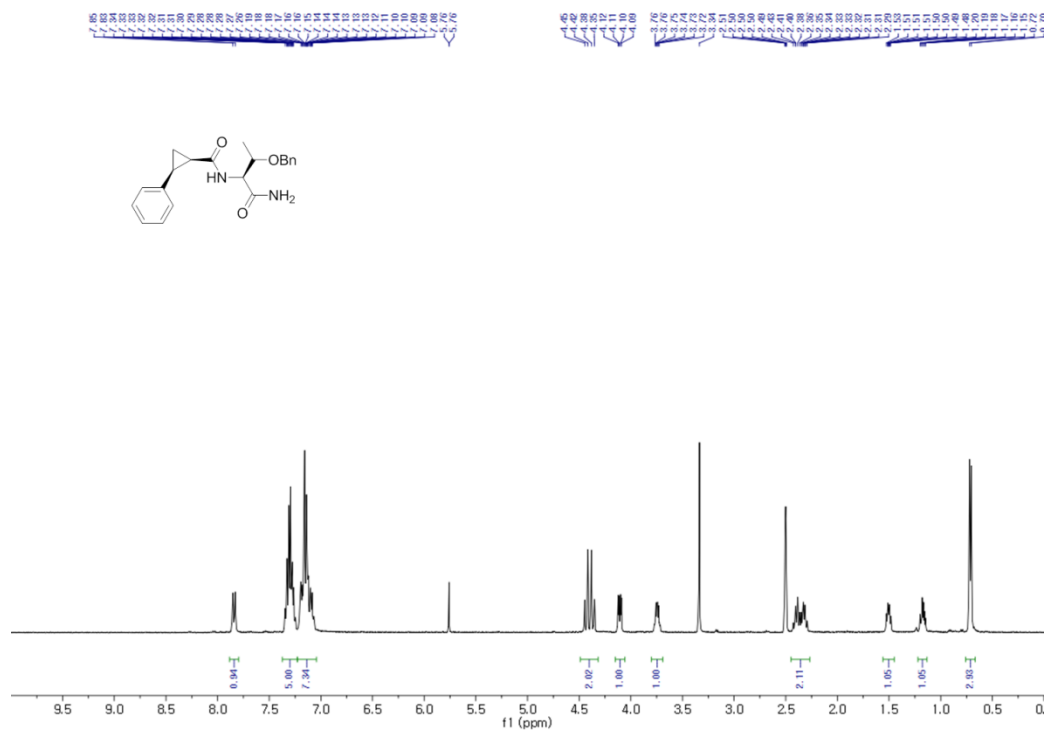

400 MHz,  $^1\text{H}$  NMR in  $\text{DMSO}-d_6$

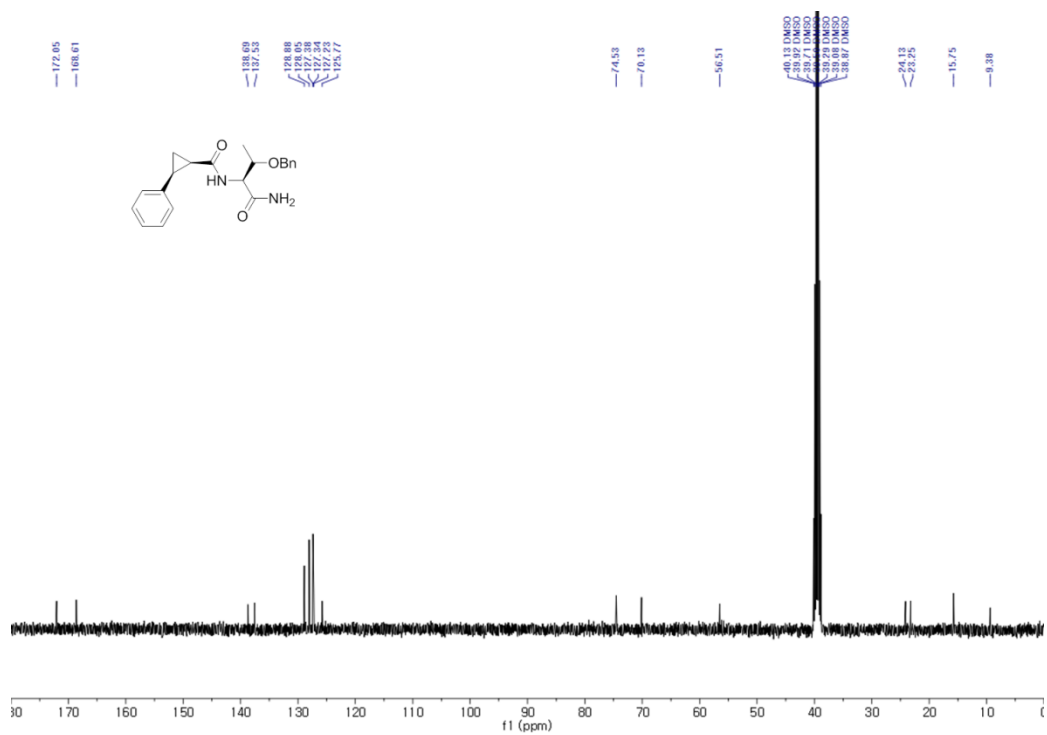

100 MHz, <sup>13</sup>C NMR in DMSO-*d*<sub>6</sub>

(1R,2S)-N-((S)-2-amino-2-oxo-1-phenylethyl)-2-phenylcyclopropanecarboxamide (3d)

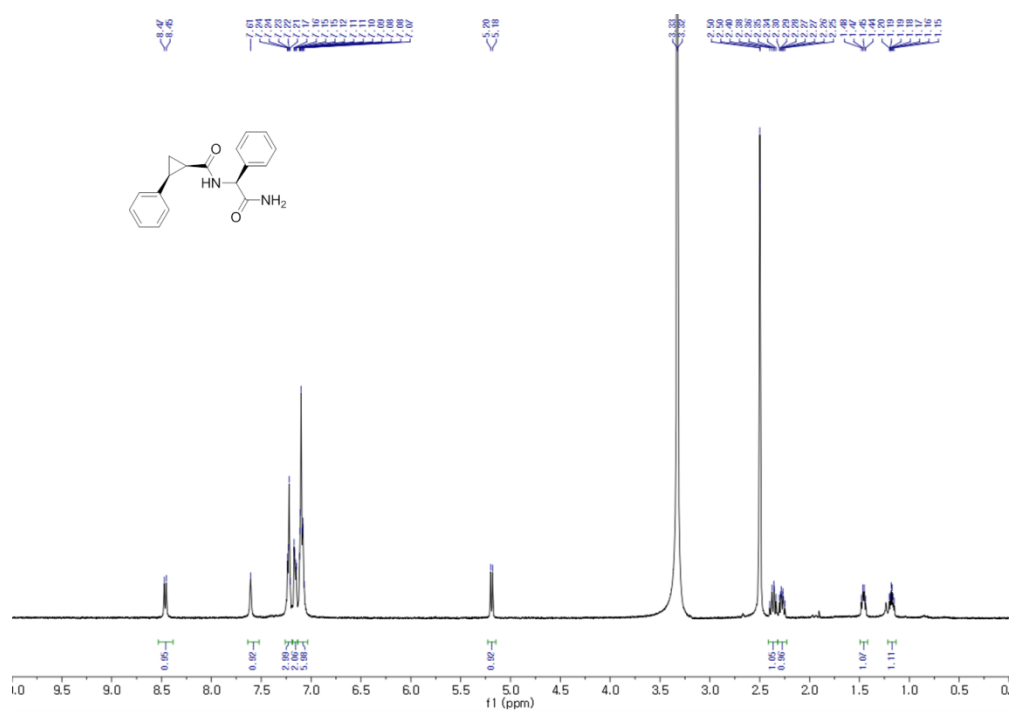

400 MHz, <sup>1</sup>H NMR in DMSO-*d*<sub>6</sub>



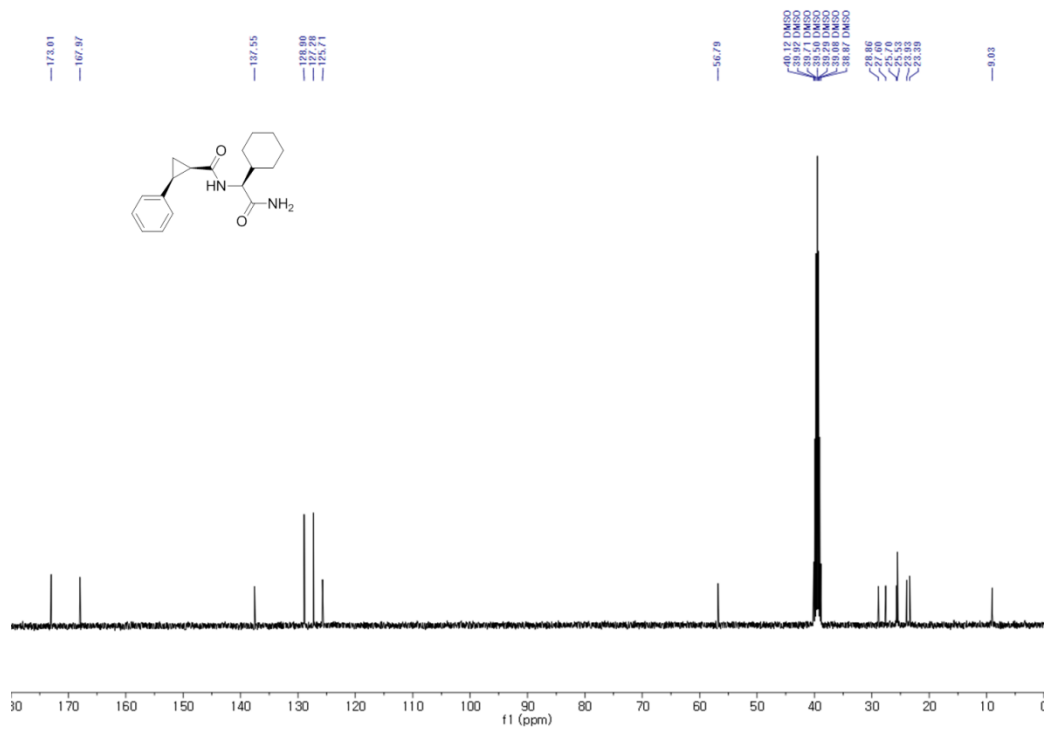

100 MHz,  $^{13}\text{C}$  NMR in  $\text{DMSO-}d_6$

(1R,2S)-N-((S)-1-amino-1-oxo-3-phenylpropan-2-yl)-2-phenylcyclopropanecarboxamide (3f)

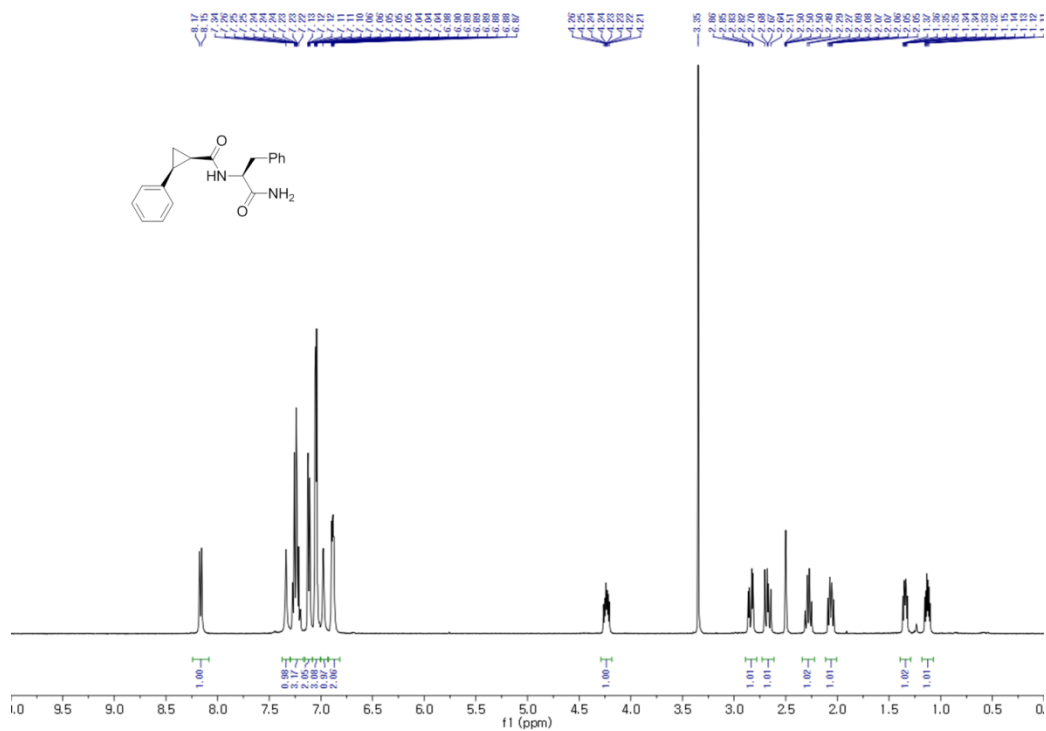

400 MHz,  $^1\text{H}$  NMR in  $\text{DMSO-}d_6$

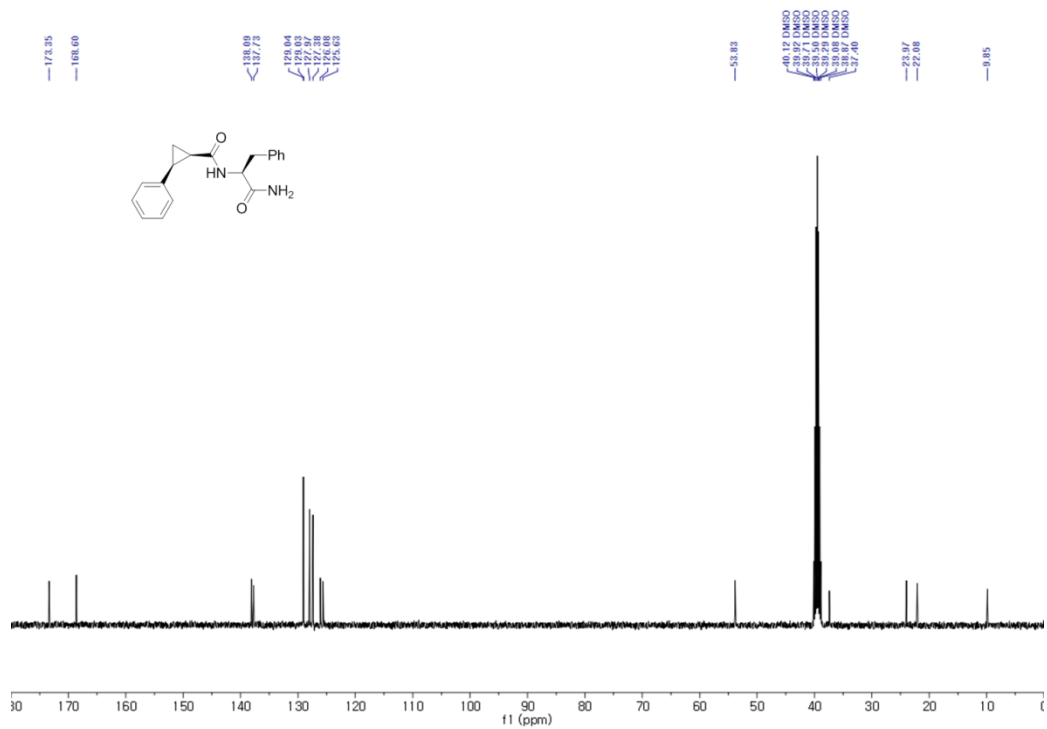

100 MHz,  $^{13}\text{C}$  NMR in  $\text{DMSO}-d_6$

(1*R*, 2*S*)-*N*-((*S*)-1-amino-3-methyl-1-oxopentan-2-yl)-2-(*p*-tolyl)cyclopropanecarboxamide (3g)

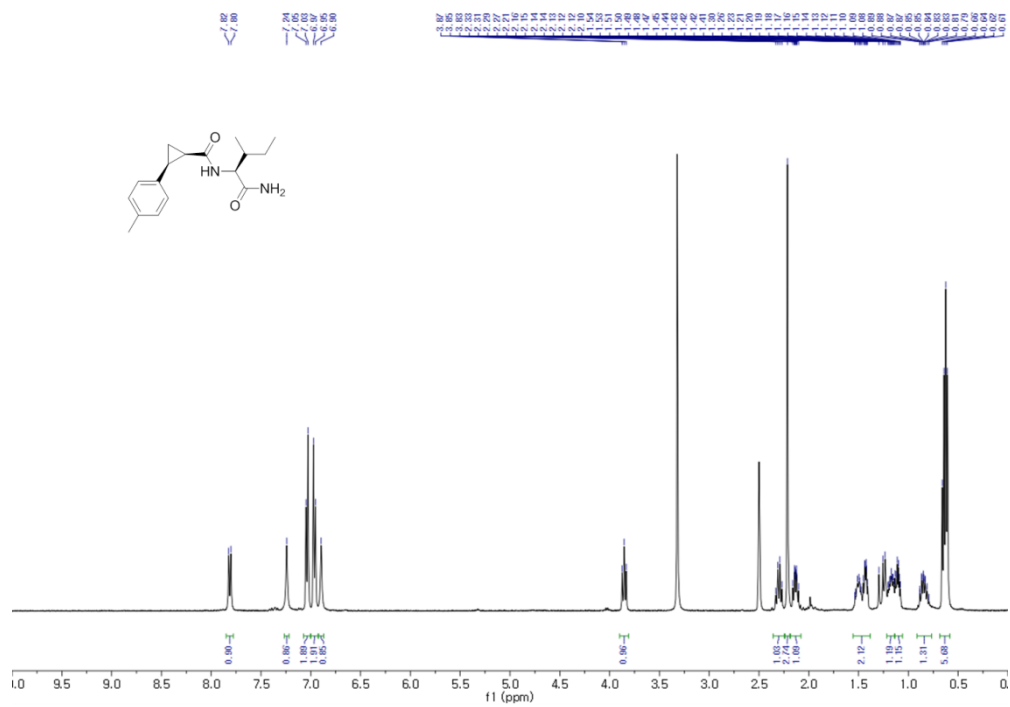

400 MHz,  $^1\text{H}$  NMR in  $\text{DMSO}-d_6$



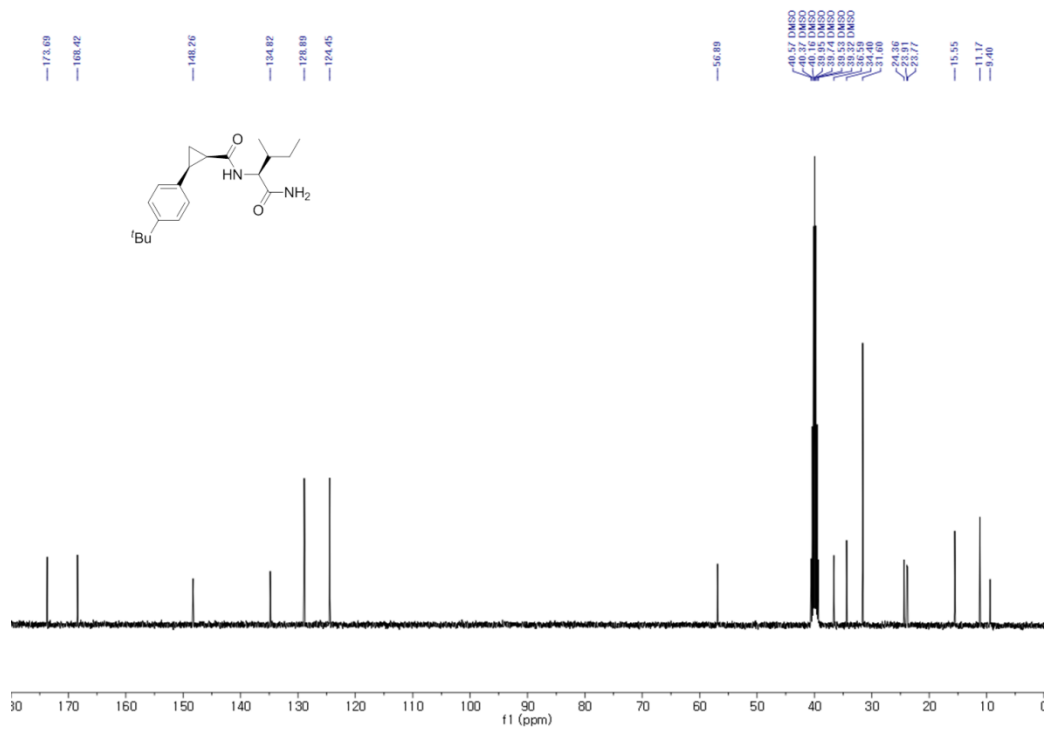

100 MHz,  $^{13}\text{C}$  NMR in  $\text{DMSO-}d_6$

(1*R*, 2*S*)-*N*-((*S*)-1-amino-3-methyl-1-oxopentan-2-yl)-2-((1,1'-biphenyl)-4-yl)cyclopropanecarboxamide (3i)

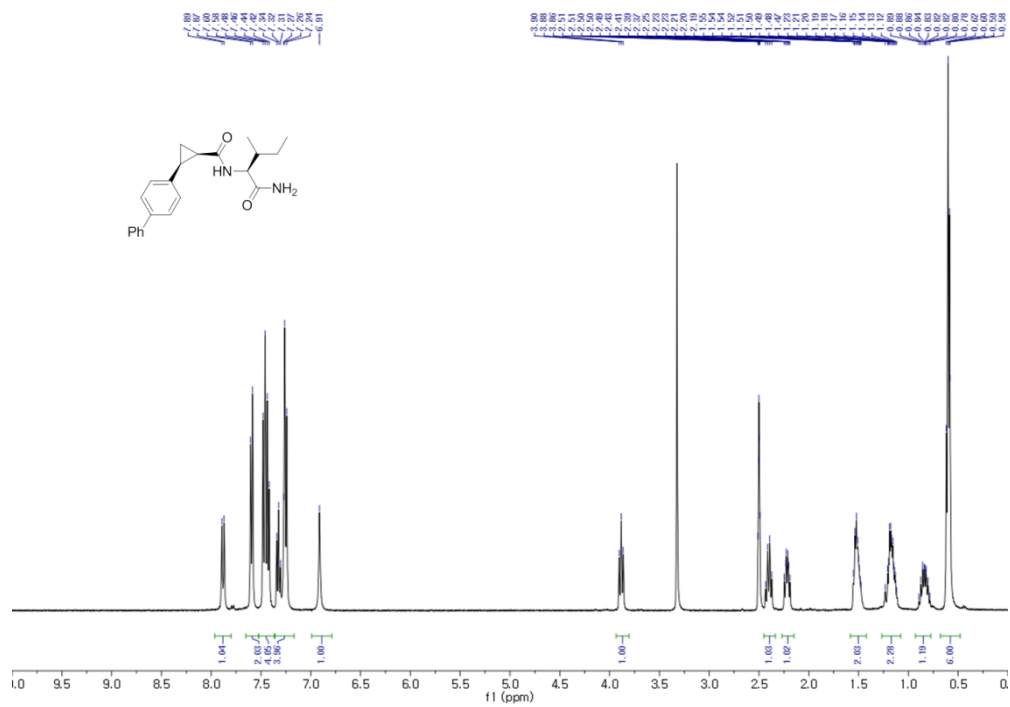

400 MHz,  $^1\text{H}$  NMR in  $\text{DMSO-}d_6$

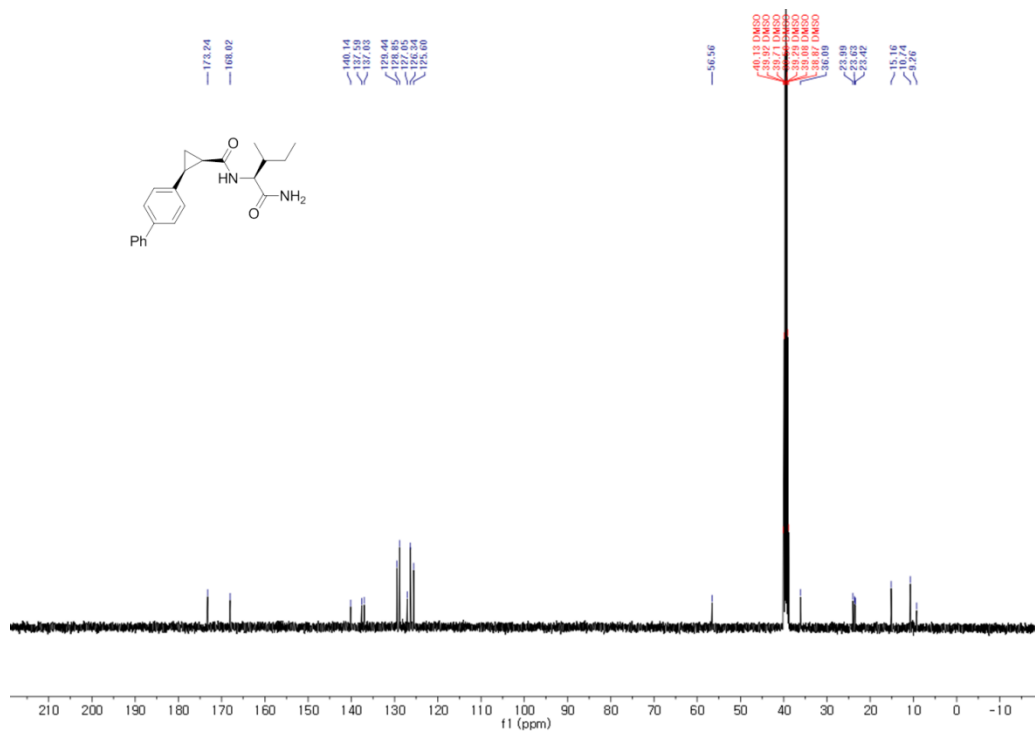

100 MHz, <sup>13</sup>C NMR in DMSO-*d*<sub>6</sub>

(1*R*, 2*S*)-*N*-((*S*)-1-amino-3-methyl-1-oxopent-2-yl)-2-(4-methoxyphenyl)cyclopropanecarboxamide (3j)

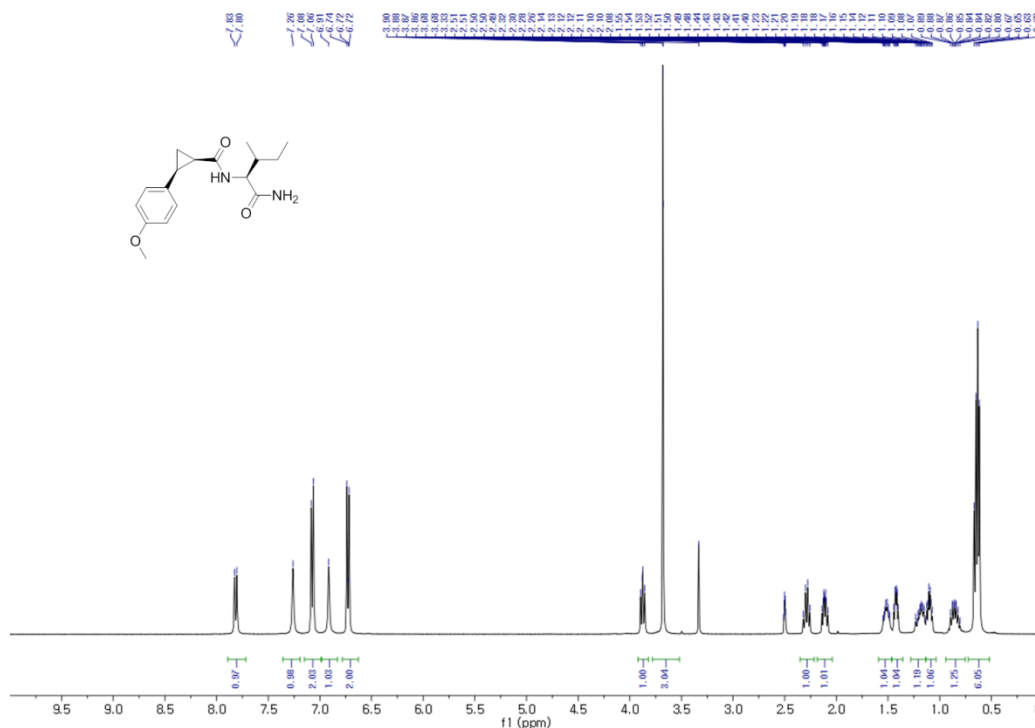

400 MHz, <sup>1</sup>H NMR in DMSO-*d*<sub>6</sub>





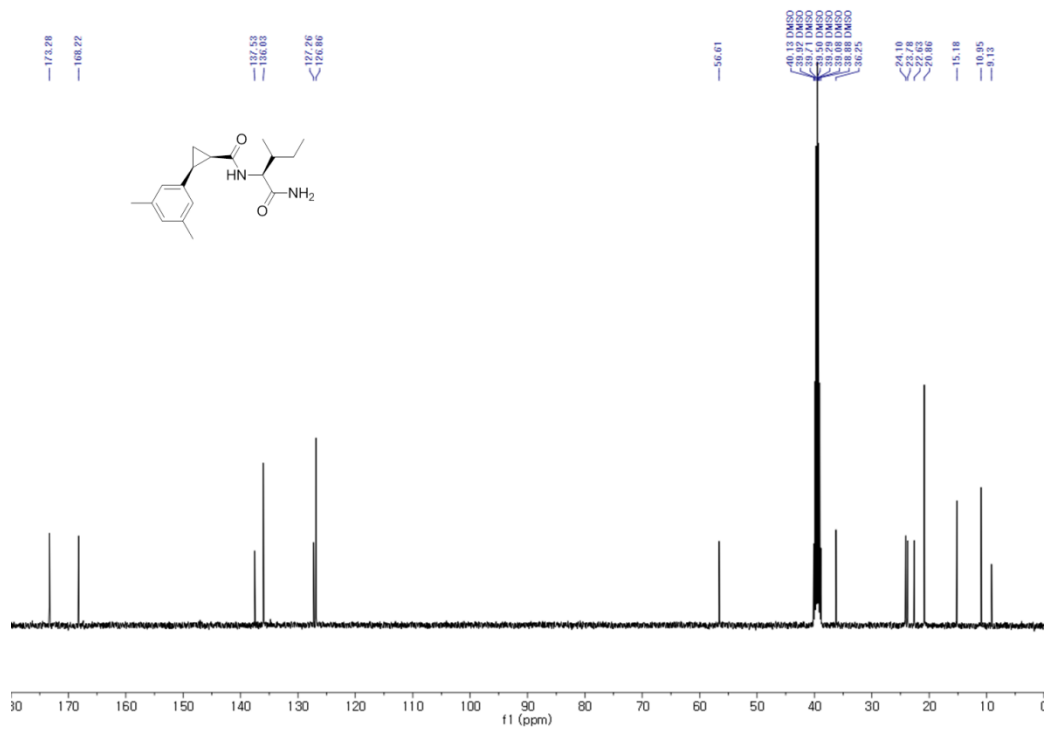

100 MHz, <sup>13</sup>C NMR in DMSO-*d*<sub>6</sub>

(1R, 2S)-N-((2S, 3R)-1-amino-3-methyl-1-oxopentan-2-yl)-2-(3,5-dichlorophenyl)cyclopropanecarboxamide (3I)

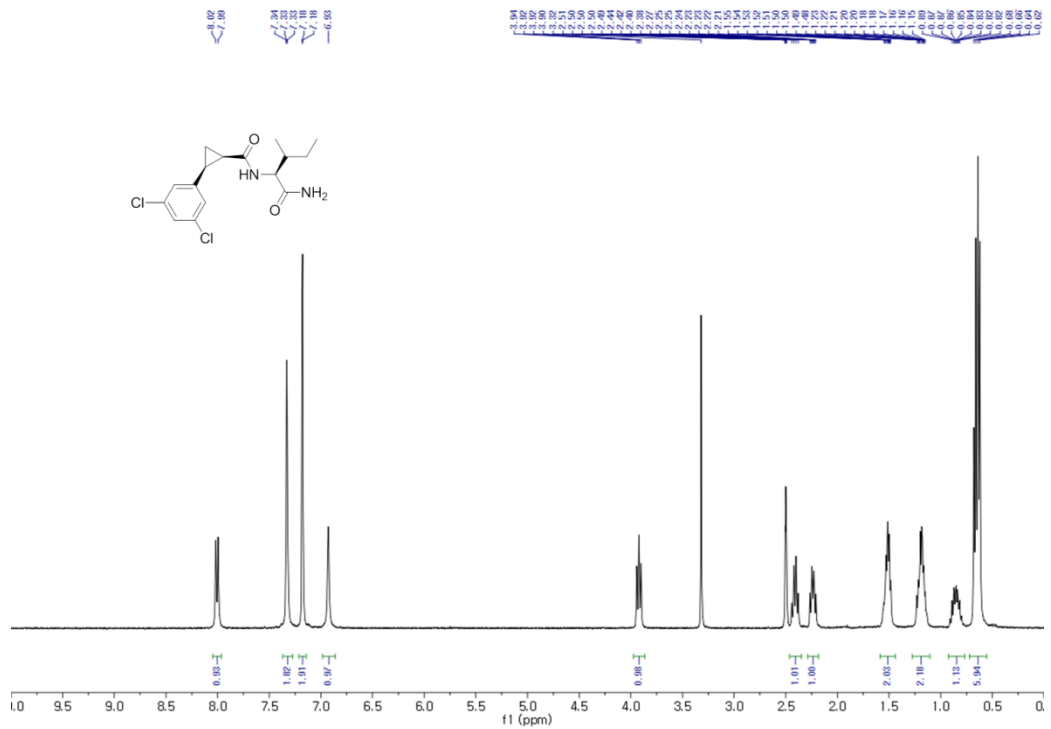

400 MHz, <sup>1</sup>H NMR in DMSO-*d*<sub>6</sub>

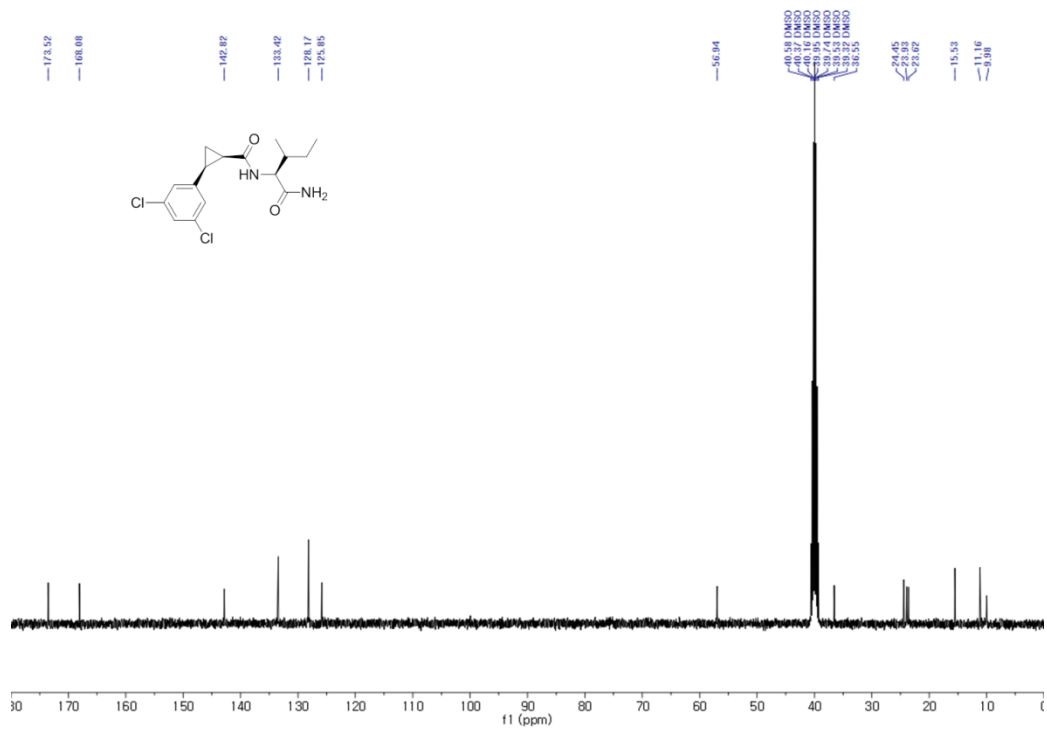

100 MHz,  $^{13}\text{C}$  NMR in  $\text{DMSO-}d_6$

(1*R*, 2*S*)-*N*-((2*S*, 3*R*)-1-amino-3-methyl-1-oxopentan-2-yl)-2-(3,5-di-*tert*-butylphenyl)cyclopropanecarboxamide (3m)

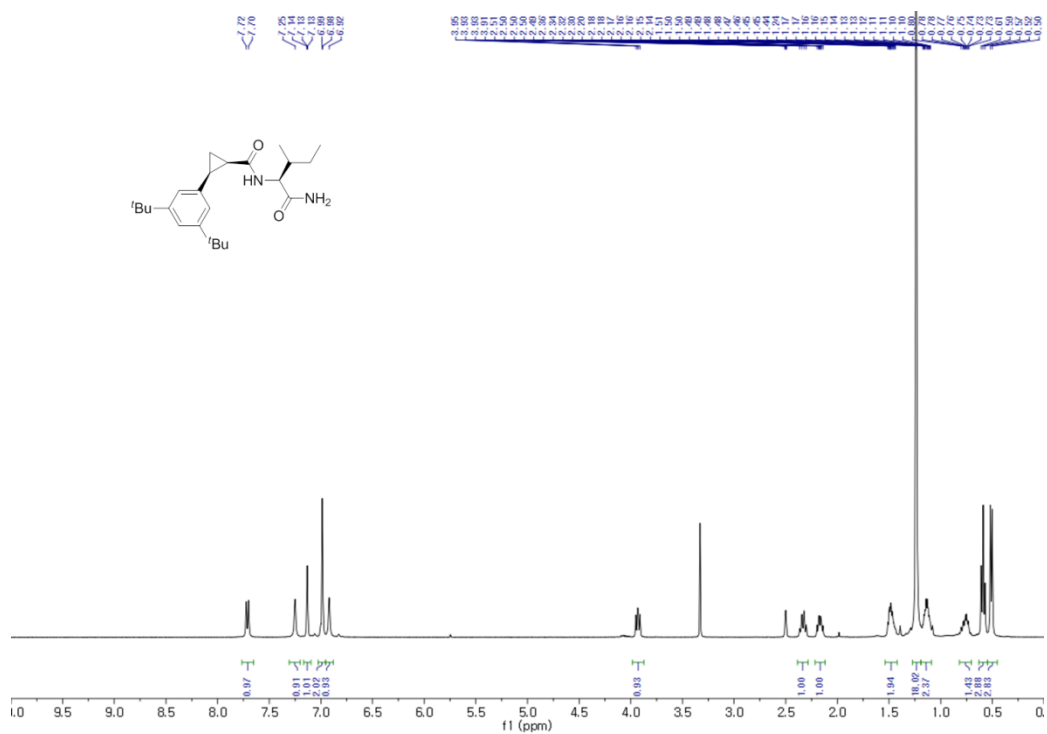

400 MHz,  $^1\text{H}$  NMR in  $\text{DMSO-}d_6$

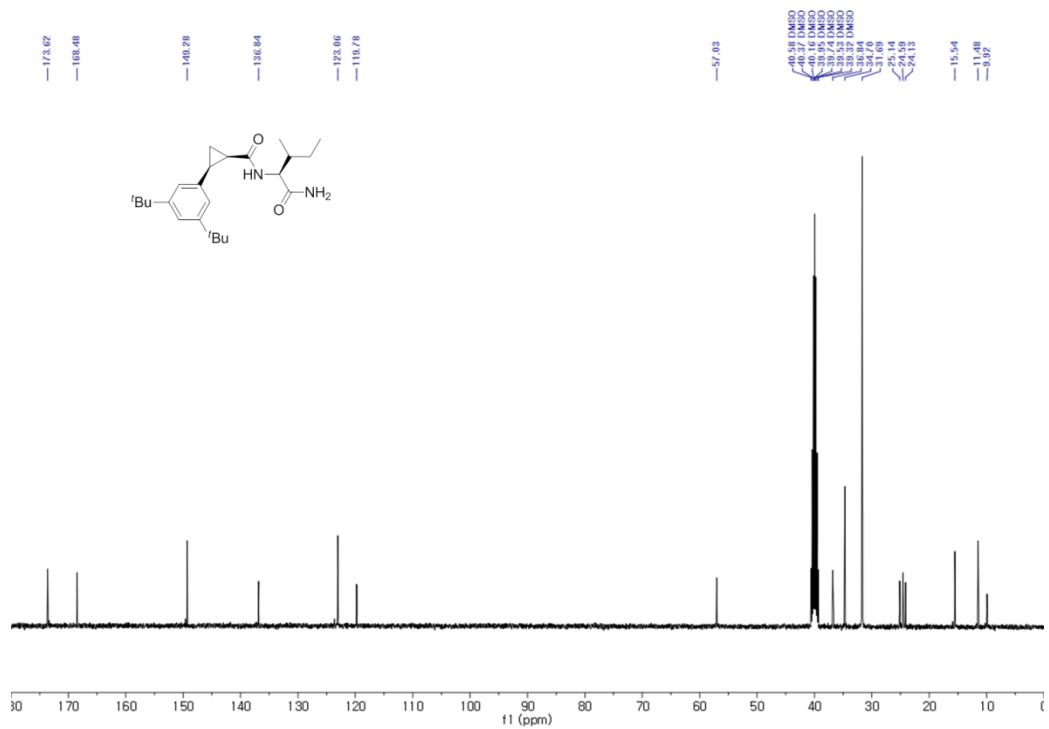

100 MHz,  $^{13}\text{C}$  NMR in  $\text{DMSO-}d_6$

(1*R*,2*S*)-*N*-((*S*)-1-amino-3-methyl-1-oxopentan-2-yl)-2-(4-bromophenyl)cyclopropanecarboxamide (3n)

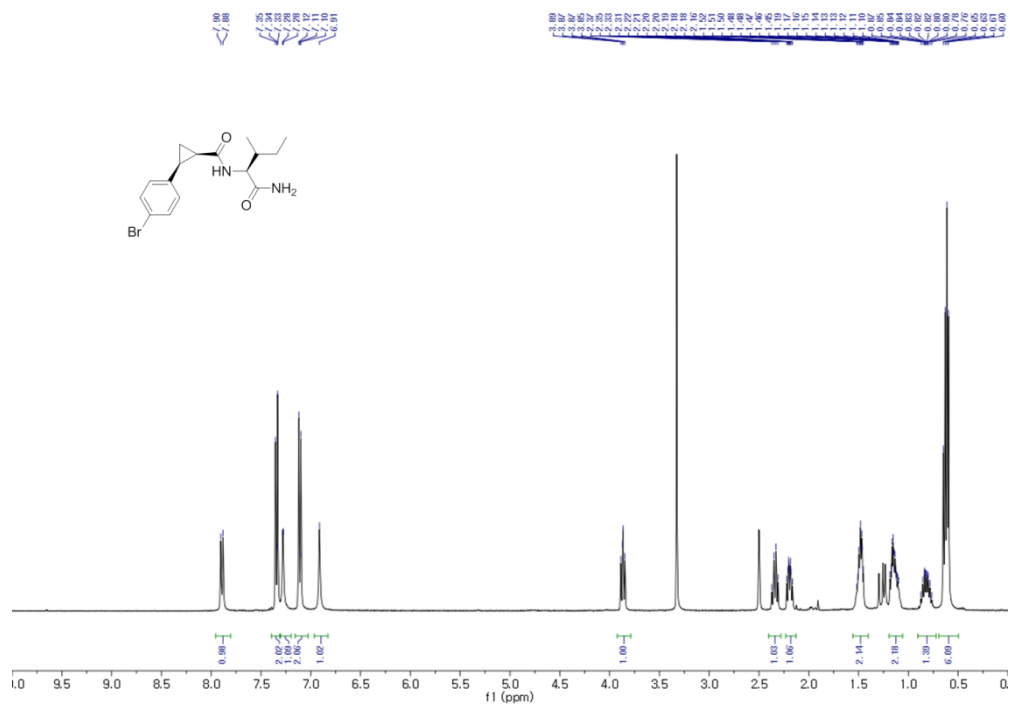

400 MHz,  $^1\text{H}$  NMR in  $\text{DMSO-}d_6$

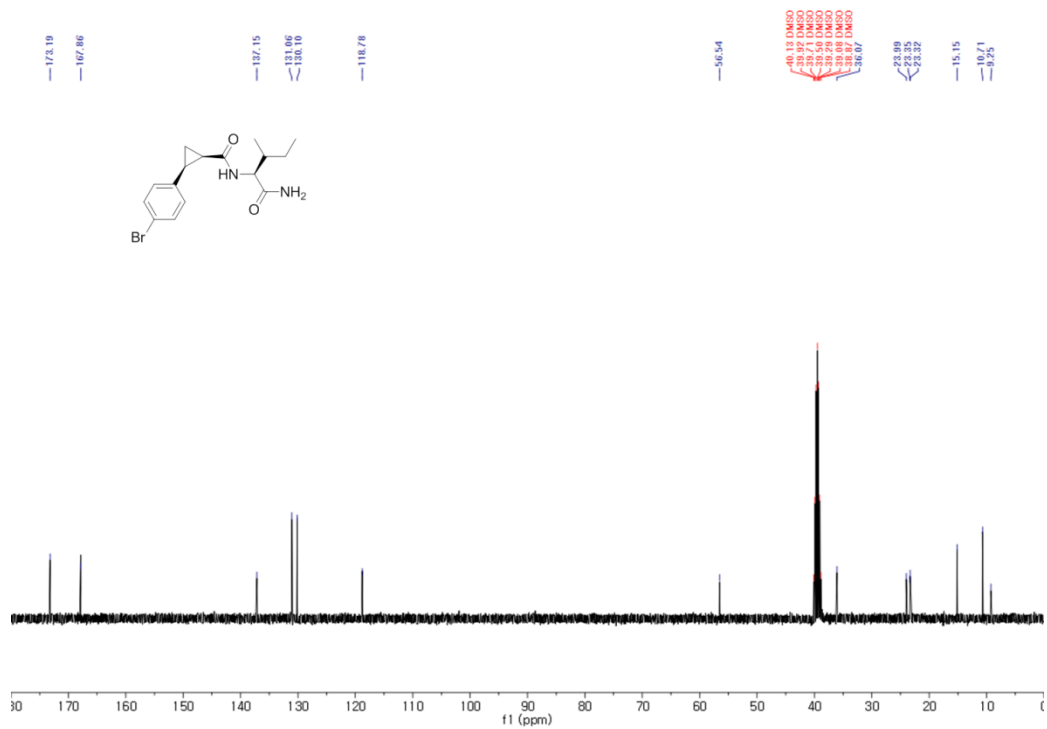

100 MHz,  $^{13}\text{C}$  NMR in  $\text{DMSO}-d_6$

(1R, 2S)-N-((2S, 3R)-1-amino-3-methyl-1-oxopentan-2-yl)-2-(4-chlorophenyl)cyclopropanecarboxamide  
(3o)

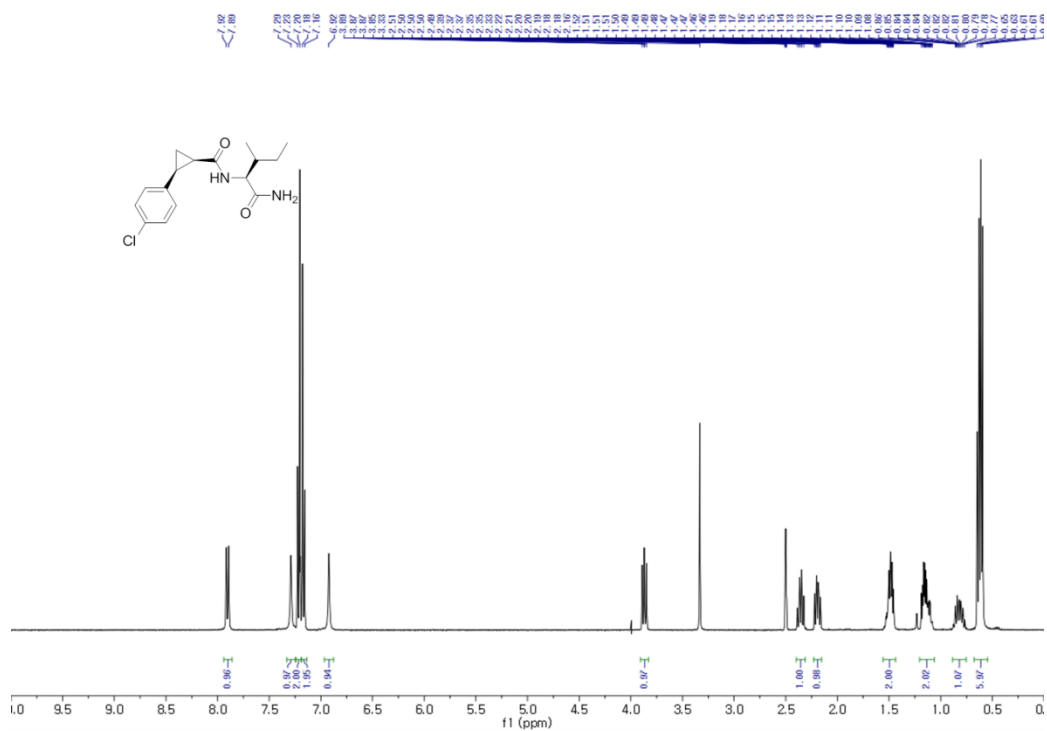

400 MHz,  $^1\text{H}$  NMR in  $\text{DMSO}-d_6$

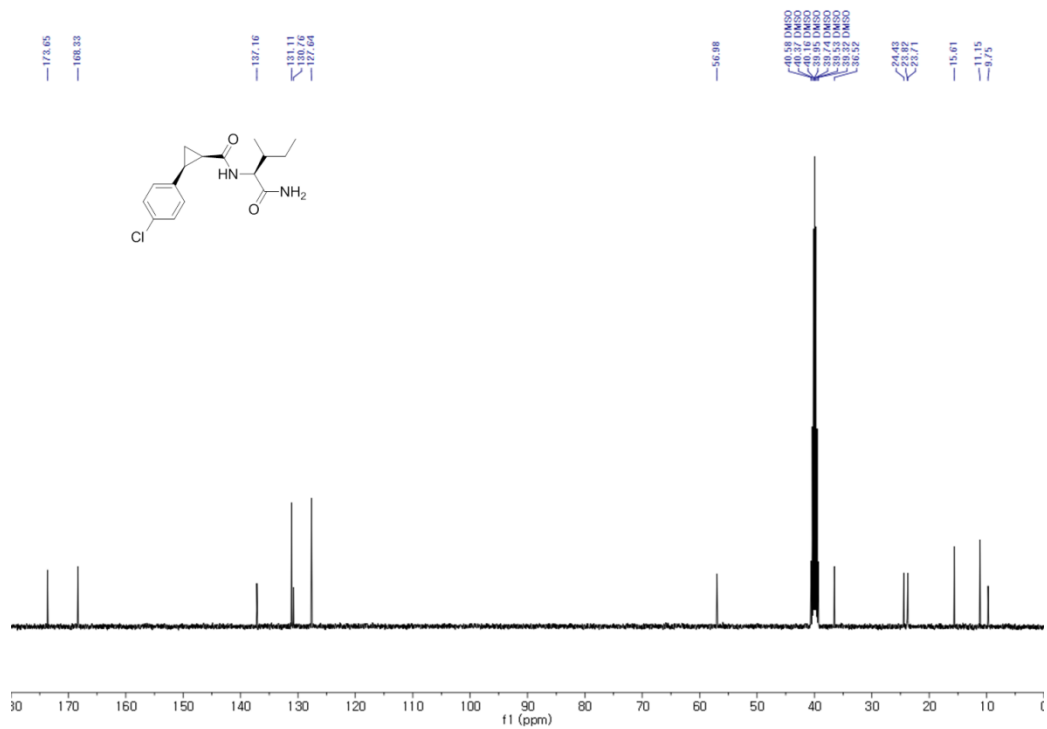

100 MHz,  $^{13}\text{C}$  NMR in  $\text{DMSO-}d_6$

(1*R*, 2*S*)-*N*-((2*S*, 3*R*)-1-amino-3-methyl-1-oxopentan-2-yl)-2-(4-fluorophenyl)cyclopropanecarboxamide (3p)

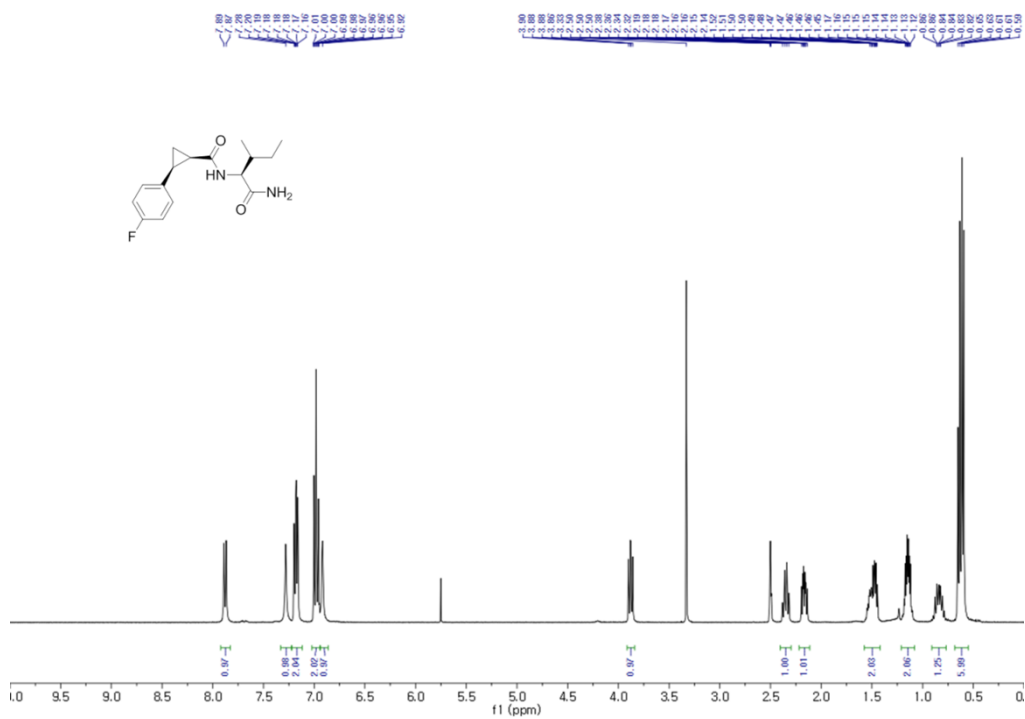

400 MHz, <sup>1</sup>H NMR in DMSO-d<sub>6</sub>

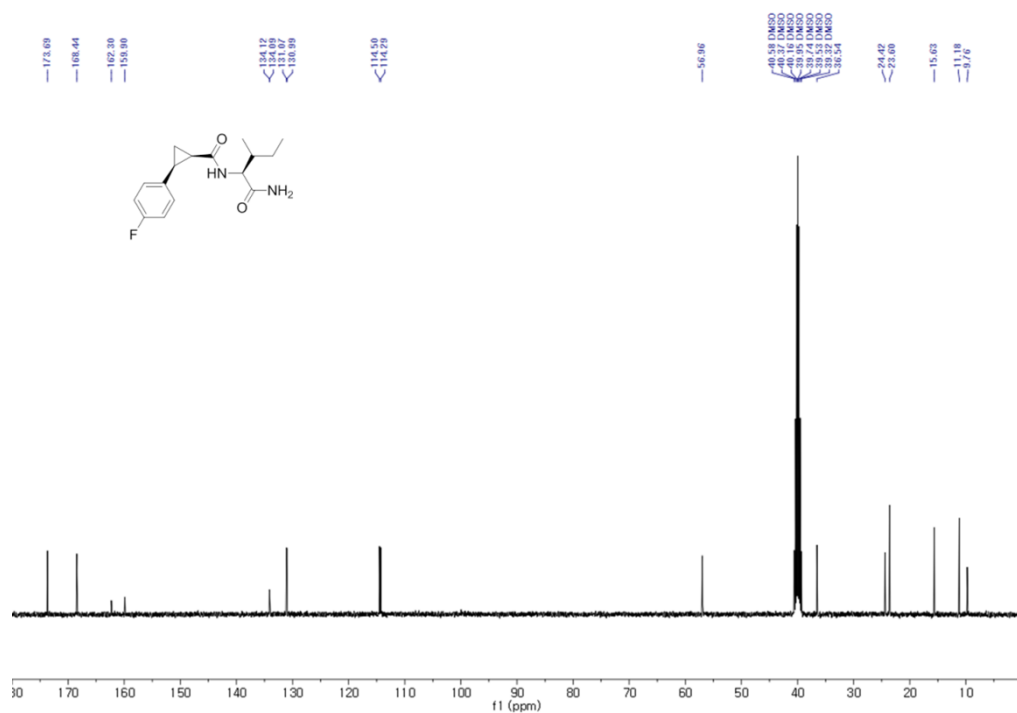

100 MHz, <sup>13</sup>C NMR in DMSO-d<sub>6</sub>

(1R, 2S)-N-((2S, 3R)-1-amino-3-methyl-1-oxopentan-2-yl)-2-(4-(trifluoromethyl)phenyl)cyclopropanecarboxamide (3q)

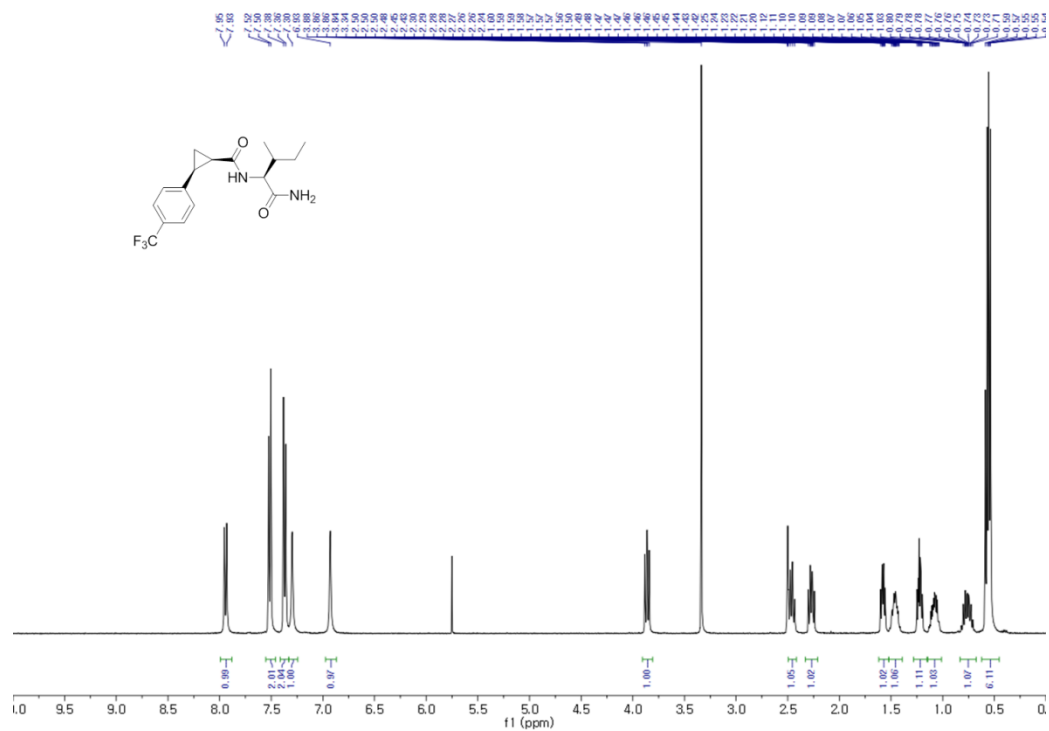

400 MHz, <sup>1</sup>H NMR in DMSO-d<sub>6</sub>

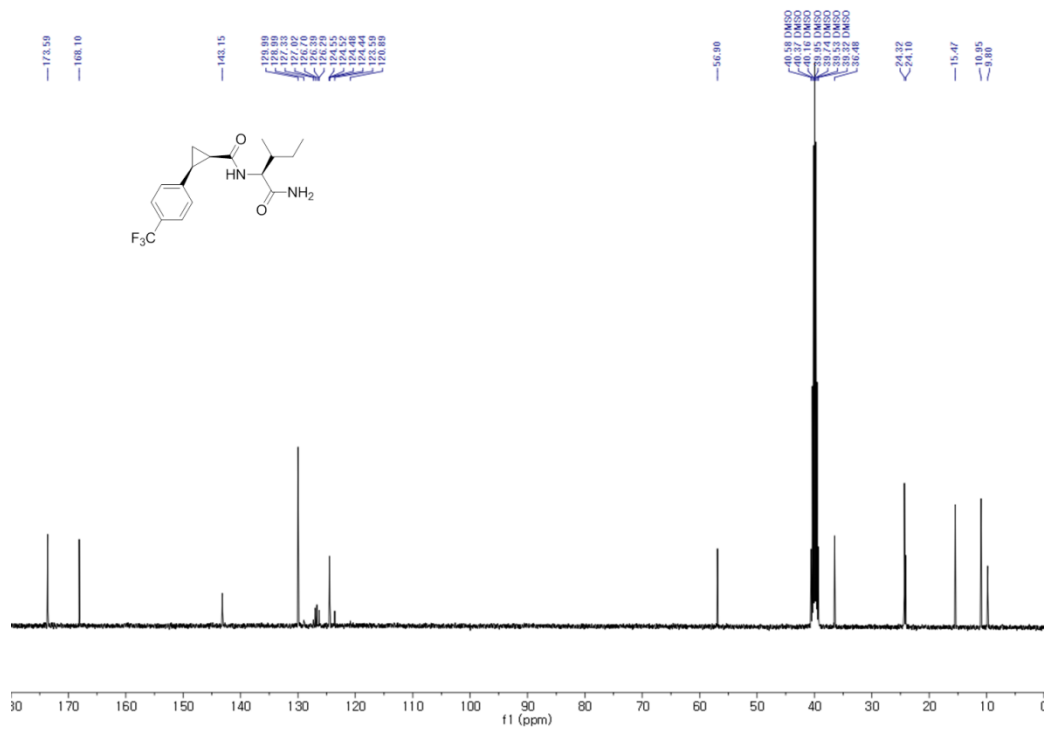

100 MHz,  $^{13}\text{C}$  NMR in  $\text{DMSO-}d_6$

methyl 4-((1S, 2R)-2-(((2S, 3R)-1-amino-3-methyl-1-oxopent-2-yl)carbamoyl)cyclopropyl)benzoate (3r)

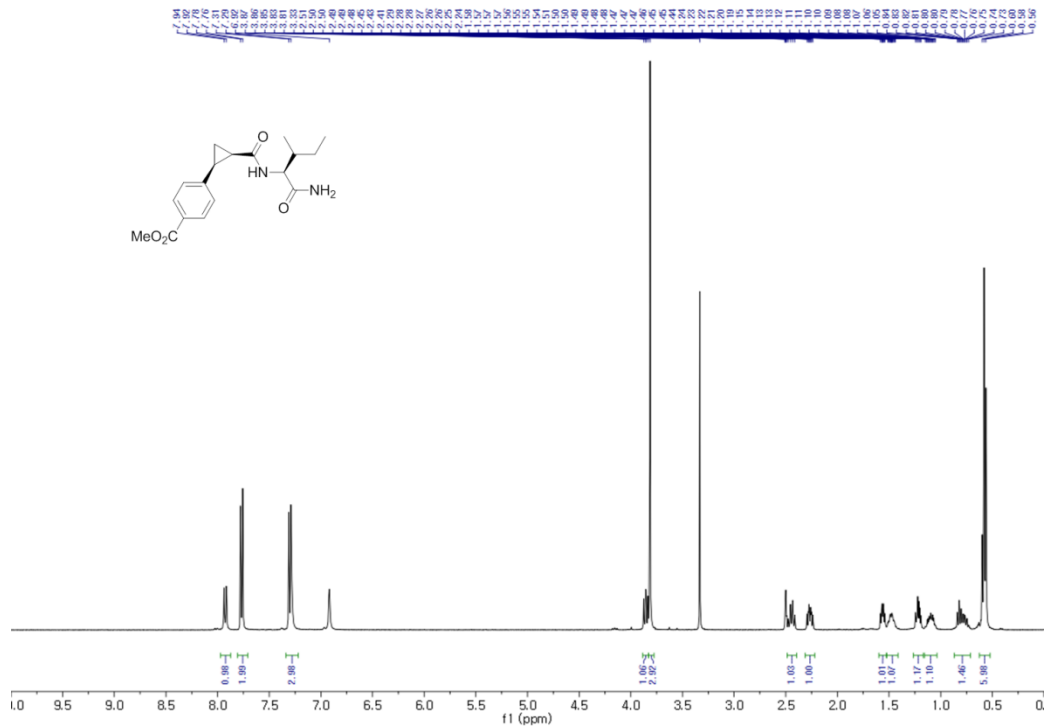

400 MHz,  $^1\text{H}$  NMR in  $\text{DMSO-}d_6$



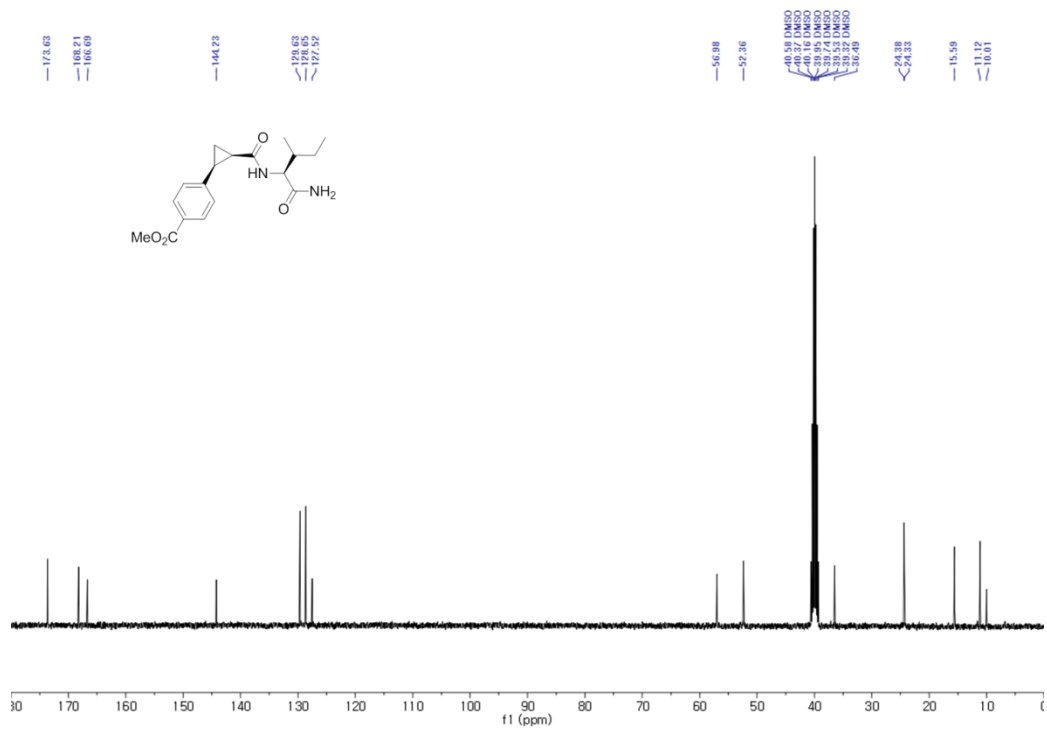

100 MHz,  $^{13}\text{C}$  NMR in  $\text{DMSO}-d_6$

*cis*-2-(4-acetylphenyl)-*N*-((2*S*, 3*R*)-1-amino-3-methyl-1-oxopentan-2-yl)cyclopropanecarboxamide (3s)

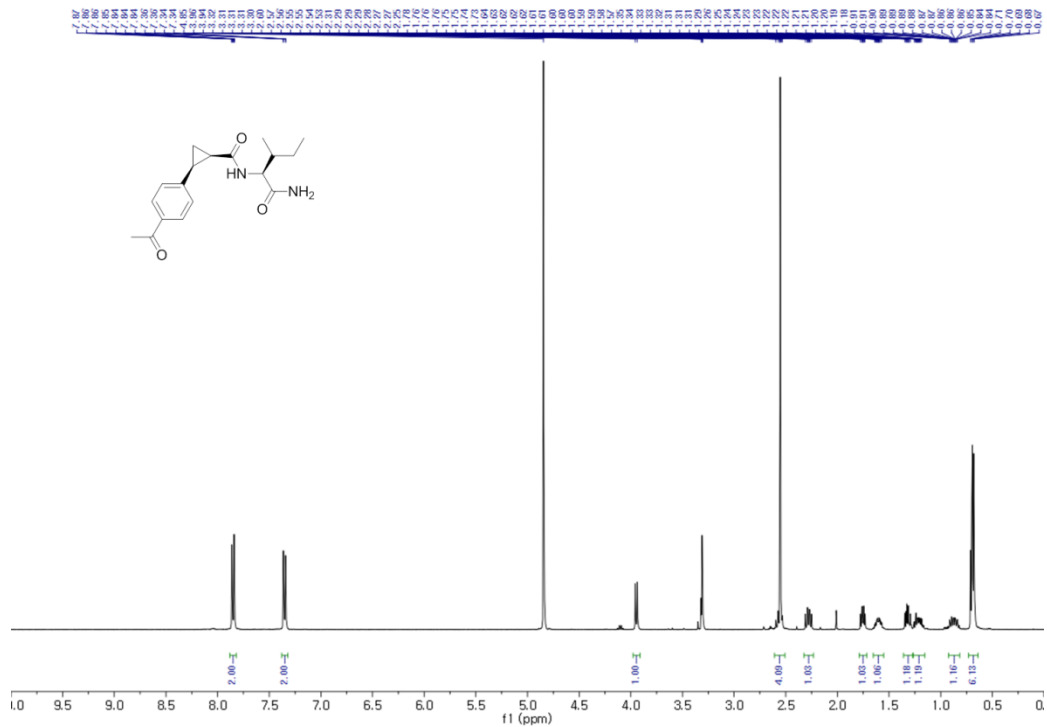

400 MHz,  $^1\text{H}$  NMR in  $\text{DMSO}-d_6$





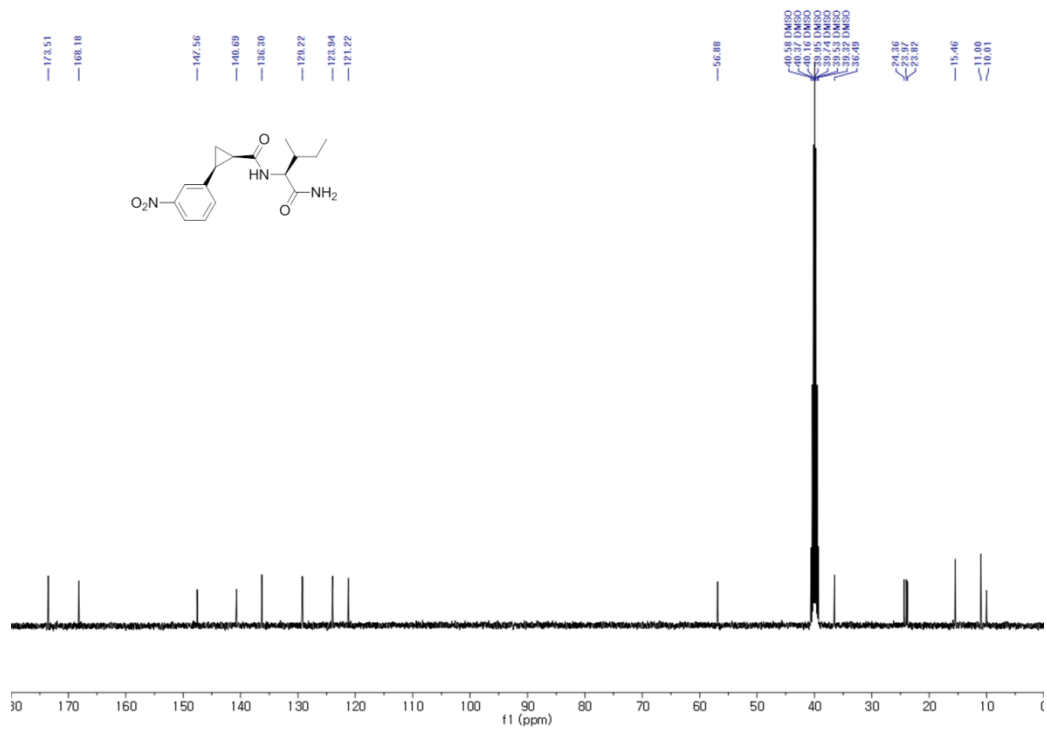

100 MHz, <sup>13</sup>C NMR in DMSO-*d*<sub>6</sub>

(1R, 2S)-N-((2S, 3R)-1-amino-3-methyl-1-oxopentan-2-yl)-2-(4-nitrophenyl)cyclopropanecarboxamide (3v)

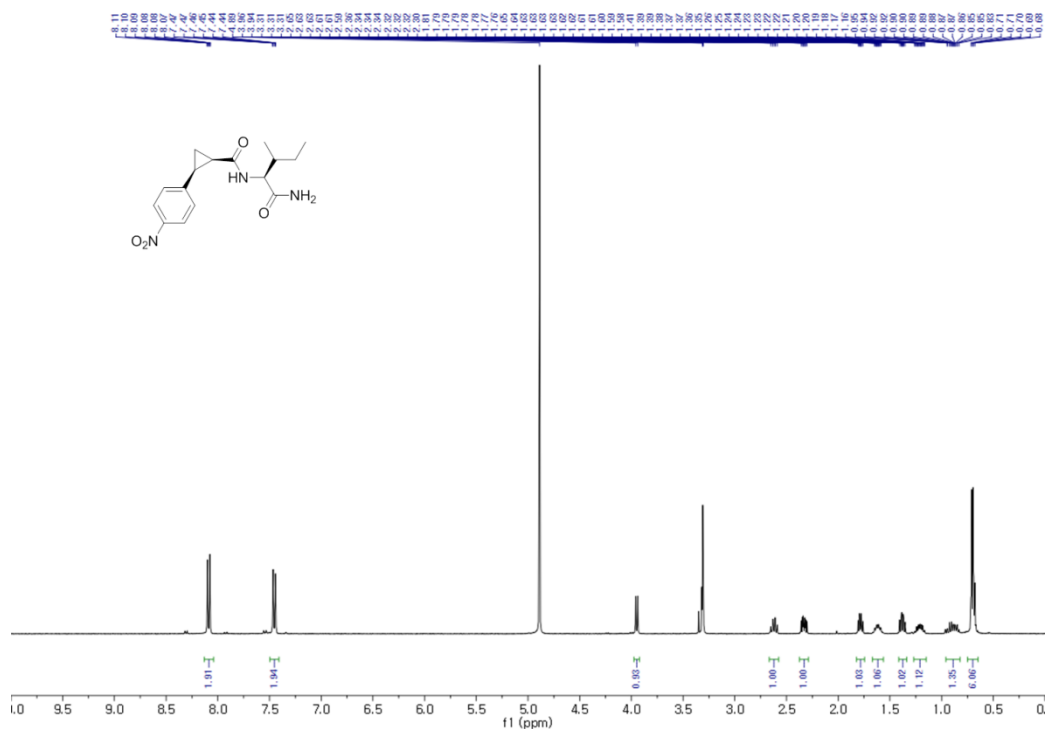

400 MHz, <sup>1</sup>H NMR in DMSO-*d*<sub>6</sub>

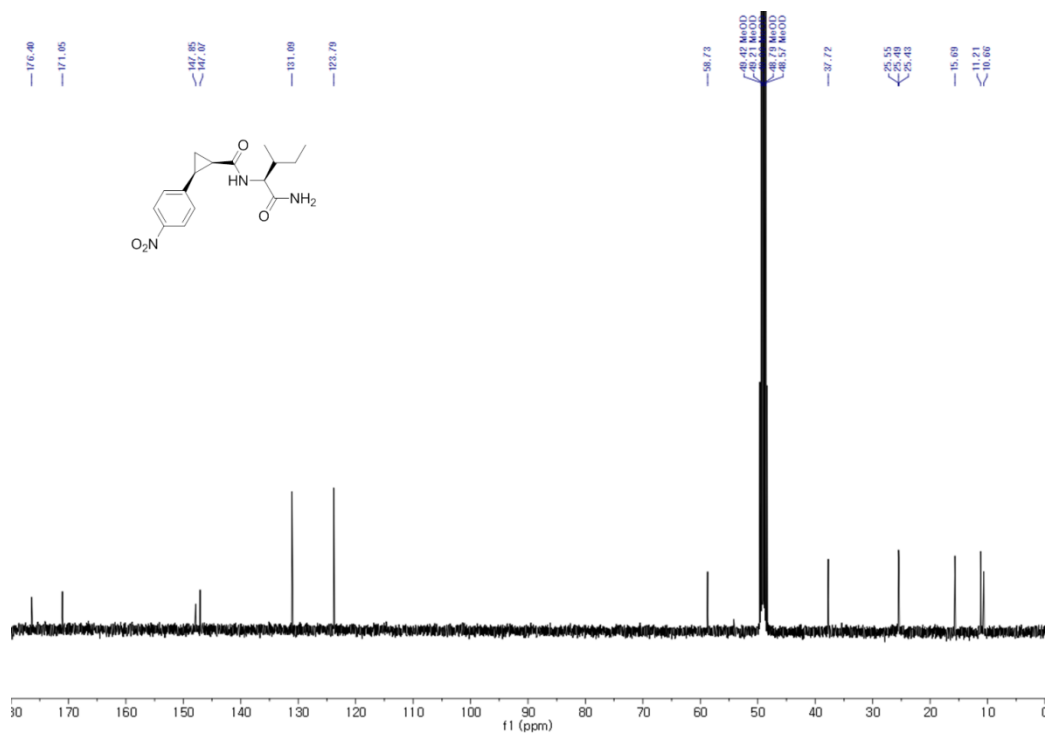

100 MHz,  $^{13}\text{C}$  NMR in  $\text{DMSO}-d_6$

(1R, 2S)-N-((2S, 3R)-1-amino-3-methyl-1-oxopentan-2-yl)-2-(2-methoxyphenyl)cyclopropanecarboxamide (3w)

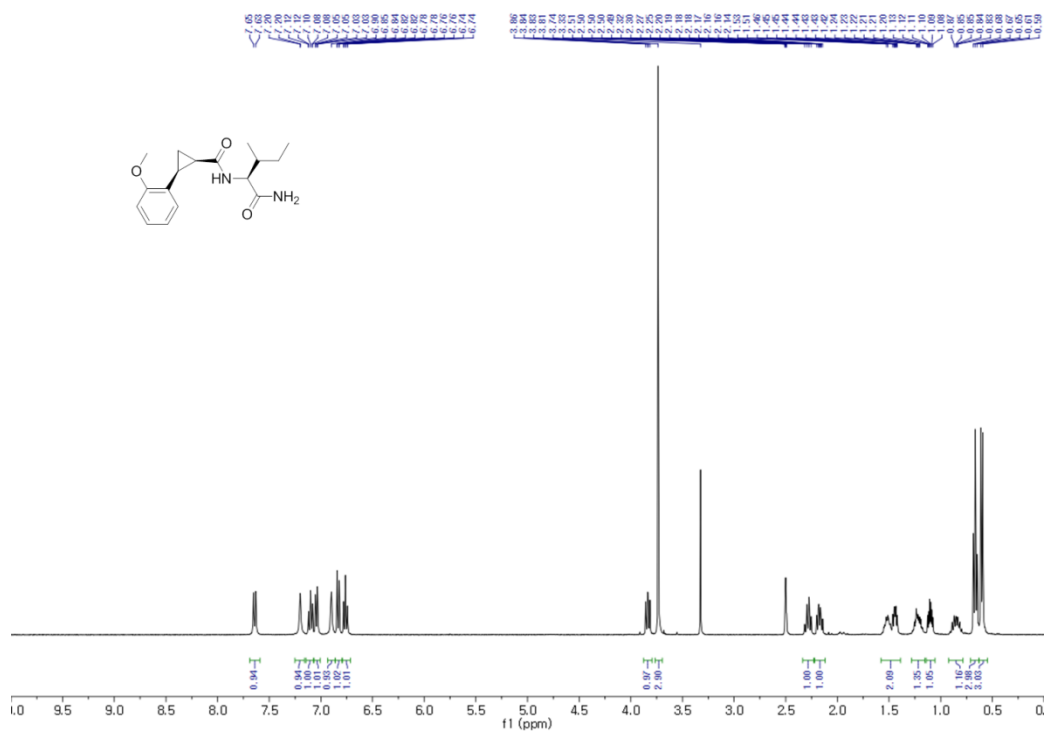

400 MHz,  $^1\text{H}$  NMR in  $\text{DMSO}-d_6$



400 MHz, <sup>1</sup>H NMR in DMSO-*d*<sub>6</sub>

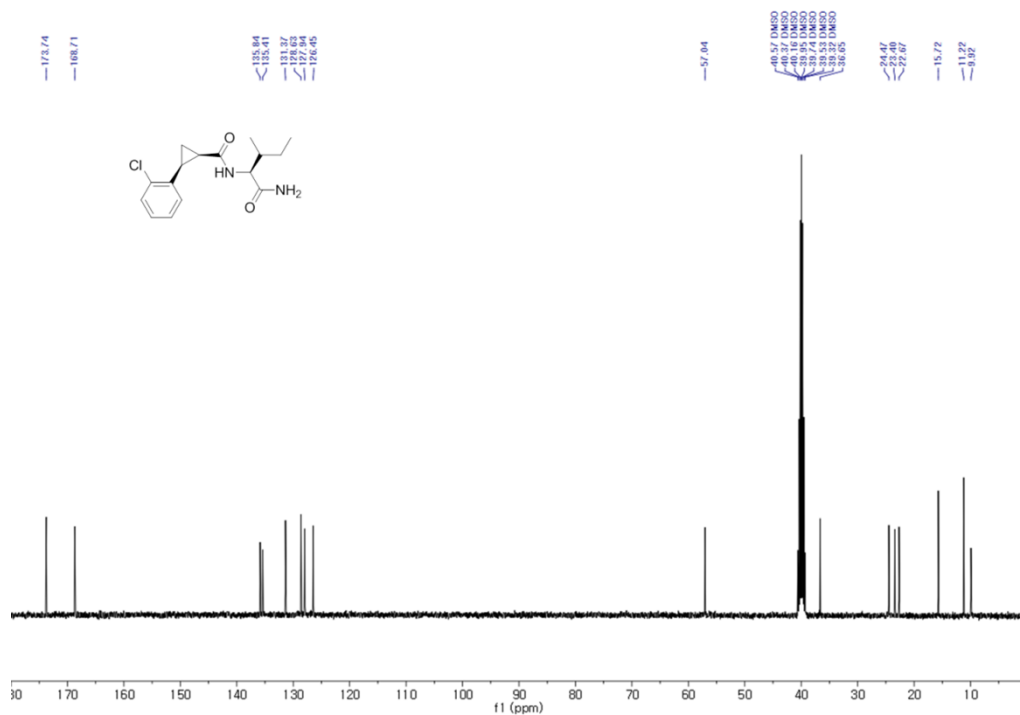

400 MHz, <sup>1</sup>H NMR in DMSO-d<sub>6</sub>

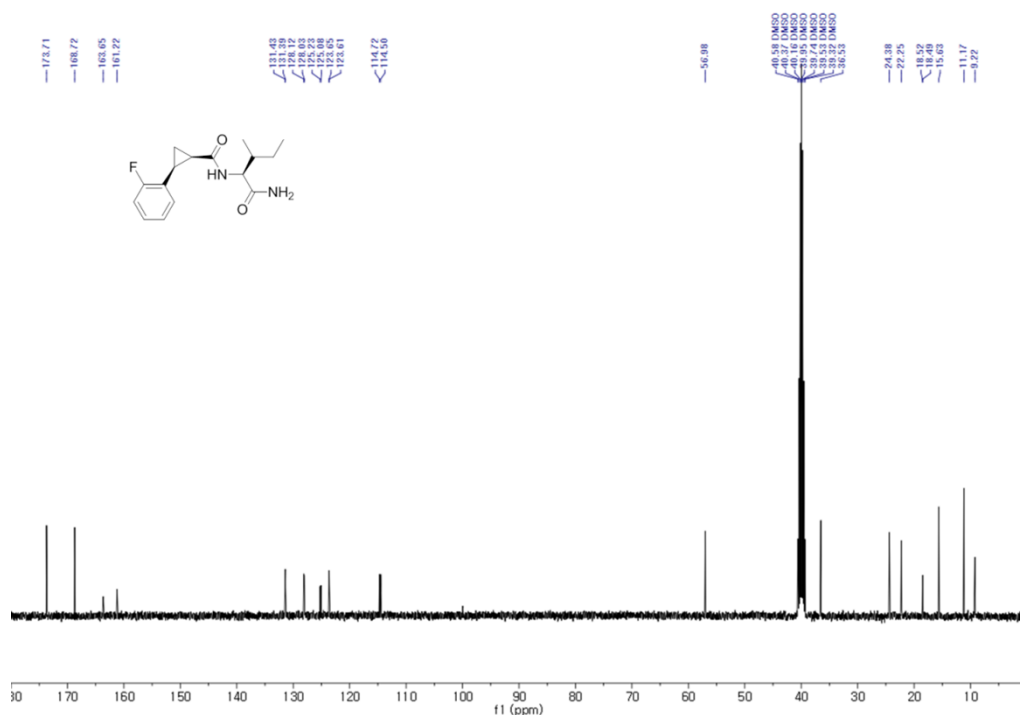

100 MHz, <sup>13</sup>C NMR in DMSO-d<sub>6</sub>

(1R, 2S)-N-((S)-1-amino-3-methyl-1-oxobutan-2-yl)-2-((*tert*-butyldimethylsilyl)ethynyl)cyclopropane-1-carboxamide (4)

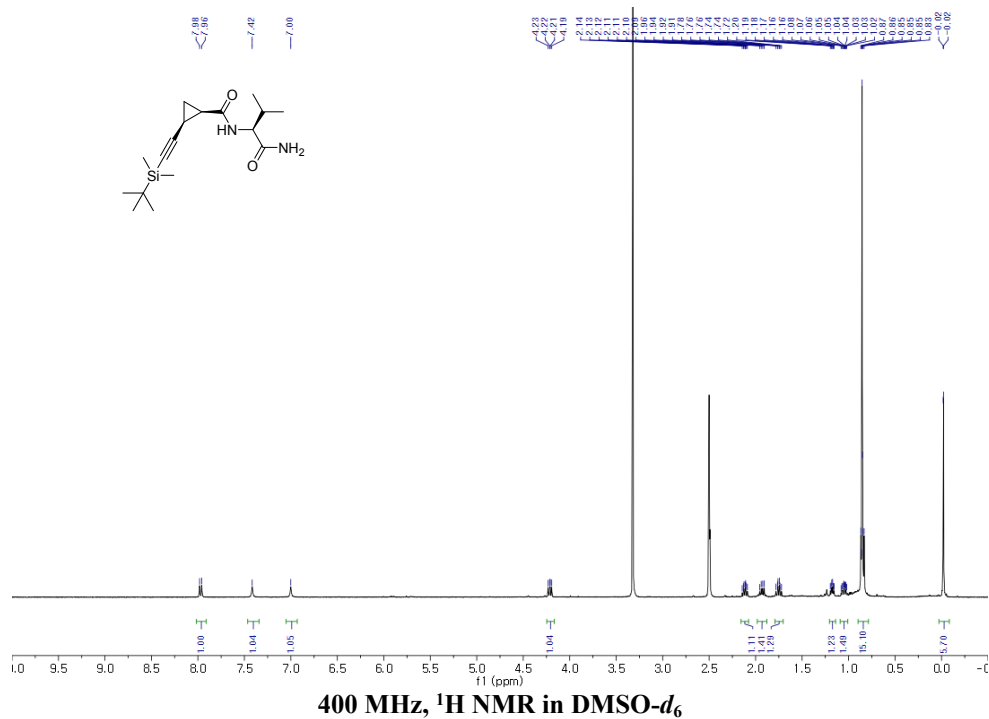

400 MHz, <sup>1</sup>H NMR in DMSO-d<sub>6</sub>



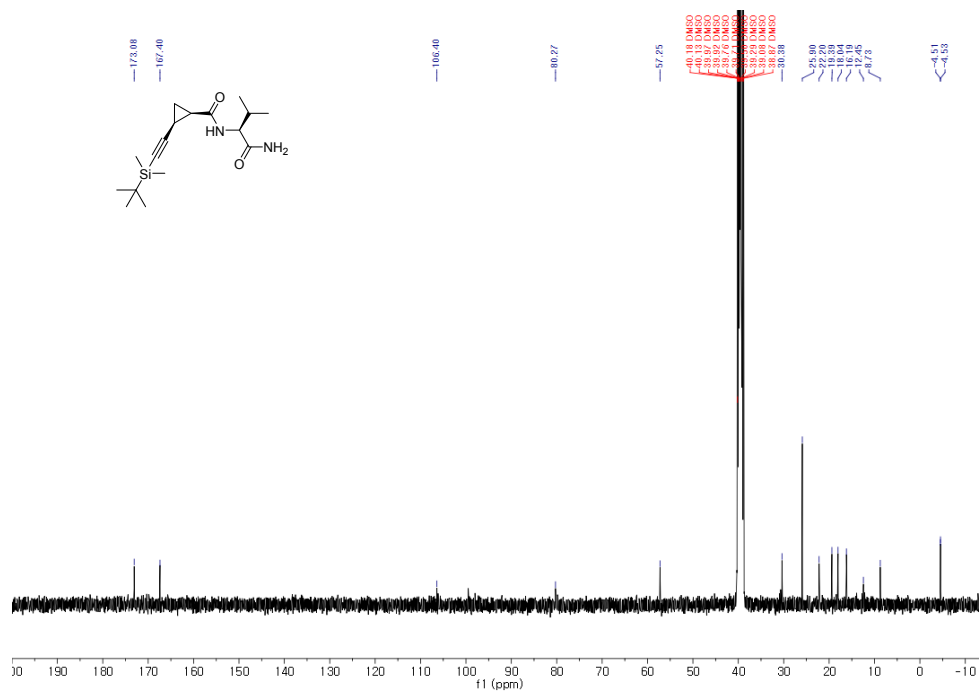

100 MHz,  $^{13}\text{C}$  NMR in  $\text{DMSO-}d_6$

Crystallographic Data for 2a

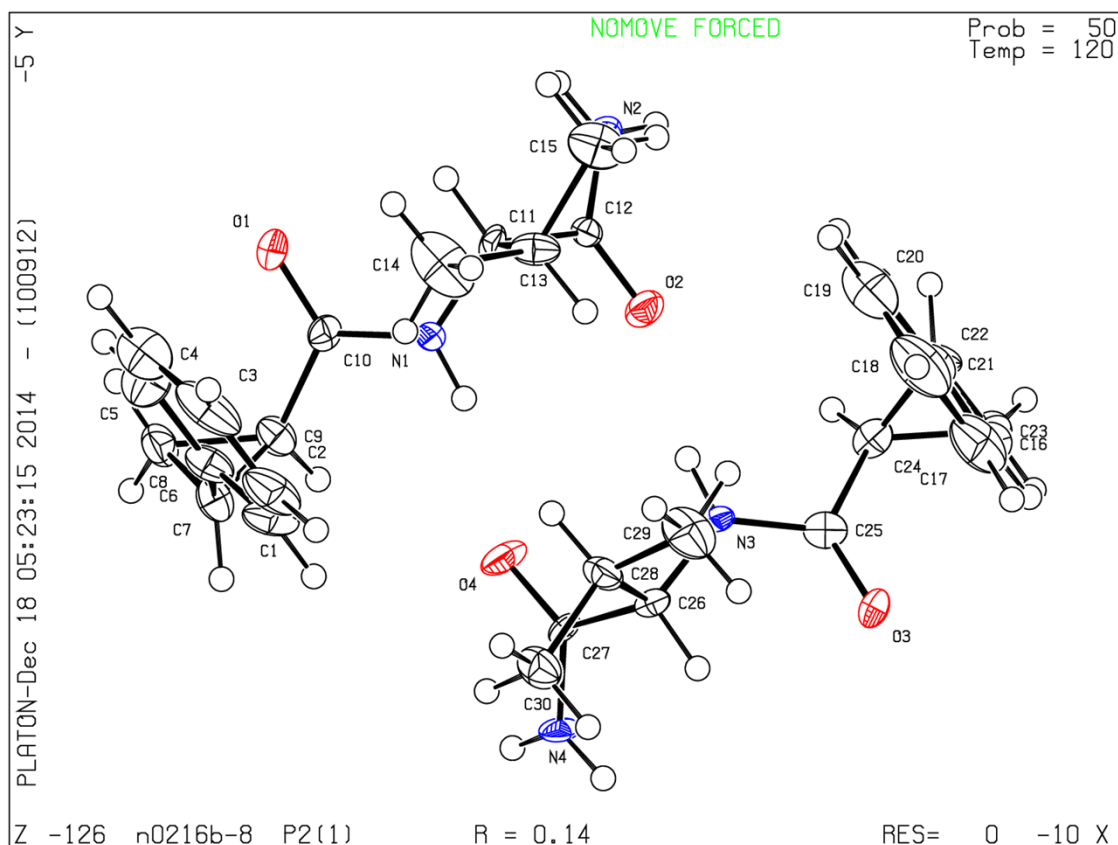

Table S1. Crystal data and structure refinement for **2a**.

|                        |                                                               |                  |
|------------------------|---------------------------------------------------------------|------------------|
| Identification code    | n0216b-8                                                      |                  |
| Empirical formula      | C <sub>15</sub> H <sub>20</sub> N <sub>2</sub> O <sub>2</sub> |                  |
| Formula weight         | 260.33                                                        |                  |
| Temperature            | 120(2) K                                                      |                  |
| Wavelength             | 0.71073 Å                                                     |                  |
| Crystal system         | Monoclinic                                                    |                  |
| Space group            | P2(1)                                                         |                  |
| Unit cell dimensions   | a = 9.4882(18) Å                                              | α = 90°.         |
|                        | b = 10.3774(19) Å                                             | β = 107.509(6)°. |
|                        | c = 15.575(3) Å                                               | γ = 90°.         |
| Volume                 | 1462.5(5) Å <sup>3</sup>                                      |                  |
| Z                      | 4                                                             |                  |
| Density (calculated)   | 1.182 Mg/m <sup>3</sup>                                       |                  |
| Absorption coefficient | 0.079 mm <sup>-1</sup>                                        |                  |

|                                   |                                             |
|-----------------------------------|---------------------------------------------|
| F(000)                            | 560                                         |
| Crystal size                      | 0.40 x 0.06 x 0.04 mm <sup>3</sup>          |
| Theta range for data collection   | 2.97 to 28.28°.                             |
| Index ranges                      | -11<=h<=12, -13<=k<=13, -20<=l<=20          |
| Reflections collected             | 15954                                       |
| Independent reflections           | 5733 [R(int) = 0.0651]                      |
| Completeness to theta = 25.00°    | 76.7 %                                      |
| Absorption correction             | Semi-empirical from equivalents             |
| Max. and min. transmission        | 0.9968 and 0.9691                           |
| Refinement method                 | Full-matrix least-squares on F <sup>2</sup> |
| Data / restraints / parameters    | 5733 / 337 / 343                            |
| Goodness-of-fit on F <sup>2</sup> | 1.148                                       |
| Final R indices [I>2sigma(I)]     | R1 = 0.1445, wR2 = 0.3846                   |
| R indices (all data)              | R1 = 0.1687, wR2 = 0.3965                   |
| Largest diff. peak and hole       | 0.491 and -0.559 e.Å <sup>-3</sup>          |

Table S2. Atomic coordinates ( $\times 10^4$ ) and equivalent isotropic displacement parameters ( $\text{\AA}^2 \times 10^3$ ) for **2a**.  $U(\text{eq})$  is defined as one third of the trace of the orthogonalized  $U^{ij}$  tensor.

|       | x         | y         | z       | U(eq) |
|-------|-----------|-----------|---------|-------|
| N(1)  | 8856(7)   | 7925(6)   | 6454(4) | 17(1) |
| N(2)  | 9637(8)   | 4727(7)   | 6147(5) | 28(2) |
| O(1)  | 10970(6)  | 8865(5)   | 6388(4) | 27(1) |
| O(2)  | 7425(6)   | 5525(6)   | 6112(4) | 26(1) |
| C(1)  | 8591(11)  | 11152(10) | 7885(6) | 36(2) |
| C(2)  | 9195(14)  | 11173(10) | 8797(7) | 43(2) |
| C(3)  | 10705(15) | 11305(10) | 9180(6) | 48(2) |
| C(4)  | 11581(13) | 11407(10) | 8606(7) | 42(2) |
| C(5)  | 10946(12) | 11357(11) | 7675(7) | 41(2) |
| C(6)  | 9442(10)  | 11236(8)  | 7318(5) | 27(2) |
| C(7)  | 8659(10)  | 11194(8)  | 6310(5) | 26(2) |
| C(8)  | 9415(10)  | 11183(8)  | 5605(6) | 29(2) |
| C(9)  | 8699(10)  | 10003(8)  | 5772(5) | 25(2) |
| C(10) | 9604(8)   | 8896(7)   | 6208(5) | 19(1) |
| C(11) | 9551(8)   | 6757(7)   | 6882(5) | 20(1) |
| C(12) | 8774(8)   | 5607(7)   | 6340(5) | 16(1) |
| C(13) | 9515(9)   | 6611(8)   | 7872(5) | 26(2) |
| C(14) | 10240(17) | 7772(11)  | 8428(7) | 54(3) |
| C(15) | 10319(12) | 5370(10)  | 8285(6) | 37(2) |
| N(3)  | 4762(7)   | 6404(6)   | 6615(4) | 19(1) |
| N(4)  | 3331(7)   | 9247(7)   | 5646(4) | 22(1) |
| O(3)  | 2655(6)   | 5516(6)   | 6712(4) | 25(1) |
| O(4)  | 5687(6)   | 8627(7)   | 5846(4) | 30(1) |
| C(16) | 4140(11)  | 3602(10)  | 8300(6) | 35(2) |
| C(17) | 4541(15)  | 3926(10)  | 9225(7) | 47(2) |
| C(18) | 6004(16)  | 4072(11)  | 9755(7) | 52(2) |
| C(19) | 7066(14)  | 3934(10)  | 9353(7) | 46(2) |
| C(20) | 6760(10)  | 3632(8)   | 8422(7) | 35(2) |
| C(21) | 5262(10)  | 3456(7)   | 7903(5) | 26(2) |
| C(22) | 4979(10)  | 3205(9)   | 6931(6) | 32(2) |

|       |          |          |         |       |
|-------|----------|----------|---------|-------|
| C(23) | 3539(9)  | 2983(8)  | 6282(6) | 28(2) |
| C(24) | 4336(9)  | 4204(8)  | 6221(5) | 23(1) |
| C(25) | 3810(9)  | 5404(8)  | 6537(5) | 22(1) |
| C(26) | 4432(8)  | 7712(7)  | 6848(5) | 18(1) |
| C(27) | 4551(7)  | 8583(7)  | 6081(4) | 15(1) |
| C(28) | 5437(9)  | 8209(7)  | 7744(5) | 23(1) |
| C(29) | 5499(13) | 7257(10) | 8504(7) | 41(2) |
| C(30) | 4960(11) | 9558(8)  | 7930(6) | 30(2) |

---

Table S3. Bond lengths [ $\text{\AA}$ ] and angles [ $^\circ$ ] for **2a**.

---

|             |           |
|-------------|-----------|
| N(1)-C(10)  | 1.353(9)  |
| N(1)-C(11)  | 1.444(9)  |
| N(2)-C(12)  | 1.320(10) |
| O(1)-C(10)  | 1.241(9)  |
| O(2)-C(12)  | 1.225(9)  |
| C(1)-C(2)   | 1.362(14) |
| C(1)-C(6)   | 1.367(13) |
| C(2)-C(3)   | 1.383(18) |
| C(3)-C(4)   | 1.396(17) |
| C(4)-C(5)   | 1.393(14) |
| C(5)-C(6)   | 1.372(14) |
| C(6)-C(7)   | 1.523(11) |
| C(7)-C(8)   | 1.482(11) |
| C(7)-C(9)   | 1.500(11) |
| C(8)-C(9)   | 1.461(11) |
| C(9)-C(10)  | 1.472(11) |
| C(11)-C(12) | 1.518(10) |
| C(11)-C(13) | 1.559(10) |
| C(13)-C(14) | 1.522(13) |
| C(13)-C(15) | 1.536(12) |
| N(3)-C(25)  | 1.357(11) |
| N(3)-C(26)  | 1.463(9)  |
| N(4)-C(27)  | 1.342(9)  |

|             |           |
|-------------|-----------|
| O(3)-C(25)  | 1.212(9)  |
| O(4)-C(27)  | 1.239(8)  |
| C(16)-C(21) | 1.392(12) |
| C(16)-C(17) | 1.415(14) |
| C(17)-C(18) | 1.394(19) |
| C(18)-C(19) | 1.345(18) |
| C(19)-C(20) | 1.426(14) |
| C(20)-C(21) | 1.419(12) |
| C(21)-C(22) | 1.478(11) |
| C(22)-C(23) | 1.453(13) |
| C(22)-C(24) | 1.505(12) |
| C(23)-C(24) | 1.494(11) |
| C(24)-C(25) | 1.479(10) |
| C(26)-C(28) | 1.523(10) |
| C(26)-C(27) | 1.529(10) |
| C(28)-C(30) | 1.526(10) |
| C(28)-C(29) | 1.530(12) |

|                  |           |
|------------------|-----------|
| C(10)-N(1)-C(11) | 123.4(6)  |
| C(2)-C(1)-C(6)   | 121.8(10) |
| C(1)-C(2)-C(3)   | 120.5(9)  |
| C(2)-C(3)-C(4)   | 118.1(9)  |
| C(5)-C(4)-C(3)   | 120.6(10) |
| C(6)-C(5)-C(4)   | 119.8(9)  |
| C(1)-C(6)-C(5)   | 119.3(8)  |
| C(1)-C(6)-C(7)   | 117.6(8)  |
| C(5)-C(6)-C(7)   | 123.1(8)  |
| C(8)-C(7)-C(9)   | 58.7(5)   |
| C(8)-C(7)-C(6)   | 124.7(8)  |
| C(9)-C(7)-C(6)   | 120.9(7)  |
| C(9)-C(8)-C(7)   | 61.3(5)   |
| C(8)-C(9)-C(10)  | 119.9(8)  |
| C(8)-C(9)-C(7)   | 60.0(5)   |
| C(10)-C(9)-C(7)  | 119.7(7)  |
| O(1)-C(10)-N(1)  | 121.2(7)  |

|                   |           |
|-------------------|-----------|
| O(1)-C(10)-C(9)   | 123.3(7)  |
| N(1)-C(10)-C(9)   | 115.4(7)  |
| N(1)-C(11)-C(12)  | 109.0(6)  |
| N(1)-C(11)-C(13)  | 113.3(6)  |
| C(12)-C(11)-C(13) | 108.8(6)  |
| O(2)-C(12)-N(2)   | 123.5(7)  |
| O(2)-C(12)-C(11)  | 120.4(6)  |
| N(2)-C(12)-C(11)  | 116.1(6)  |
| C(14)-C(13)-C(15) | 110.0(8)  |
| C(14)-C(13)-C(11) | 110.2(8)  |
| C(15)-C(13)-C(11) | 109.9(6)  |
| C(25)-N(3)-C(26)  | 123.0(6)  |
| C(21)-C(16)-C(17) | 118.1(9)  |
| C(18)-C(17)-C(16) | 122.9(10) |
| C(19)-C(18)-C(17) | 117.7(9)  |
| C(18)-C(19)-C(20) | 123.1(10) |
| C(21)-C(20)-C(19) | 118.0(10) |
| C(16)-C(21)-C(20) | 120.1(8)  |
| C(16)-C(21)-C(22) | 123.1(8)  |
| C(20)-C(21)-C(22) | 116.6(8)  |
| C(23)-C(22)-C(21) | 125.7(8)  |
| C(23)-C(22)-C(24) | 60.6(5)   |
| C(21)-C(22)-C(24) | 122.6(7)  |
| C(22)-C(23)-C(24) | 61.4(6)   |
| C(25)-C(24)-C(23) | 117.7(6)  |
| C(25)-C(24)-C(22) | 116.0(6)  |
| C(23)-C(24)-C(22) | 58.0(6)   |
| O(3)-C(25)-N(3)   | 121.9(7)  |
| O(3)-C(25)-C(24)  | 125.0(8)  |
| N(3)-C(25)-C(24)  | 113.1(6)  |
| N(3)-C(26)-C(28)  | 114.8(6)  |
| N(3)-C(26)-C(27)  | 106.4(5)  |
| C(28)-C(26)-C(27) | 110.0(6)  |
| O(4)-C(27)-N(4)   | 121.8(6)  |
| O(4)-C(27)-C(26)  | 121.9(6)  |

|                   |          |
|-------------------|----------|
| N(4)-C(27)-C(26)  | 116.3(6) |
| C(26)-C(28)-C(30) | 110.2(7) |
| C(26)-C(28)-C(29) | 111.0(7) |
| C(30)-C(28)-C(29) | 112.9(7) |

---

Symmetry transformations used to generate equivalent atoms:

Table S4. Anisotropic displacement parameters ( $\text{\AA}^2 \times 10^3$ ) for **2a**. The anisotropic displacement factor exponent takes the form:  $-2\pi^2 [ h^2 a^{*2} U^{11} + \dots + 2 h k a^* b^* U^{12} ]$

|       | U <sup>11</sup> | U <sup>22</sup> | U <sup>33</sup> | U <sup>23</sup> | U <sup>13</sup> | U <sup>12</sup> |
|-------|-----------------|-----------------|-----------------|-----------------|-----------------|-----------------|
| N(1)  | 14(3)           | 12(2)           | 26(3)           | -2(2)           | 6(2)            | 0(2)            |
| N(2)  | 18(3)           | 30(4)           | 34(4)           | -8(3)           | 7(3)            | -4(3)           |
| O(1)  | 22(3)           | 24(3)           | 37(3)           | 5(2)            | 13(2)           | -5(2)           |
| O(2)  | 19(3)           | 25(3)           | 38(3)           | -11(2)          | 13(2)           | -3(2)           |
| C(1)  | 40(4)           | 35(5)           | 37(4)           | 1(4)            | 17(4)           | 19(4)           |
| C(2)  | 70(6)           | 30(5)           | 39(4)           | 6(4)            | 32(5)           | 20(5)           |
| C(3)  | 83(6)           | 31(4)           | 21(4)           | 4(3)            | 4(4)            | 21(5)           |
| C(4)  | 48(5)           | 38(5)           | 29(4)           | -5(4)           | -3(3)           | 2(4)            |
| C(5)  | 39(4)           | 46(5)           | 35(4)           | -2(4)           | 9(4)            | -4(4)           |
| C(6)  | 35(4)           | 23(4)           | 19(3)           | 1(3)            | 1(3)            | 10(3)           |
| C(7)  | 35(4)           | 18(3)           | 25(3)           | -3(3)           | 9(3)            | -2(3)           |
| C(8)  | 36(4)           | 20(3)           | 34(4)           | 6(3)            | 16(4)           | 1(3)            |
| C(9)  | 31(4)           | 22(3)           | 20(3)           | 4(3)            | 7(3)            | 3(3)            |
| C(10) | 21(3)           | 22(3)           | 19(3)           | 0(2)            | 13(3)           | -1(3)           |
| C(11) | 13(3)           | 21(3)           | 25(3)           | -1(2)           | 3(3)            | -8(3)           |
| C(12) | 14(3)           | 13(3)           | 18(3)           | -2(2)           | 0(3)            | 0(2)            |
| C(13) | 25(4)           | 30(4)           | 21(3)           | -5(3)           | 5(3)            | 10(3)           |
| C(14) | 78(8)           | 40(5)           | 23(4)           | -6(4)           | -16(5)          | 1(5)            |
| C(15) | 45(5)           | 42(5)           | 19(3)           | 6(3)            | 4(4)            | 11(4)           |
| N(3)  | 13(3)           | 18(3)           | 28(3)           | 6(2)            | 11(2)           | 4(2)            |
| N(4)  | 14(3)           | 29(3)           | 24(3)           | 15(2)           | 7(2)            | 11(2)           |
| O(3)  | 20(3)           | 25(3)           | 35(3)           | 4(2)            | 15(2)           | -4(2)           |



|       |       |       |       |        |       |       |
|-------|-------|-------|-------|--------|-------|-------|
| O(4)  | 14(2) | 48(4) | 29(3) | 19(3)  | 10(2) | 7(2)  |
| C(16) | 34(4) | 43(5) | 32(4) | 18(4)  | 15(3) | 7(4)  |
| C(17) | 79(6) | 36(5) | 33(4) | 17(4)  | 25(4) | 12(5) |
| C(18) | 87(7) | 37(5) | 29(4) | 12(4)  | 12(4) | 11(5) |
| C(19) | 61(6) | 32(5) | 30(4) | -3(4)  | -7(4) | 2(5)  |
| C(20) | 28(4) | 22(4) | 44(4) | 1(3)   | -5(3) | -1(3) |
| C(21) | 35(4) | 16(3) | 26(3) | 0(3)   | 10(3) | 3(3)  |
| C(22) | 32(4) | 29(4) | 30(3) | -10(3) | 4(3)  | 14(3) |
| C(23) | 29(4) | 26(3) | 32(4) | 0(3)   | 16(3) | 1(3)  |
| C(24) | 21(3) | 28(3) | 20(3) | -8(3)  | 7(3)  | -3(3) |
| C(25) | 24(4) | 28(3) | 13(3) | -2(3)  | 4(3)  | 4(3)  |
| C(26) | 12(3) | 22(3) | 21(3) | -1(2)  | 5(2)  | 2(2)  |
| C(27) | 11(3) | 22(3) | 16(3) | -1(2)  | 9(2)  | -1(2) |
| C(28) | 24(4) | 16(3) | 27(3) | -3(3)  | 2(3)  | 4(3)  |
| C(29) | 50(6) | 38(5) | 27(4) | 11(4)  | -1(4) | 6(4)  |
| C(30) | 36(5) | 22(3) | 33(4) | -5(3)  | 9(4)  | 2(3)  |

Table S5. Hydrogen coordinates ( $\times 10^4$ ) and isotropic displacement parameters ( $\text{\AA}^2 \times 10^{-3}$ ) for **2a**.

|       | x     | y     | z    | U(eq) |
|-------|-------|-------|------|-------|
| H(1B) | 7895  | 8009  | 6347 | 21    |
| H(2B) | 9247  | 4036  | 5839 | 33    |
| H(2C) | 10602 | 4831  | 6327 | 33    |
| H(1A) | 7549  | 11077 | 7636 | 43    |
| H(2A) | 8575  | 11096 | 9172 | 52    |
| H(3A) | 11133 | 11326 | 9815 | 57    |
| H(4A) | 12620 | 11511 | 8852 | 50    |
| H(5A) | 11552 | 11407 | 7289 | 49    |
| H(7A) | 7683  | 11647 | 6126 | 31    |
| H(8A) | 8941  | 11656 | 5039 | 34    |
| H(8B) | 10508 | 11205 | 5803 | 34    |

|        |       |       |       |    |
|--------|-------|-------|-------|----|
| H(9A)  | 7750  | 9781  | 5305  | 30 |
| H(11A) | 10605 | 6756  | 6883  | 24 |
| H(13A) | 8462  | 6558  | 7871  | 31 |
| H(14A) | 10209 | 7670  | 9048  | 81 |
| H(14B) | 9707  | 8557  | 8168  | 81 |
| H(14C) | 11270 | 7836  | 8428  | 81 |
| H(15A) | 10282 | 5279  | 8905  | 55 |
| H(15B) | 11351 | 5412  | 8287  | 55 |
| H(15C) | 9836  | 4627  | 7929  | 55 |
| H(3B)  | 5617  | 6259  | 6521  | 22 |
| H(4B)  | 3324  | 9730  | 5180  | 27 |
| H(4C)  | 2538  | 9199  | 5826  | 27 |
| H(16A) | 3133  | 3487  | 7960  | 42 |
| H(17A) | 3778  | 4048  | 9496  | 57 |
| H(18A) | 6243  | 4263  | 10379 | 63 |
| H(19A) | 8067  | 4042  | 9706  | 55 |
| H(20A) | 7536  | 3550  | 8156  | 42 |
| H(22A) | 5780  | 2687  | 6801  | 38 |
| H(23A) | 2662  | 3041  | 6500  | 33 |
| H(23B) | 3469  | 2322  | 5813  | 33 |
| H(24A) | 4779  | 4281  | 5717  | 27 |
| H(26A) | 3388  | 7734  | 6868  | 22 |
| H(28A) | 6457  | 8278  | 7688  | 28 |
| H(29A) | 5798  | 6407  | 8347  | 62 |
| H(29B) | 4521  | 7194  | 8592  | 62 |
| H(29C) | 6217  | 7559  | 9062  | 62 |
| H(30A) | 4922  | 10122 | 7419  | 46 |
| H(30B) | 5672  | 9903  | 8475  | 46 |
| H(30C) | 3979  | 9516  | 8016  | 46 |

Table S6. Hydrogen bonds for N0216B-8 [ $\text{\AA}$  and  $^\circ$ ].

| D-H...A | d(D-H) | d(H...A) | d(D...A) | $\angle$ (DHA) |
|---------|--------|----------|----------|----------------|
|---------|--------|----------|----------|----------------|

---

|                     |      |      |          |       |
|---------------------|------|------|----------|-------|
| N(1)-H(1B)...O(4)   | 0.88 | 2.10 | 2.959(8) | 163.6 |
| N(3)-H(3B)...O(2)   | 0.88 | 2.14 | 3.003(8) | 166.3 |
| N(2)-H(2C)...O(3)#1 | 0.88 | 1.99 | 2.851(9) | 166.1 |
| N(4)-H(4B)...O(2)#2 | 0.88 | 2.09 | 2.931(8) | 159.0 |

---

Symmetry transformations used to generate equivalent atoms:

#1  $x+1,y,z$     #2  $-x+1,y+1/2,-z+1$
